1 **Title**

2  
3 Locally confined IFN $\gamma$  production by CD4<sup>+</sup> T cells provides niches for murine cytomegalovirus  
4 replication in the salivary gland  
5  
6

7 **Authors**

8  
9 Josua Oderbolz<sup>1</sup>, Nathan Zangger<sup>1\*</sup>, Lea Zimmermann<sup>2\*</sup>, Ioana Sandu<sup>1,3</sup>, Jörn Starruß<sup>4</sup>, Frederik  
10 Graw<sup>2</sup> & Annette Oxenius<sup>1</sup>  
11

12 <sup>1</sup>Institute of Microbiology, ETH Zurich, 8093 Zurich, Switzerland

13 <sup>2</sup>BioQuant - Center for Quantitative Biology, Heidelberg University, 69120 Heidelberg, Germany

14 <sup>3</sup>Institute of Molecular Systems Biology, ETH Zurich, 8093 Zurich, Switzerland

15 <sup>4</sup>Center for Information Services and High Performance Computing, TU Dresden, 01062 Dresden,  
16 Germany  
17

18  
19 J.O. and A.O. designed the experiments. J.O., N.Z. and L.Z. performed the experiments. J.O., N.Z.  
20 and L.Z. analyzed the data. L.Z. and F.G. developed and analyzed the mathematical model, J.S.  
21 implemented additional model elements and provided modeling expertise, I.S. provided essential  
22 tools. J.O., F.G. and A.O. wrote the manuscript.  
23

24 \* contributed equally to this work  
25

26 All the authors declare no competing interests.  
27

28 Correspondence and requests for materials should be addressed to A. O. Institute of Microbiology,  
29 ETH Zürich, Vladimir-Prelog-Weg 4, 8093 Zürich, Switzerland. Phone number: +41 44 632 33 17.

30 Email: [aoxenius@micro.biol.ethz.ch](mailto:aoxenius@micro.biol.ethz.ch)  
31  
32  
33  
34

## 35 **Abstract**

36  
37 Cytomegalovirus (CMV) has evolved a unique virus-host relationship in the salivary glands (SGs)  
38 to sustain prolonged viral replication and hence chances for horizontal transmission. Previous  
39 reports have established a decisive role for IFN $\gamma$  producing CD4 $^+$  T cells to control murine CMV  
40 (MCMV) infection in the SGs; however, micro-anatomical information regarding their mode of  
41 action is largely missing. Here, we provide a spatiotemporal analysis of defined antiviral immune  
42 actions that eventually culminate in control of lytic MCMV replication in this preferred mucosal  
43 niche. CXCR3-mediated guidance of CD4 $^+$  T cells towards CXCL9 and CXCL10 expressing cells  
44 resulted in discrete clusters close to infection foci where they reported TCR engagement and  
45 produced IFN $\gamma$ . Of note, these clusters occasionally contained CD11c $^+$  antigen-presenting cells  
46 with engulfed virus-associated remnants, most likely apoptotic bodies derived from previously  
47 infected cells, enabling antigen presentation to CD4 $^+$  T cells. The induced IFN $\gamma$  production within  
48 these CD4 $^+$  T cell accumulations triggered IFN $\gamma$ R signaling in a confined perimeter, thereby  
49 inducing local, but not organ-wide protection, and allowing MCMV replication to continue at not  
50 yet protected sites. Combining experimental data with a mathematical model of the spatiotemporal  
51 dynamics of infection and CD4 $^+$  T cell dynamics revealed a scenario, in which ultimate MCMV  
52 control is achieved through accumulating sites of regionally-confined tissue protection.

53  
54 Key words: MCMV, salivary glands, CD4 $^+$  T cells, IFN $\gamma$

## 56 **Introduction**

57  
58 Cytomegalovirus (CMV), a member of the herpesvirus family, is an opportunistic pathogen causing  
59 severe clinical outcomes in immunocompromised individuals<sup>1,2</sup>. Owing to many shared similarities  
60 with human CMV (HCMV), including the genetic make-up, the high degree of species specificity  
61 and the biological characteristics in their natural habitat such as the huge repertoire of immune  
62 evasion mechanisms, infection of mice with murine CMV (MCMV) is a robust infection model to  
63 study CMV pathogenesis in an animal setting<sup>3,4</sup>. Although primary MCMV infection is controlled in  
64 most visceral organs within a few days, the salivary glands (SGs) are a peripheral glandular tissue  
65 where lytic viral replication is continuing for several weeks<sup>5</sup>. The sustained high viral loads in the  
66 SGs facilitate horizontal transmission via saliva. While control of lytic MCMV replication in most  
67 tissues is mediated by MCMV-specific CD8 $^+$  T cells, this is not the case for the SGs<sup>6-8</sup>. MCMV-  
68 encoded MHC class I immune evasion genes (i.e. *m04*, *m06* and *m152*) are particularly potent in

69 avoiding recognition of infected cells by cytotoxic CD8<sup>+</sup> T cells<sup>9,10</sup>, as deletion of these immune  
70 evasion genes restores CD8<sup>+</sup> T cell recognition of MCMV harboring cells, consequently leading to  
71 CD8<sup>+</sup> T cell-mediated immune control of MCMV infection in the SGs<sup>11</sup>. Therefore, under normal  
72 circumstances, control of MCMV infection in the SGs completely relies on CD4<sup>+</sup> T cells that exert  
73 their protective effector functions primarily through the secretion of the pro-inflammatory cytokines  
74 interferon gamma (IFN $\gamma$ ) and tumor necrosis factor alpha (TNF $\alpha$ )<sup>12,13</sup>. In this regard, we have  
75 previously shown that sensing of CD4<sup>+</sup> T cell-produced IFN $\gamma$  by non-hematopoietic cells in the  
76 SGs is required for eventual control of lytic viral replication<sup>11</sup>. However, it remains unclear how  
77 long-lasting productive virus infection is maintained in this peripheral organ in face of marked  
78 infiltration of functional MCMV-specific CD4<sup>+</sup> T cells early upon infection and the prompt  
79 generation of tissue-resident memory T cells<sup>14,15</sup>. One important aspect that has so far not received  
80 much attention is information about micro-anatomical conditions and constraints in the SGs during  
81 MCMV infection. This includes spatial information about infection foci, distribution of infiltrating  
82 virus-specific CD4<sup>+</sup> T cells, sites of antigen recognition and IFN $\gamma$  production, and the range of IFN $\gamma$   
83 sensing. In the current study, we used advanced microscopy methods to visualize key  
84 components of the antiviral immune response with high spatiotemporal resolution. By combining  
85 previous knowledge with our experimental data, we further generated a mathematical model that  
86 simulates the CD4<sup>+</sup> T cell-mediated immune control of MCMV infected SGs. We propose a  
87 scenario in which MCMV antigens in the SGs are sensed by virus-specific CD4<sup>+</sup> T cells only in a  
88 delayed and indirect manner, after remnants of previously infected cells had been engulfed by  
89 local antigen-presenting cells (APCs). This leads to a locally confined IFN $\gamma$  secretion, affording  
90 protection only in this restricted area. However, non-protected areas of the SGs continue to be  
91 permissive for infection and replication, evidenced by long-term maintenance of high viral loads in  
92 the SGs. Eventual control occurs if local IFN $\gamma$ -concentrations are sufficiently effective to allow  
93 agglomeration of protected sites, and thus restriction of viral spread. Thereby, accumulation of  
94 virus-specific CD4<sup>+</sup> T cells by APCs potentiates IFN $\gamma$  concentrations of otherwise limited IFN $\gamma$ -  
95 release by individual CD4<sup>+</sup> T cells, which enables prolonged protection of local areas and  
96 eventually leading to viral control within the tissue.

97

98

99

100

101

102

## 103 Results

### 104 105 Virus-specific CD4<sup>+</sup> T cells infiltrate MCMV-infected SGs and show an activated phenotype

106  
107 In a first set of experiments, we set out to longitudinally analyze the abundance and phenotype of  
108 MCMV-specific CD4<sup>+</sup> T cells in the SGs upon MCMV infection. As opposed to SGs of naïve mice,  
109 which hardly contain any T cells, MCMV infection leads to a substantial infiltration of CD4<sup>+</sup> and  
110 CD8<sup>+</sup> T cells (**Suppl. Fig. 1a**). To specifically focus on antigen-specific CD4<sup>+</sup> T cells, we employed  
111 T cell receptor (TCR) transgenic (tg) CD4<sup>+</sup> T cells that specifically recognize the immunodominant  
112 MCMV-epitope M25<sub>411-425</sub> in the context of MHC class II (referred to as M25 CD4<sup>+</sup> T cells) in  
113 adoptive transfer experiments<sup>16-18</sup>. M25 CD4<sup>+</sup> T cells were on a CD45.1 background, allowing the  
114 distinction from endogenous CD45.2<sup>+</sup> CD4<sup>+</sup> T cells (**Suppl. Fig. 1b**). M25 CD4<sup>+</sup> T cells were  
115 adoptively transferred one day prior to infection with recombinant green fluorescent protein (GFP)-  
116 expressing MCMV (MCMV-GFP), quantified and phenotypically characterized 8, 14 and 30 days  
117 post infection (dpi) in the SGs, spleen and lung (**Fig. 1a**). M25 CD4<sup>+</sup> T cells expanded and were  
118 present in all organs of infected mice, whereas adoptive transfer (AT) of M25 CD4<sup>+</sup> T cells into  
119 naïve or latently MCMV infected mice resulted in low M25 CD4<sup>+</sup> T cell counts in the SGs (**Suppl.**  
120 **Fig. 1c**). As expected, systemic infection with MCMV-GFP resulted in increasing viral loads in the  
121 SGs over time, but not in the spleen and lung where control happened in the first week (**Suppl.**  
122 **Fig. 1d**). We detected the highest percentages and total numbers of M25 CD4<sup>+</sup> T cells at 8 dpi,  
123 followed by a successive reduction over time (**Fig. 1b**). The continuous reduction of SG-resident  
124 M25 CD4<sup>+</sup> T cells from day 8 onwards was accompanied by increasing viral titers and stable  
125 numbers of endogenous CD4<sup>+</sup> T cells (**Suppl. Fig. 1e**). SG-infiltrating M25 CD4<sup>+</sup> T cells displayed  
126 an antigen-experienced CD44<sup>high</sup>CD62L<sup>low</sup> phenotype and expressed the surface markers LFA-1  
127 (heterodimeric integrin composed of CD11a and CD18) and CD49d, typical features that had been  
128 reported previously for MCMV-specific CD4<sup>+</sup> T cells (**Fig. 1c**)<sup>19-21</sup>. Most of the endogenous CD4<sup>+</sup>  
129 T cells were also CD44<sup>high</sup>LFA-1<sup>+</sup>CD49d<sup>+</sup>, suggesting that the majority of them were also MCMV-  
130 specific. Moreover, a considerable fraction of SG-located M25 CD4<sup>+</sup> T cells expressed the surface  
131 markers CD69 and PD-1 8 dpi, associated with an activated status (**Suppl. Fig. 1f**). Interestingly,  
132 CXCR3 (being associated with a Th1 phenotype) was almost completely absent in SG- and lung-  
133 residing CD4<sup>+</sup> T cells compared to those in spleen, submandibular lymph node and blood (**Fig.**  
134 **1d, suppl. Fig. 1g**)<sup>22,23</sup>.

135 Next, we asked the question whether M25 CD4<sup>+</sup> T cells sense their cognate antigen in the SGs.  
136 To this end, M25 CD4<sup>+</sup> T cells harboring a Nur77GFP reporter gene were used (referred to as  
137 M25xNur77GFP CD4<sup>+</sup> T cells) in which TCR engagement via cognate antigen results in GFP

138 expression<sup>24,25</sup>. M25xNur77GFP CD4<sup>+</sup> T cells were adoptively transferred one day prior to MCMV-  
139 GFP infection and GFP expression in the transferred cells was analyzed 8 and 14 dpi in SGs,  
140 spleen and lung. Despite huge differences in viral loads between SGs, spleen and lung, we  
141 observed large frequencies of Nur77GFP positive M25 CD4<sup>+</sup> T cells at 8 dpi with a subsequent  
142 decrease at 14 dpi in all organs (**Fig. 1e, suppl. Fig. 1d**). These data suggest that viral loads are  
143 not a good proxy for the amount of antigen sensed by M25-specific CD4<sup>+</sup> T cells. Similar results  
144 were obtained when a recombinant mcherry-expressing MCMV strain (MCMV-3DR) was used for  
145 the infection, which caused higher viral loads in the SGs within the first two weeks after infection  
146 compared to the MCMV-GFP mutant (**Suppl. Fig. 1h and i**). Taken together, these results indicate  
147 that SG-infiltrating M25 CD4<sup>+</sup> T cells have an activated, antigen-experienced phenotype with  
148 substantial exposure to cognate antigen during early stage of MCMV infection in the SGs.

149  
150  
151  
152  
153  
154  
155  
156  
157  
158  
159  
160  
161  
162  
163  
164  
165  
166  
167  
168  
169  
170  
171

## Figure 1

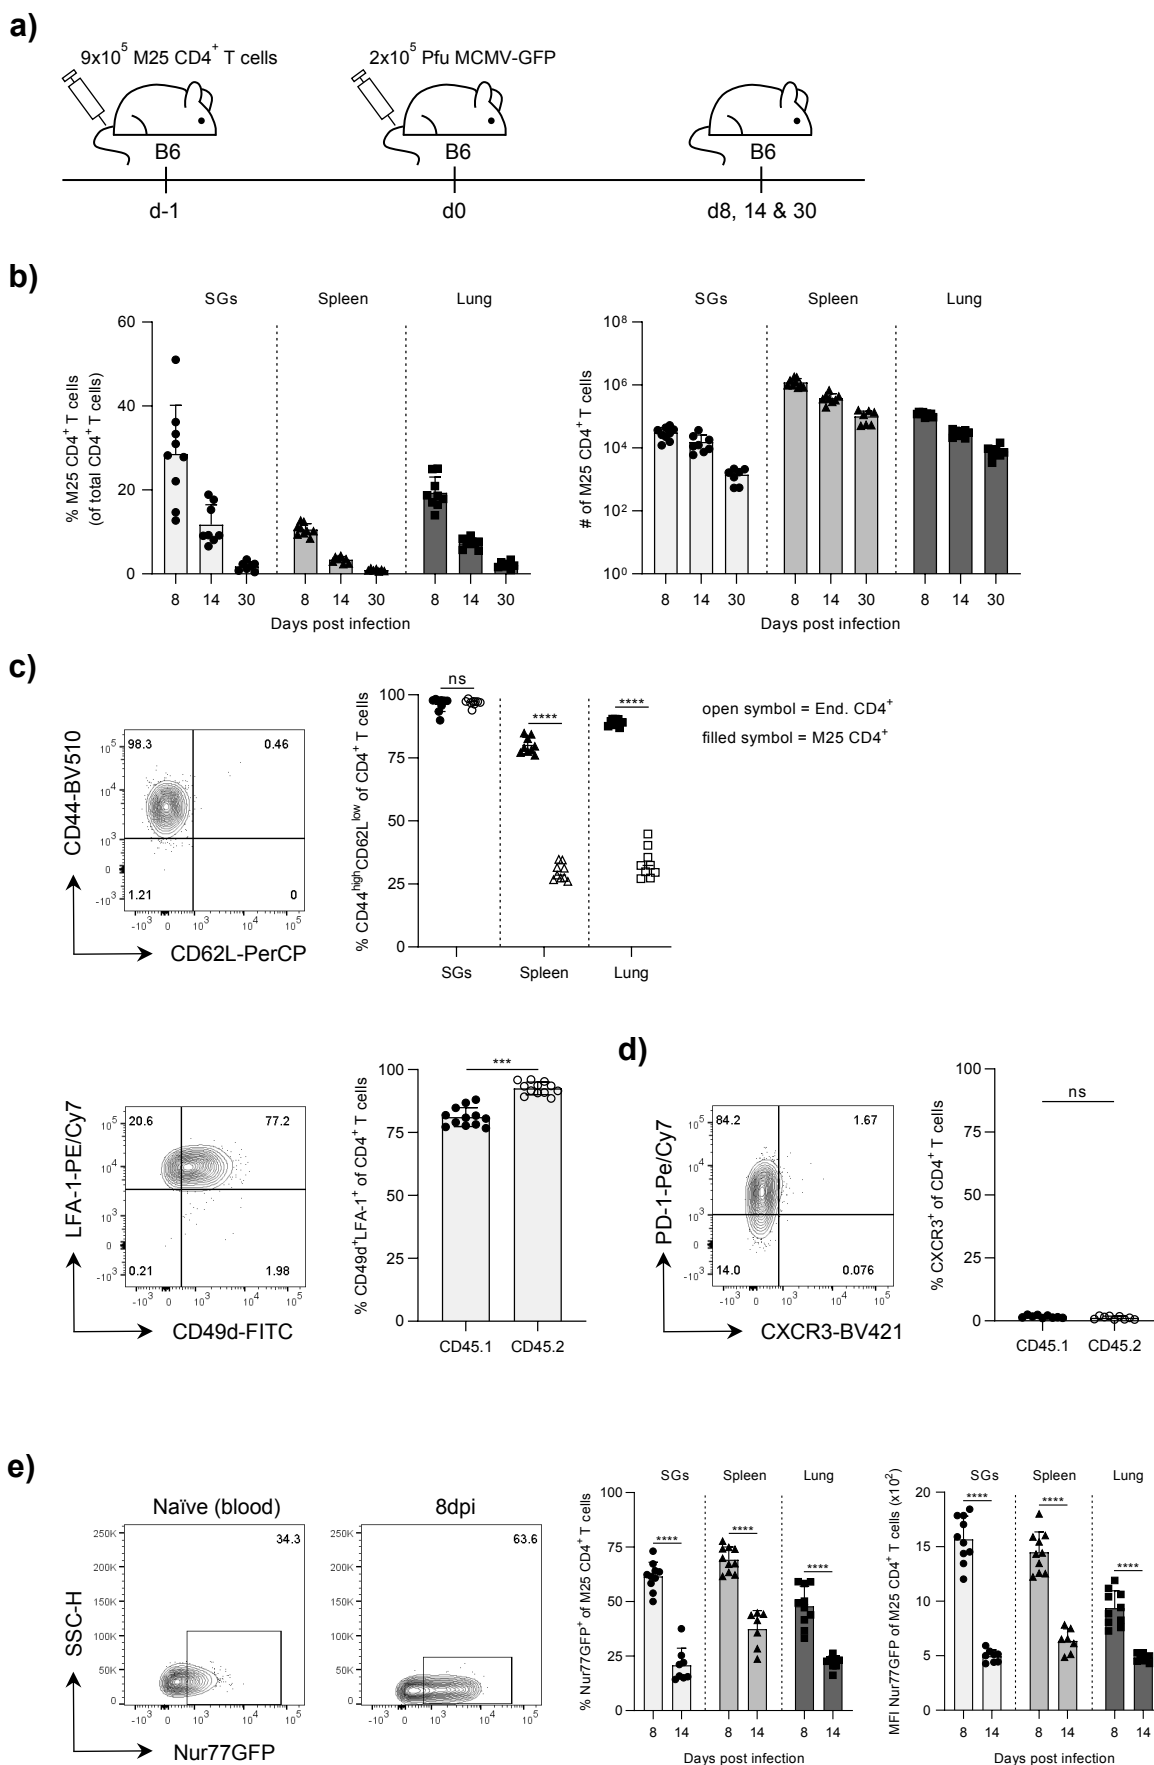

173 **Figure 1: Kinetics and phenotypic characterization of M25 CD4<sup>+</sup> T cells.** **a)** Experimental  
174 approach.  $9 \times 10^5$  MACS purified M25 CD4<sup>+</sup> T cells were adoptively transferred into naïve WT B6  
175 mice one day prior MCMV-GFP infection and analyzed in various organs at indicated time points.  
176 **b)** Percentage and total number of M25 CD4<sup>+</sup> T cells in the SGs, spleens & lungs at indicated time  
177 points. **c)** Upper row: Representative flow cytometry contour plot of CD44<sup>high</sup>CD62L<sup>low</sup> M25 CD4<sup>+</sup>  
178 T cells in the SGs (left) and percentage of CD44<sup>high</sup>CD62L<sup>low</sup> CD4<sup>+</sup> T cells in the SGs, spleens and  
179 lungs (right). Lower row: Representative flow cytometry contour plot of CD49d<sup>+</sup>LFA-1<sup>+</sup> M25 CD4<sup>+</sup>  
180 T cells (left) and percentage of CD49d<sup>+</sup>LFA-1<sup>+</sup> CD4<sup>+</sup> T cells in the SGs (right). **d)** Representative  
181 flow cytometry contour plot of CXCR3<sup>+</sup> M25 CD4<sup>+</sup> T cells in the SGs (left) and percentage of  
182 CXCR3<sup>+</sup> CD4<sup>+</sup> T cells in the SGs (right). **e)** Representative flow cytometry contour plot of  
183 Nur77GFP<sup>+</sup> M25 CD4<sup>+</sup> T cells in the blood of naïve M25xNur77GFP mice and in MCMV-GFP  
184 infected SGs (left). Percentage of Nur77GFP<sup>+</sup> M25 CD4<sup>+</sup> T cells and MFI of Nur77GFP on M25  
185 CD4<sup>+</sup> T cells in the SGs, spleens and lungs (right). **c and d)** Representative flow cytometry contour  
186 plots and analyses from 8 dpi. Filled symbol = CD45.1<sup>+</sup> M25 CD4<sup>+</sup> T cells, open symbol = CD45.2<sup>+</sup>  
187 endogenous CD4<sup>+</sup> T cells. Data in **b – e** are shown as mean + SD of n = 7 – 12 mice pooled from  
188 two independent experiments. Each symbol represents an individual mouse. Statistical  
189 significance was determined using single (**c: lower row and d**) or multiple (**c: upper row and e**)  
190 unpaired two-tailed t test. \*P<0.05, \*\*\*P<0.001, \*\*\*\*P<0.0001, ns = not significant.

191  
192  
193  
194  
195  
196  
197  
198  
199  
200  
201  
202  
203  
204  
205  
206  
207

208 ***In vivo* M25 peptide challenge leads to pronounced IFN $\gamma$  production by SG-localized M25**  
209 **CD4 $^+$  T cells in a TCR-dependent manner**

210  
211 Previous studies investigated the pro-inflammatory cytokine secretion profile of MCMV-specific  
212 CD4 $^+$  T cells upon *ex vivo* exposure to a defined pool of peptides or lysate of MCMV-infected  
213 cells<sup>16,18,19</sup>. To evaluate the potential of SG-residing M25 CD4 $^+$  T cells to produce the pro-  
214 inflammatory cytokines IFN $\gamma$  and TNF $\alpha$ , we systemically challenged mice that had received M25  
215 CD4 $^+$  T cells with the cognate M25 peptide at day 8 or 21 post MCMV infection and harvested the  
216 SGs and spleen three hours later (**Fig. 2a**)<sup>20</sup>. The majority of M25 CD4 $^+$  T cells in both organs  
217 upregulated the early T cell activation marker CD69 upon *in vivo* M25 peptide administration  
218 compared to the DMSO control injection (**Fig. 2b**). Moreover, a considerable proportion of M25  
219 CD4 $^+$  T cell expressed IFN $\gamma$  and a surprisingly low percentage co-expressed IFN $\gamma$  and TNF $\alpha$  in  
220 the SGs (**Fig. 2c**). Notably, comparable frequencies of M25 CD4 $^+$  T cells upregulated CD69 and  
221 produced IFN $\gamma$  upon *in vivo* M25 peptide challenge at 8 and 21 dpi (**Fig. 2d**). Next, we validated  
222 that IFN $\gamma$  production was due to TCR engagement. We used M25xNur77GFP CD4 $^+$  T cells for the  
223 AT, followed by MCMV infection and M25 peptide challenge at 8 dpi. Over 90% of M25 CD4 $^+$  T  
224 cells in the SGs and spleen turned Nur77GFP positive upon M25 peptide administration (**Fig. 2e**).  
225 Furthermore, IFN $\gamma^+$  cells were all Nur77GFP $^+$ , revealing that indeed the IFN $\gamma$  production is the  
226 result of TCR-based antigen recognition and downstream signaling (**Fig. 2f**). Of note, the reduced  
227 percentage of Nur77GFP $^+$  M25 CD4 $^+$  T cells at day 8 post MCMV infection in the SGs and spleen  
228 compared to results shown in Figure 1 (**Fig. 1e and suppl. Fig. 1i**) is due to the paraformaldehyde  
229 (PFA)-based fixation procedure. These data show that M25 CD4 $^+$  T cells can be locally triggered  
230 in the SGs after systemic administration of the cognate peptide, and that 10 - 40% of M25 CD4 $^+$   
231 T cells produce IFN $\gamma$  in a TCR-dependent manner.

232

233

234

235

236

237

238

239

240

241



## Figure 2

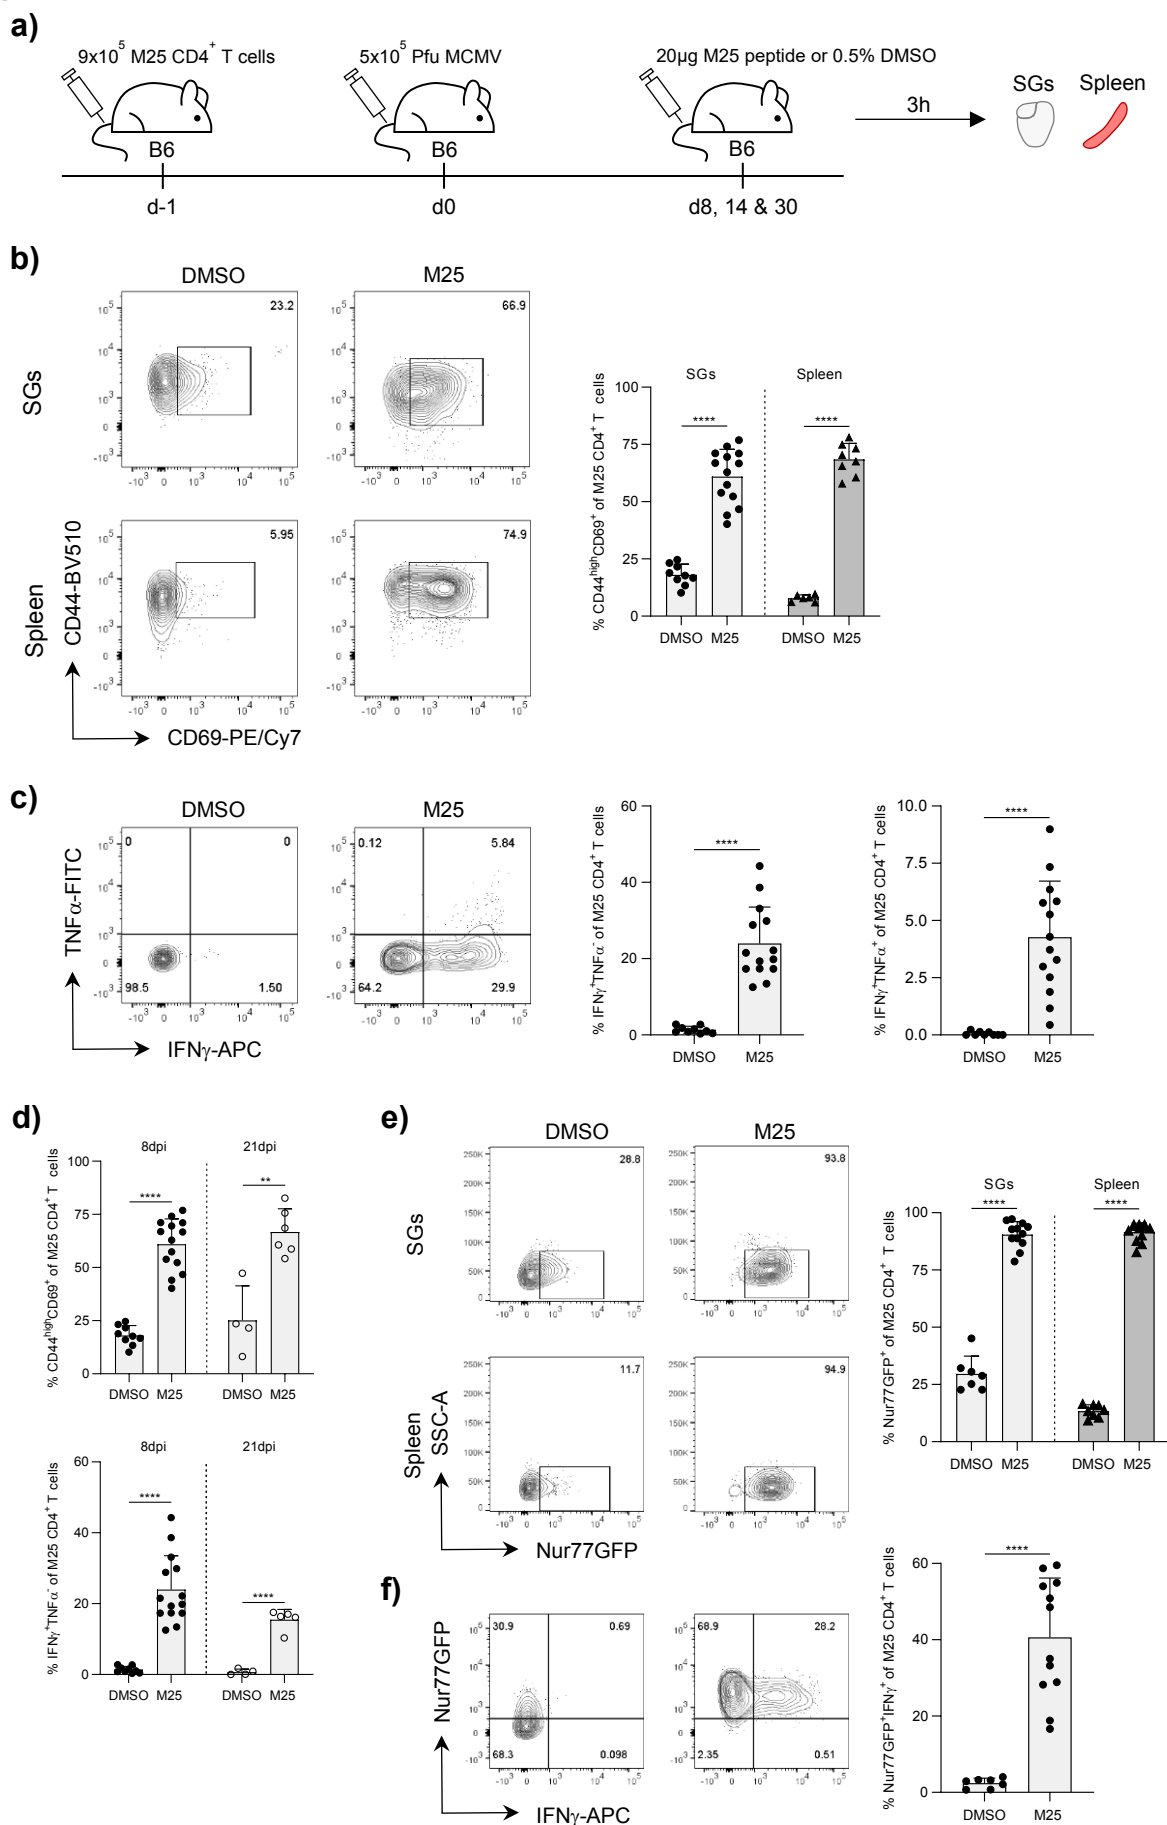

243 **Figure 2: IFN $\gamma$  production by SG-localized M25 CD4<sup>+</sup> T cells.** **a)** Experimental approach. 10<sup>6</sup>  
244 MACS purified M25 (Nur77GFP) CD4<sup>+</sup> T cells were adoptively transferred into naïve WT B6 mice  
245 one day prior MCMV infection and subsequently challenged for 3h with i.v. administered cognate  
246 M25 peptide or 0.5% DMSO as control at day 8 or 21 post MCMV infection. **b)** Representative  
247 flow cytometry contour plots (left) and quantification (right) of early activated CD44<sup>high</sup>CD69<sup>+</sup> M25  
248 CD4<sup>+</sup> T cells in the SGs and spleens 3h post M25 peptide or DMSO administration at day 8 post  
249 MCMV infection. **c)** Representative flow cytometry contour plots (left) and quantification (right) of  
250 IFN $\gamma$  and TNF $\alpha$  expression levels by M25 CD4<sup>+</sup> T cells in the SGs 3h post M25 peptide or DMSO  
251 administration at day 8 post MCMV infection. **d)** Percentage of CD44<sup>high</sup>CD69<sup>+</sup> (top) and IFN $\gamma$ <sup>+</sup>  
252 (bottom) M25 CD4<sup>+</sup> T cells 3h post M25 peptide or DMSO administration at day 8 and 21 post  
253 MCMV infection. **e)** Representative flow cytometry contour plots (left) and quantification (right) of  
254 Nur77GFP<sup>+</sup> M25 CD4<sup>+</sup> T cells in the SGs and spleens 3h post M25 peptide or DMSO challenge  
255 at day 8 post MCMV infection. **f)** Representative flow cytometry contour plots (left) and  
256 quantification (right) of Nur77GFP<sup>+</sup>IFN $\gamma$ <sup>+</sup> M25 CD4<sup>+</sup> T cells in the SGs 3h post M25 or DMSO  
257 challenge at day 8 post MCMV infection. Data in **b – f** are shown as mean + SD of n = 4 – 14 mice  
258 pooled from two (b: spleen and d: 21dpi) or three independent experiments. Each symbol  
259 represents an individual mouse. Statistical significance was determined using single (**c and f**) or  
260 multiple (**b, d and e**) unpaired two-tailed t test. \*\*P<0.01, \*\*\*\*P<0.0001.

261

262

263

264

265

266

267

268

269

270

271

272

273

274

275

276

277

278 **Entire cross section analysis of acutely MCMV-infected SGs reveals micro-anatomical**  
279 **localization of early infiltrating CD4<sup>+</sup> T cells**

280

281 Next, we studied the micro-anatomical localization of M25 and endogenous CD4<sup>+</sup> T cells in acutely  
282 MCMV infected SGs by adding another layer of information and resolution. For this purpose, we  
283 transferred traceable RFP-expressing M25 CD4<sup>+</sup> T cells (referred to as M25xRFP CD4<sup>+</sup> T cells)  
284 and subsequently infected mice with MCMV-GFP. Eight days post MCMV-GFP infection, we  
285 harvested the SGs and performed whole slide imaging (WSI), followed by in-depth spatial relation  
286 studies between SG-infiltrating CD4<sup>+</sup> T cells and large actively infected (GFP<sup>+</sup>) cells (sites of  
287 infectious virus production) using the quantitative image analysis software HALO (**Fig. 3a**). To  
288 prevent tissue damage, we carefully dissected, cut and imaged the tightly connected  
289 submandibular -and sublingual glands (SMGs and SLGs, respectively) together. Differences in  
290 structural features enabled the separation of the SGs into SMGs and SLGs (**Suppl. Fig. 2a**). By  
291 applying four-color entire cross section (ECS) analyses, we simultaneously visualized  
292 endogenous CD4<sup>+</sup> and M25 CD4<sup>+</sup> T cells, along with sites of viral replication. M25 CD4<sup>+</sup> T cells  
293 were readily identified by their co-expression of cytoplasmic RFP and the cell membrane CD4  
294 marker, whereas endogenous CD4<sup>+</sup> T cells were only positive for the latter. Sites of viral replication  
295 were identified by their "Owl's eye" appearance of well-known inclusion bodies (enlarged cells that  
296 are bright for the virus-encoded fluorescent reporter) (**Fig. 3b**)<sup>26</sup>. First, we analyzed total numbers  
297 of M25 CD4<sup>+</sup> T cells in the SMGs and SLGs and detected the majority of M25 CD4<sup>+</sup> T cells in the  
298 SMGs (**Fig. 3c**). However, this was not surprising since the SMGs encompass an approximately  
299 six times larger surface area than the SLGs (**Suppl. Fig. 2b**). Nevertheless, normalizing for the  
300 surface area also showed a higher density of M25 CD4<sup>+</sup> T cells in the SMGs (**Fig. 3c**). Next, we  
301 quantified the sites of viral replication across the sections and observed considerable  
302 heterogeneity, ranging from one to twelve sites of viral replication per SMG cross section (**Fig.**  
303 **3d**). As CD4<sup>+</sup> T cell density and number of infected cells were higher in the SMGs, we focused  
304 the ensuing spatial analyses to this part of the SGs. In this regard, we quantified distances  
305 between sites of viral replication and endogenous or M25 CD4<sup>+</sup> T cells by extracting data of  
306 interest from raw images and employing nearest neighbor analysis. Based on the distribution of  
307 measured distances, we quantified the frequencies of endogenous CD4<sup>+</sup> and M25 CD4<sup>+</sup> T cells  
308 residing within a defined radius from the next site of viral replication (**Suppl. Fig. 2c**). Proximity  
309 analyses revealed that most of the endogenous CD4<sup>+</sup> and M25 CD4<sup>+</sup> T cells were located 600 μm  
310 and more away from the next site of viral replication. However, the percentage of M25 CD4<sup>+</sup> T  
311 cells in relative close proximity to these infection foci ( $\leq 300 \mu\text{m}$ ) was significantly higher than the  
312 ones of the endogenous CD4<sup>+</sup> T cell compartment (**Fig. 3e**). Given the considerable differences

313 in numbers of viral replication sites per SMG section and the rather random distribution of M25  
314 CD4<sup>+</sup> T cells at 8 dpi, we expected a correlation between the proportion of M25 CD4<sup>+</sup> T cells  
315 residing within a radius of 300  $\mu$ m to the nearest site of viral replication and the total counts of  
316 sites of viral replication per ECS. Indeed, we discovered a tendency that the number of infection  
317 foci strongly influenced this frequency (**Fig. 3f**). However, a few tissue sections showed signs of  
318 virus-associated T cell clustering, noticeable by the high frequency of M25 CD4<sup>+</sup> T cells within 300  
319  $\mu$ m to a relatively low number of sites of viral replication (**Fig. 3f & g**). We further quantified the  
320 Euclidean distance between two closest endogenous CD4<sup>+</sup> and M25 CD4<sup>+</sup> T cells and observed  
321 slightly shorter distances between M25<sup>+</sup> CD4<sup>+</sup> T cells compared to the endogenous CD4<sup>+</sup> T cells  
322 (**Fig. 3e**). Generally, both CD4<sup>+</sup> T cell populations appeared to be distributed quite randomly and  
323 rarely showed signs of accumulation close to infection foci. Therefore, the variation in the average  
324 distances between two M25 CD4<sup>+</sup> T cells is mostly due to differences in cell densities, thus  
325 indicating that the total number of M25 CD4<sup>+</sup> T cells per tissue section has a stronger impact on  
326 the distances between these cells than distinct accumulation characteristics (**Fig. 3h**). Finally, *in*  
327 *vivo* short-term intravenous (i.v.) antibody labeling revealed that M25 CD4<sup>+</sup> T cells do not reside  
328 in close proximity to the circulation (**Suppl. Fig. 2d**). In summary, these results indicate that M25  
329 and endogenous CD4<sup>+</sup> T cells are not preferentially found in close proximity to sites of infection,  
330 but rather distribute randomly across the tissue of acutely MCMV-GFP infected SGs.

331

332

333

334

335

336

337

338

339

340

341

342

343

344

345

346

## Figure 3

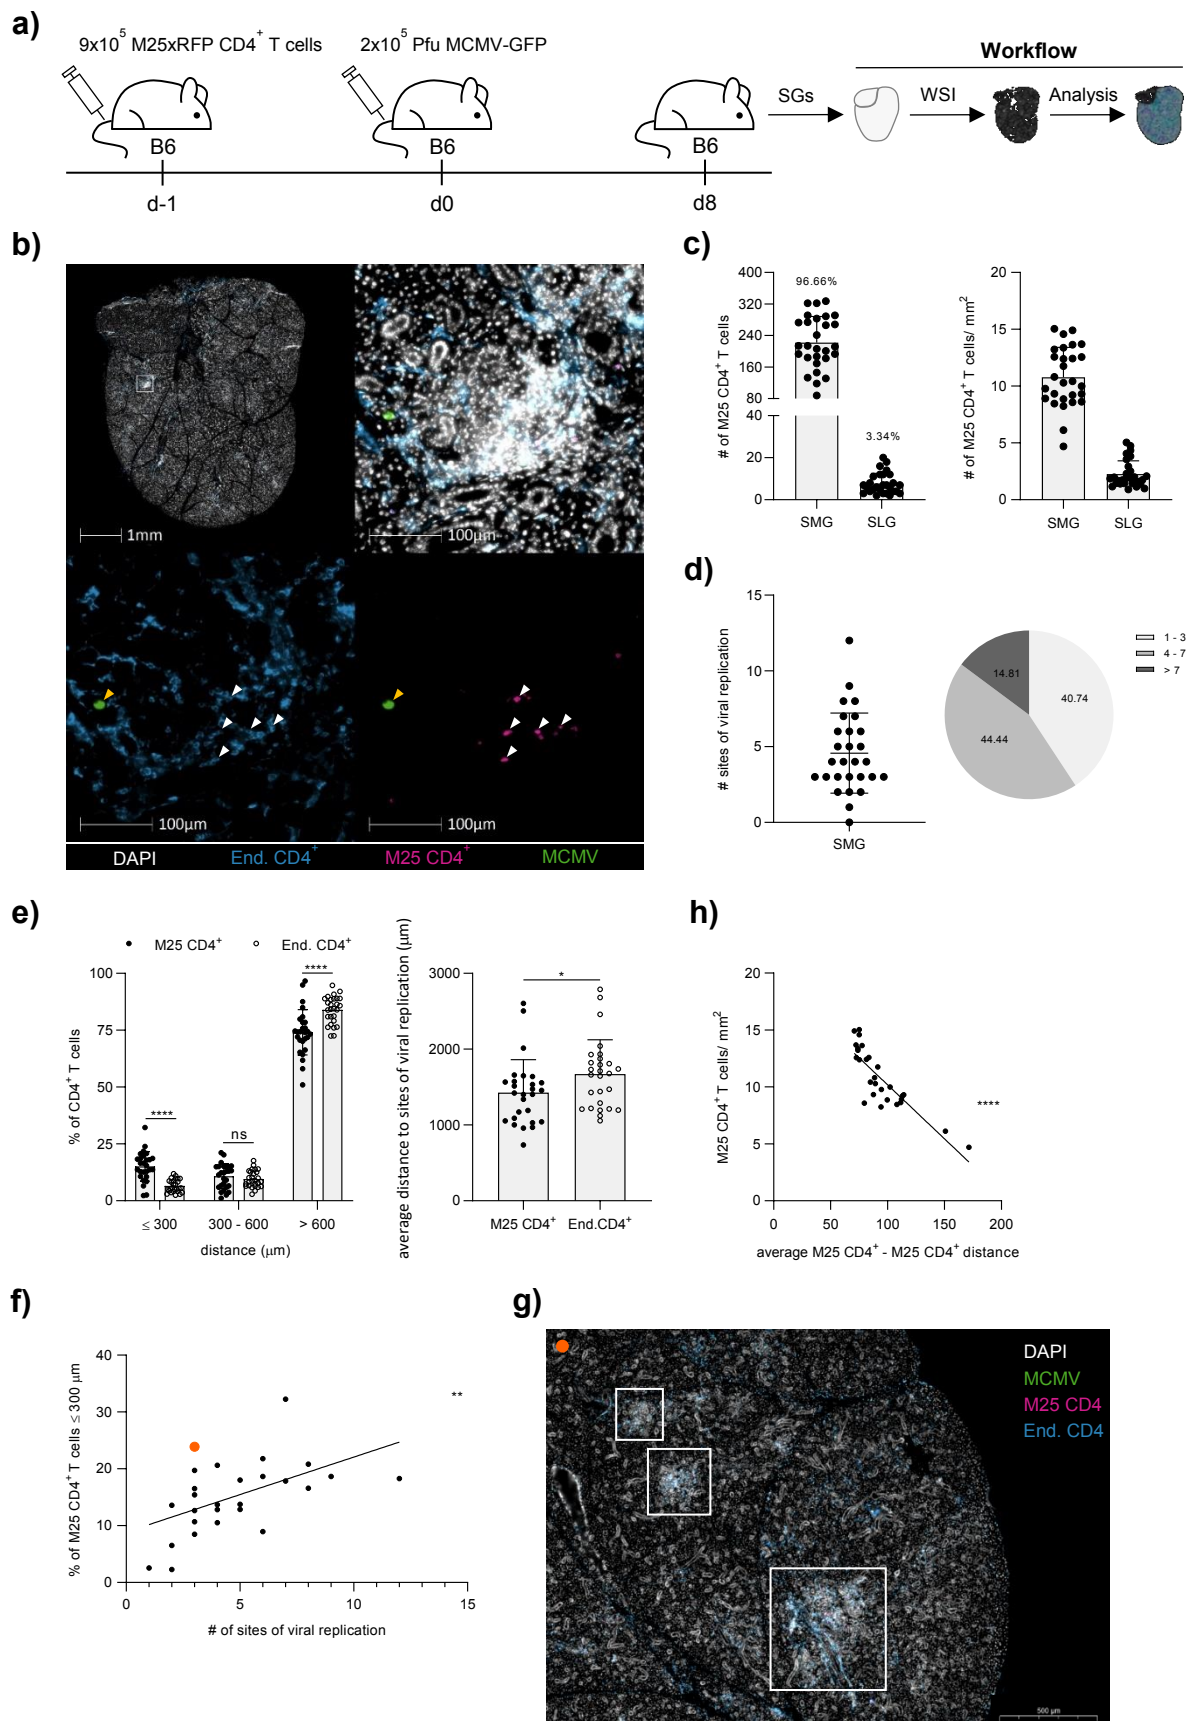

348 **Figure 3. Spatial localization of endogenous CD4<sup>+</sup> and M25 CD4<sup>+</sup> T cells in acutely MCMV**  
349 **infected SGs. a)** Experimental approach.  $9 \times 10^5$  MACS purified RFP traceable M25 CD4<sup>+</sup> T cells  
350 were adoptively transferred into naïve WT B6 mice one day prior MCMV-GFP infection. 8 days  
351 post MCMV-GFP infection, 10 $\mu$ m thin tissue sections of the SGs were sliced and subjected to  
352 whole slide imaging (WSI), followed by quantitative image analysis using the HALO<sup>®</sup> software. **b)**  
353 Example of an entire cross section (ECS) of the right SG lobe (upper left) with indicated magnified  
354 region (upper right). Endogenous CD4<sup>+</sup> T cells are shown in cyan (bottom left), M25 CD4<sup>+</sup> T cells  
355 are shown in magenta (bottom right, white arrowheads), and a site of viral replication is shown in  
356 green (bottom, yellow arrowhead). **c)** Total M25 CD4<sup>+</sup> T cell counts (left) and cell density (right) in  
357 the SMG and SLG. **d)** Number of sites of viral replications in the SMG (left) with the percental  
358 distribution (pie chart, right). **e)** Percentage of endogenous CD4<sup>+</sup> and M25 CD4<sup>+</sup> T cells located  
359 within a defined distance to the nearest infection foci (left) and summarized average distances of  
360 the endogenous CD4<sup>+</sup> and M25 CD4<sup>+</sup> T cells to these sites (right). **f)** Correlation between the  
361 number of infection foci per ECS and the percentages of M25 CD4<sup>+</sup> T cells located within 300  $\mu$ m  
362 away from the nearest infection foci. **g)** Cutout of an ECS of a B6 mouse-derived SG 8 days post  
363 MCMV-GFP infection. White frames highlight sites of T cell accumulations close to sites of active  
364 viral replication. Data point represented by the orange dot in **f)** corresponds to the cutout of the  
365 ECS in **g)**. **h)** Correlation between the cell densities of M25 CD4<sup>+</sup> T cells and the average in  
366 between distances per ECS. Data in **c – f & h)** are shown as mean + SD of n = 5 mice (2 -11 ECS  
367 per SG, total 28 ECS) pooled from two independent experiments. Each dot represents an  
368 individual ECS. Total 275'359 endogenous CD4<sup>+</sup> and 6'218 M25 CD4<sup>+</sup> T cells were analyzed.  
369 Statistical significance was determined using single (**e, right**) multiple (**e, left**) unpaired two-tailed  
370 t test, or two-tailed Pearson correlation (**f & h**). \*\*P<0.01, \*\*\*\*P<0.0001, ns = not significant. Scale  
371 bar in **b)** = 100  $\mu$ m and in **g)** = 500  $\mu$ m. SMG = Submandibular gland, SLG = Sublingual gland.

372  
373  
374  
375  
376  
377  
378  
379  
380  
381  
382

383 **CD4<sup>+</sup> T cells represent the major cellular source of IFN<sub>γ</sub> production in MCMV infected SGs**

384

385 The pro-inflammatory cytokine IFN<sub>γ</sub> was previously shown to be a crucial component of the  
386 antiviral control mechanism in MCMV infected SGs<sup>12</sup>. Therefore, we evaluated next which immune  
387 cell type present in the MCMV-infected SGs would preferentially produce the pivotal cytokine IFN<sub>γ</sub>.  
388 To this end, we made use of the IFN<sub>γ</sub> reporter mouse GREAT, which expresses the enhanced  
389 yellow fluorescence protein (EYFP) under the control of the IFN<sub>γ</sub> promoter<sup>27</sup>. In doing so, we  
390 investigated cell-specific and spatial IFN<sub>γ</sub> production in MCMV-3DR infected SGs. We infected  
391 GREAT mice with MCMV-3DR and determined which cell types were EYFP<sup>+</sup> (i.e. IFN<sub>γ</sub> producing)  
392 at 14 dpi. Compared to naïve GREAT mice, we observed significantly elevated EYFP signal levels  
393 upon MCMV-3DR infection (**Fig. 4a, suppl. Fig. 3a**). We then characterized the cell types within  
394 the EYFP positive cell fraction and identified CD3<sup>+</sup> cells as the primary cellular source of IFN<sub>γ</sub>  
395 production in MCMV infected SGs. A minor proportion was assigned to NK1.1<sup>+</sup> natural killer (NK)  
396 cells (**Fig. 4b, suppl. 3b**). Further classification of the EYFP<sup>+</sup>CD3<sup>+</sup> cell population revealed that ¾  
397 of these cells were CD4<sup>+</sup> T cells (**Fig. 4c, suppl. Fig. 3c**). Additionally, we measured EYFP signal  
398 intensities in total CD4<sup>+</sup>, CD8<sup>+</sup> and NK1.1<sup>+</sup> cells. Again, CD4<sup>+</sup> T cells showed the highest  
399 percentage of EYFP<sup>+</sup> cells, followed by NK cells and CD8<sup>+</sup> T cells (**Fig. 4d, suppl. Fig. 3d**). Next,  
400 we aimed to study IFN<sub>γ</sub> producing cells *in situ* by applying confocal microscopy. We therefore  
401 performed microscopic analyses of MCMV-3DR infected SGs to reveal spatial relations between  
402 IFN<sub>γ</sub>-producing CD4<sup>+</sup> and CD8<sup>+</sup> T cells and sites of viral replication. We simultaneously recorded  
403 CD4<sup>+</sup>, CD8<sup>+</sup> and EYFP<sup>+</sup> cells in various field of views (FOVs) of MCMV-3DR infected SGs  
404 containing at least one site of viral replication, and attributed each EYFP<sup>+</sup> cell to its corresponding  
405 cell type (**Fig. 4e & f**). In line with the flow cytometry analyses, CD4<sup>+</sup> T cells were the major cellular  
406 source of IFN<sub>γ</sub> production (**Fig. 4g**). Moreover, spatial analyses revealed that CD4<sup>+</sup> T cells tended  
407 to accumulate in dense clusters at 14 dpi, whereas CD8<sup>+</sup> T cells showed a more dispersed  
408 distribution, despite higher abundance (**Suppl. Fig. 3e**). Of note, additional microscopic analyses  
409 of MCMV-3DR-infected SGs from Nur77GFP mice further identified dense CD4<sup>+</sup> T cell clusters in  
410 vicinity to infectious virus production. This implies that accumulations of CD4<sup>+</sup> T cells close to sites  
411 of viral replication represent primary sites of antigen recognition, identifiable by a remarkable  
412 fraction of GFP expressing CD4<sup>+</sup> T cells. (**Fig. 4h & suppl. Fig. 3f & g**). Interestingly, we  
413 sometimes detected small structures containing the mcherry signal from the MCMV-3DR strain  
414 within these CD4<sup>+</sup> T cell accumulations, congruent with a high abundance of mainly EYFP<sup>+</sup> IFN<sub>γ</sub>  
415 producing CD4<sup>+</sup> T cells (**Fig. 4i**). In this regard, further microscopic analyses identified CD11c<sup>+</sup>  
416 APC as primary cell type harboring these small mcherry<sup>+</sup> remnants of MCMV-infected cells,

417 whereas active lytic viral replication was predominantly found within E-Cadherin<sup>+</sup> epithelial cells  
418 **(Suppl. Fig. 4a & b)**. These results strongly confirm previous findings from our lab, that the  
419 presentation of phagocytosed remnants (presumably apoptotic bodies containing viral proteins)  
420 from previously infected cells by CD11c<sup>+</sup> APCs lead to local CD4<sup>+</sup> T cell activation<sup>11</sup>. Thus, CD4<sup>+</sup>  
421 T cells rather recognize apoptotic cell-derived viral structures presented by APCs than directly  
422 infected epithelial cells. Taken together, these findings show that CD4<sup>+</sup> T cells are the major  
423 cellular source of IFN $\gamma$  production in MCMV-infected SGs, and that IFN $\gamma$ -producing CD4<sup>+</sup> T cells  
424 are found in dense clusters at 14 dpi, usually in close proximity to sites of active viral replication.  
425 Furthermore, local TCR triggering and IFN $\gamma$  production is often associated with the presence of  
426 CD11c<sup>+</sup> cells containing mcherry<sup>+</sup> inclusions - most likely remnants from infected cells, serving as  
427 antigen source for the activation of CD4<sup>+</sup> T cells.

428  
429  
430  
431  
432  
433  
434  
435  
436  
437  
438  
439  
440  
441  
442  
443  
444  
445  
446  
447  
448  
449  
450  
451



## Figure 4

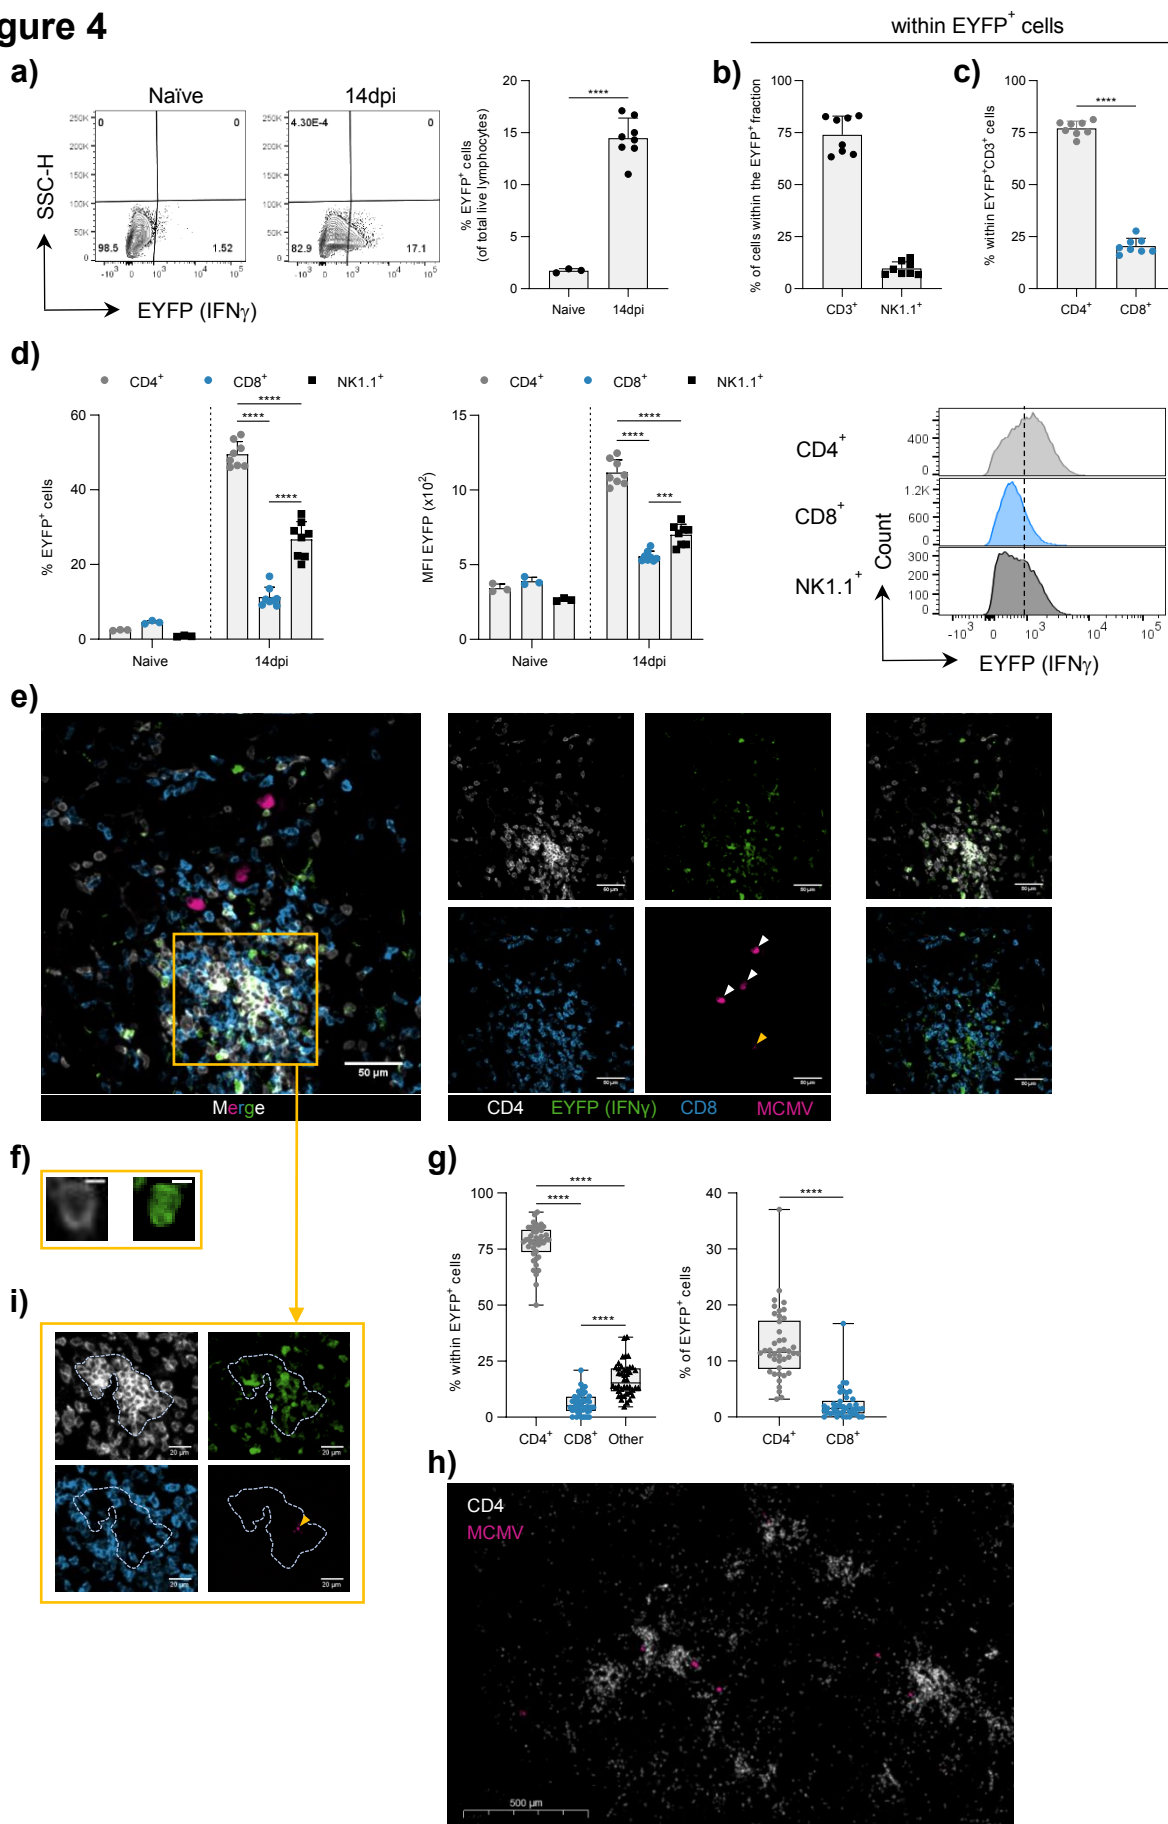

453 **Figure 4. IFN $\gamma$  production by CD4<sup>+</sup> T cells in MCMV infected SGs. a)** Representative flow  
454 cytometry contour plots of naïve and MCMV-3DR infected Great mice (left) and percentage of  
455 total EYFP<sup>+</sup> cells (right), **b)** percentage of CD3<sup>+</sup> and NK1.1<sup>+</sup> cells within EYFP<sup>+</sup> cells, and **c)**  
456 percentage of CD4<sup>+</sup> and CD8<sup>+</sup> T cells within CD3<sup>+</sup>EYFP<sup>+</sup> cells. **d)** Percentage of EYFP<sup>+</sup> cells within  
457 the indicated cell types (left) and the MFI of the EYFP signal (middle). Representative histograms  
458 of the EYFP expression profile in the indicated cell types 14dpi (right). Dashed line defines  
459 threshold for positive signal. **e)** Example of a four color FOV of a Great mouse-derived SG 14 days  
460 post MCMV-3DR infection (left). Single color channel images (middle), merged two color  
461 CD4/EYFP (right, upper row) and CD8/EYFP (right, lower row) images. **f)** Magnified IFN $\gamma$ <sup>+</sup> CD4<sup>+</sup>  
462 T cell (cytosolic EYFP and cell membrane CD4 signal). **g)** Quantification of microscopic analyses.  
463 Percentage of cell types within total counted EYFP<sup>+</sup> cells (left) and the frequency of EYFP<sup>+</sup> cells  
464 within CD4<sup>+</sup> and CD8<sup>+</sup> T cells (right) per FOV of MCMV-3DR infected SGs 14dpi. **h)** Cutout of an  
465 ECS of a Nur77GFP mouse-derived SG 14 days post MCMV-3DR infection. **i)** Magnified region  
466 split in four single color channel images. Dashed line demarcates dense accumulation of  
467 preferentially IFN $\gamma$ <sup>+</sup> CD4<sup>+</sup> T cells in close proximity to faint mcherry signal (yellow arrowhead).  
468 Data in **a – d** and are shown as mean  $\pm$  SD of n = 3 naïve and n = 8 infected Great mice pooled  
469 from 2 independent experiments. Data in **g** are shown as box and whiskers showing all points  
470 from Min. to Max. (n = 42 FOVs with n > 6 per mice) of n = 3 mice from one independent  
471 experiment. Each symbol in **a – d** represents one individual mouse and in **g** one individual FOV.  
472 Statistical significance was determined using single unpaired two-tailed t test (**a – c** and **g: right**),  
473 or 2-way Anova with post hoc Tukey's multiple comparisons test (**d and g: left**). \*\*\*P<0.001,  
474 \*\*\*\*P<0.0001. Scale bar in **e** = 50  $\mu$ m, in **f** = 5  $\mu$ m, in **h** = 100  $\mu$ m and in **i** = 20  $\mu$ m. White and  
475 yellow arrowheads in **e** and **i** indicate infection foci and presumably cargo/ remnants of infected  
476 cells, respectively. FOV = Field of view.

477

478

479

480

481

482

483

484

485

486

487

488 **3D confocal imaging provides a new level of information regarding the CD4<sup>+</sup> T cell - MCMV**  
489 **interaction**

490

491 Classical FOV analyses along with the WSI approach allowed us to investigate antiviral immune  
492 responses in MCMV infected SGs in two dimensions; however, organs are intrinsically built up in  
493 three dimensions. Moreover, the considerable heterogeneity of number of sites of viral replication,  
494 together with their anatomical location and complex interrelation with CD4<sup>+</sup> T cells, required a  
495 more profound three-dimensional (3D) examination of the tissue sample. Furthermore, dense  
496 clusters of CD4<sup>+</sup> T cells surrounding virus-associated small structures needed to be confirmed  
497 and explored in more detail. For this purpose, we elaborated a clearing-based 3D confocal  
498 microscopy pipeline for 200 µm thick tissue sections (**Fig. 5a**)<sup>28,29</sup>. In doing so, PFA fixed MCMV-  
499 3DR infected SGs were first embedded in agarose and subsequently sliced at appropriate  
500 thickness using a vibrating microtome. Tissue sections were then stained, optically cleared, and  
501 imaged using an inverted confocal microscope. Finally, 3D reconstructions composed of  
502 sequentially acquired 2D-stacked images were processed and visualized, followed by in-depth  
503 spatial analyses. As proof, tissue clearing with the histodenz-based refractive index (RI) matching  
504 solution (RIMS) substantially increased imaging depth up to 200 µm, allowing the precise  
505 identification of several sites of viral replication and the truthful evaluation of CD4<sup>+</sup> T cell counts  
506 (**Fig. 5b & Suppl. Video 1**). Furthermore, and in line with observations from the 2D images,  
507 specific FOVs at different z-planes revealed the emergence and disappearance of accumulating  
508 CD4<sup>+</sup> T cells around small virus-associated structures, whereas closely situated large infection  
509 foci seemed to be ignored (**Fig. 5c**). Nearest neighbor analysis further confirmed the observation  
510 that a relevant number of CD4<sup>+</sup> T cells are in close proximity to many of these small mcherry<sup>+</sup>  
511 remnants, which presumably represent apoptotic bodies released from previously infected cells  
512 (**Fig. 5d, Suppl. Fig. 4c & Video 2**). Image segmentation of actively MCMV-3DR-infected cells  
513 and small virus-associated structures derived from infected cells revealed different morphological  
514 appearances (**Fig. 5e & suppl. Fig. 4c**). As previously indicated (**Suppl. Fig. 4a & b**), small  
515 mcherry<sup>+</sup> virus-associated remnants were frequently found within CD11c<sup>+</sup> APCs (≈ 30%), most  
516 likely as a result of phagocytic activity (**Suppl. Video 3**). In contrast, large actively infected cells  
517 were only assigned to E-Cadherin<sup>+</sup> epithelial cells, again confirming previous knowledge that  
518 acinar glandular epithelial cells represent the preferred cell type in the SGs for infectious virus  
519 production (**Fig. 5f & g**). Importantly, unassigned mcherry signals of small volumes might be cell-  
520 free (not yet phagocytosed) or found within other cell types, for instance in CD11b<sup>+</sup> cells (**Suppl.**  
521 **Fig. 4d**) In summary, 3D confocal imaging confirmed that dense accumulations of CD4<sup>+</sup> T cells

522 are often associated with APCs that harbor cargo from previously virus-infected cells, likely  
523 remnants or apoptotic bodies (**Suppl. Video 4**).

524

525

526

527

528

529

530

531

532

533

534

535

536

537

538

539

540

541

542

543

544

545

546

547

548

549

550

551

552

553

554

555

556

## Figure 5

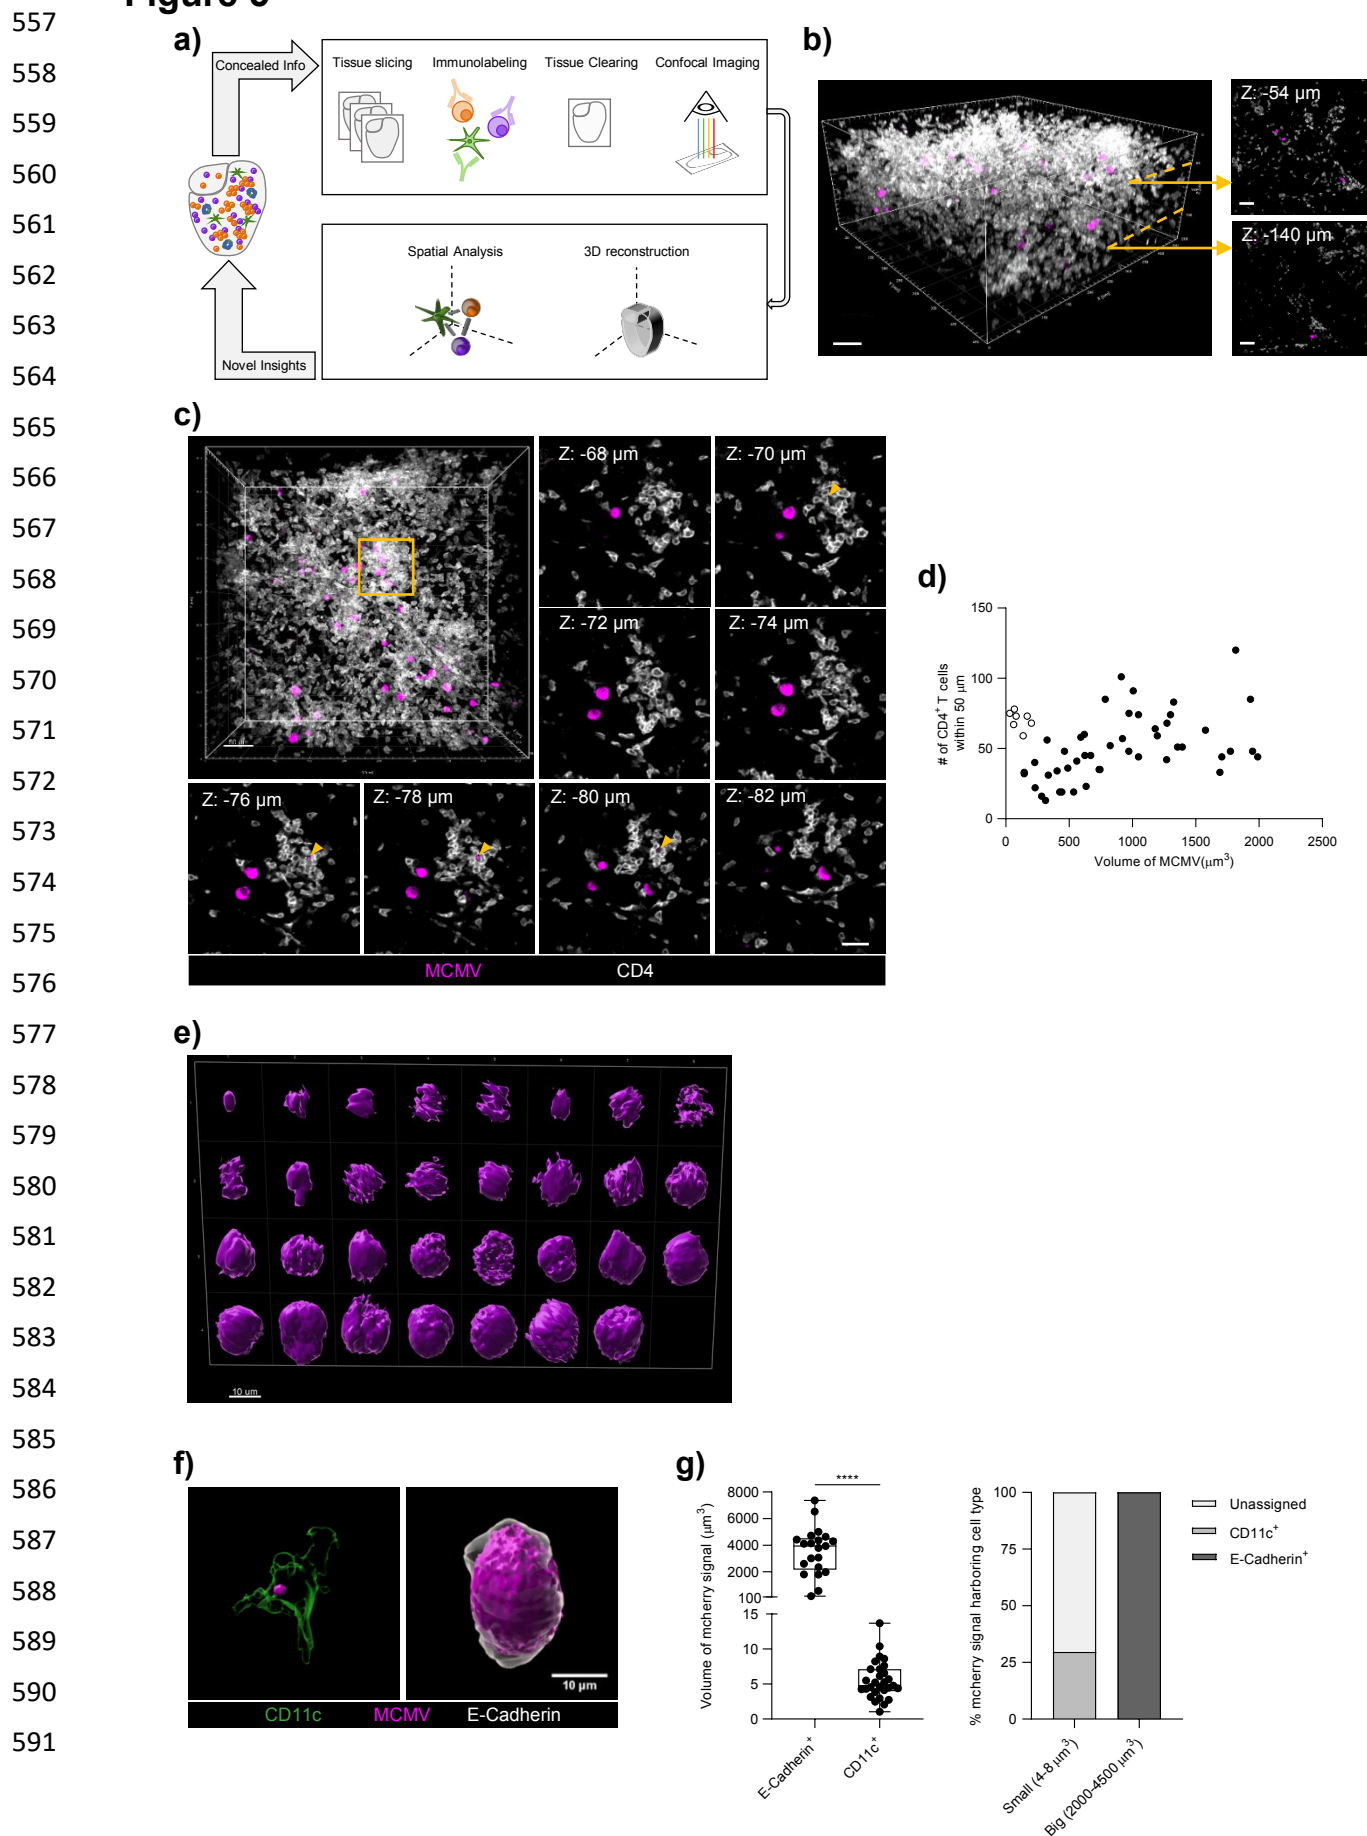

592 **Figure 5. 3D Imaging of MCMV-infected SGs. a)** Schematic overview of our 3D imaging pipeline.  
593 **b)** Confocal imaging depth of an optically cleared SG sample. **c)** 3D global view (450  $\mu\text{m}$  x 450  
594  $\mu\text{m}$  x 200  $\mu\text{m}$ ) of a 200  $\mu\text{m}$  thick SG section (left, top) with magnified 2D sections at indicated z-  
595 positions from the outlined FOV (yellow frame). Yellow arrowheads show MCMV-3DR-associated  
596 faint mcherry signal. **d)** MCMV-3DR volume plotted against the number of CD4<sup>+</sup> T cells within 50  
597  $\mu\text{m}$  to each mcherry signal. Dashed circle demarcates potential remnants of previously MCMV-  
598 3DR infected cells with high abundance of CD4<sup>+</sup> T cells (open dots) **e)** Morphological variability of  
599 MCMV-3DR-associated mcherry signals from FOV represented in **c**, ordered by volume from top  
600 left to down right. **f)** 3D reconstructions of MCMV-3DR-associated mcherry signal within a CD11c<sup>+</sup>  
601 and an E-Cadherin<sup>+</sup> cell 14 dpi. **g)** Volume of MCMV-3DR-associated mcherry signal in E-  
602 Cadherin<sup>+</sup> and CD11c<sup>+</sup> cells 14 dpi (left). Percentage of E-Cadherin<sup>+</sup> and CD11c<sup>+</sup> cells harboring  
603 small (4-8  $\mu\text{m}^3$ ) and big (2000-4500  $\mu\text{m}^3$ ) volumes of MCMV-3DR-associated mcherry signal 14  
604 dpi (right). Data in **d** are shown as dots of n = 54 MCMV-3DR reporting mcherry signal pooled  
605 from 2 FOVs of one independent experiment. Data in **g** are shown as dots of MCMV-3DR reporting  
606 mcherry signals in n = 21 E-Cadherin<sup>+</sup> cells and n = 28 in CD11c<sup>+</sup> cells and as percentage of n =  
607 103 small and n = 21 big MCMV-3DR reporting mcherry signals pooled from 9 FOVs of 3  
608 independent experiments. Statistical significance was determined using single unpaired two-tailed  
609 t test (**g**). \*\*\*\*P<0.0001. Scale bar in **b** = 50  $\mu\text{m}$ , in **c** = 50  $\mu\text{m}$  (3D global view) and 30  $\mu\text{m}$   
610 (magnified 2D FOVs), in **e** = 10  $\mu\text{m}$  and in **f** = 10  $\mu\text{m}$ . FOV = Field of view.

611

612

613

614

615

616

617

618

619

620

621

622

623

624

625

626

627 **The chemokines CXCL9 and CXCL10 act as chemoattractants in guiding CXCR3-**  
628 **competent T cells to site of infection**

629  
630 In-depth confocal imaging analysis revealed a preferred clustering behavior of CD4<sup>+</sup> T cells in  
631 vicinity to sites of infection, and identified further remnants from virus-infected cells as primary  
632 antigenic source for IFN $\gamma$  production. To determine the range in which secreted IFN $\gamma$  would be  
633 sensed in this glandular tissue in order to induce an antiviral state, we analyzed the expression of  
634 the known IFN $\gamma$ -inducible chemokines CXCL9 and CXCL10 upon MCMV infection using the  
635 CXCR3-ligand reporter mouse Rex3<sup>30</sup>. In Rex3 mice, CXCL9 and CXCL10 positive cells can  
636 simultaneously be detected by concomitant expression of the RFP and blue fluorescent protein  
637 (BFP), respectively. Firstly, we i.v. infected Rex3 mice with MCMV-GFP. 60% of CD45.2<sup>+</sup>  
638 hematopoietic cells expressed CXCL10 in naïve SGs, which unexpectedly remained constant  
639 following viral infection (**Fig. 6a**). In contrast, only CD31<sup>+</sup> blood vessel constituting endothelial cells  
640 from the CD45.2<sup>-</sup> non-hematopoietic cell fraction significantly upregulated CXCL10 in response to  
641 MCMV-GFP infection, whereas CXCL10 expression levels by CD326<sup>+</sup> duct forming epithelial cells  
642 and CD31<sup>-</sup>CD326<sup>-</sup> stromal cells were hardly affected by the infection (**Fig 6a, suppl. Fig. 5a-c**).  
643 Furthermore, 70-80% of SGs-resident and half of spleen-localized CD11c<sup>+</sup>MHCII<sup>+</sup> APCs were  
644 single CXCL10 positive, and only a minority co-expressed CXCL9 and CXCL10 (**Suppl. Fig. 5d**).  
645 Additionally, most APCs in the SGs were positive for the macrophage-specific marker F4/80  
646 (**Suppl. Fig. 5e**). Next, we performed microscopic analysis to uncover the spatial relationship  
647 between SG-infiltrating CD4<sup>+</sup> T cells, sites of viral replication, and the presence of CXCL9 and  
648 CXCL10 positive cells. Of particular importance, CD4<sup>+</sup> T cells were frequently found in small  
649 discrete clusters along with CXCL9 and CXCL10-expressing cells. As observed before, these  
650 accumulations were not localized in immediate vicinity to sites of viral replication, but rather within  
651 close proximity (**Fig. 6b**). To elucidate whether CXCL9 and CXCL10 served as proxy for IFN $\gamma$   
652 downstream signaling or as chemoattractants, or both, we followed two approaches. In a first  
653 experiment, we examined CXCL9 and CXCL10 expression as potential readout for IFN $\gamma$  sensing.  
654 For this purpose, we adoptively co-transferred either IFN $\gamma$ -competent (IFN $\gamma$ <sup>+/+</sup>) CD4<sup>+</sup> and CD8<sup>+</sup> T  
655 cells or IFN $\gamma$ -deficient (IFN $\gamma$ <sup>-/-</sup>) CD4<sup>+</sup> and IFN $\gamma$ -competent CD8<sup>+</sup> T cells into T cell-deficient Rex3  
656 mice (Rex3 x TCR $\beta$ <sup>KO</sup>) one week prior to MCMV-GFP infection and harvested the SGs and  
657 spleens 14 or 45 dpi (**Suppl. Fig. 5f**). Fourteen days post MCMV-GFP infection, we observed  
658 similar numbers of SG-infiltrating CD4<sup>+</sup> and CD8<sup>+</sup> T cells (**Suppl. Fig. 5g**). Although CD4<sup>+</sup> T cells  
659 account for nearly 80% of all IFN $\gamma$  producing cells in MCMV-infected SGs (**Fig. 4c & g**), transfer  
660 of IFN $\gamma$ <sup>-/-</sup> CD4<sup>+</sup> T cells did not significantly alter CXCL9 and CXCL10 expression levels in diverse

661 non-hematopoietic cell types in the SGs as well as in CD11c<sup>+</sup>MHCII<sup>+</sup> APCs in the SGs and spleens  
662 **(Suppl. Fig. 6a & b)**. Moreover, IFN $\gamma$ <sup>-/-</sup> CD4<sup>+</sup> T cells still assembled together with CXCL9 and  
663 CXCL10 expressing cells, developing distinct clusters **(Fig. 6c)**. The lack of IFN $\gamma$ <sup>+/+</sup> CD4<sup>+</sup> T cells  
664 resulted only in a slight increase in viral loads 14 days post MCMV-GFP infection with no  
665 significant difference at 45 dpi, shortly after the peak of the infection in the SGs **(Fig. 6d, suppl.**  
666 **Fig. 1h)**. In a second experiment, we explored the role of CXCL9 and CXCL10 as possible  
667 chemoattractants for CXCR3 expressing T cells. By using a competitive model, we investigated  
668 the infiltration and localization properties of CXCR3-competent (CXCR3<sup>+/+</sup>) versus CXCR3-  
669 deficient (CXCR3<sup>-/-</sup>) CD4<sup>+</sup> T cells in the SGs upon MCMV infection. For this purpose, we adoptively  
670 co-transferred CD45.2<sup>+</sup>CXCR3<sup>-/-</sup> and CD45.1<sup>+</sup>CXCR3<sup>+/+</sup> CD4<sup>+</sup> T cells together with  
671 CD45.1<sup>+</sup>CXCR3<sup>+/+</sup> CD8<sup>+</sup> T cells into Rex3 x TCR $\beta$ <sup>KO</sup> mice. Seven days post T cell transfer, we i.v.  
672 infected mice with MCMV and examined the SGs *in situ* at 14 dpi **(Suppl. Fig. 6c)**. In line with  
673 previous results **(Fig. 6b and c)**, CD4<sup>+</sup> T cells were predominantly found in clearly visible  
674 accumulations, showing a very strong colocalization with CXCL9 and CXCL10 expressing cells  
675 **(Fig. 6e)**. Of note, distinction between CXCR3<sup>+/+</sup> and CXCR3<sup>-/-</sup> CD4<sup>+</sup> T cells based on the congenic  
676 marker CD45.1 demonstrated that predominantly CXCR3<sup>+/+</sup>CD4<sup>+</sup> T cells were present within these  
677 "CXCL9 and CXCL10 hotspots", whereas CXCR3<sup>-/-</sup> CD4<sup>+</sup> T cells appeared to be rather randomly  
678 distributed **(Fig. 6f)**. This suggests that CXCR3 enables migration of T cells towards CXCL9 and  
679 CXCL10 positive cells within the SGs. However, CXCR3 expression was not a prerequisite for the  
680 entry into MCMV-infected SGs, and did not have an impact on the phenotype of CD4<sup>+</sup> T cells  
681 **(Suppl. Fig. 6d & e)**. This latter observation confirms previous findings that showed a redundant  
682 role of CXCR3 expression for T cell infiltration into MCMV-infected SGs<sup>31</sup>. Together, these data  
683 indicate that CXCL9 and CXCL10-expressing cells in MCMV-infected SGs possess a crucial role  
684 in guiding and positioning CXCR3 expressing T cells, and that the presence of IFN $\gamma$ -deficient CD4<sup>+</sup>  
685 T cells neither compromise expression levels of these chemokines nor have an impact on virus  
686 control around the peak of viral load in the SGs 45 dpi.

687  
688  
689  
690  
691  
692  
693  
694  
695



## Figure 6

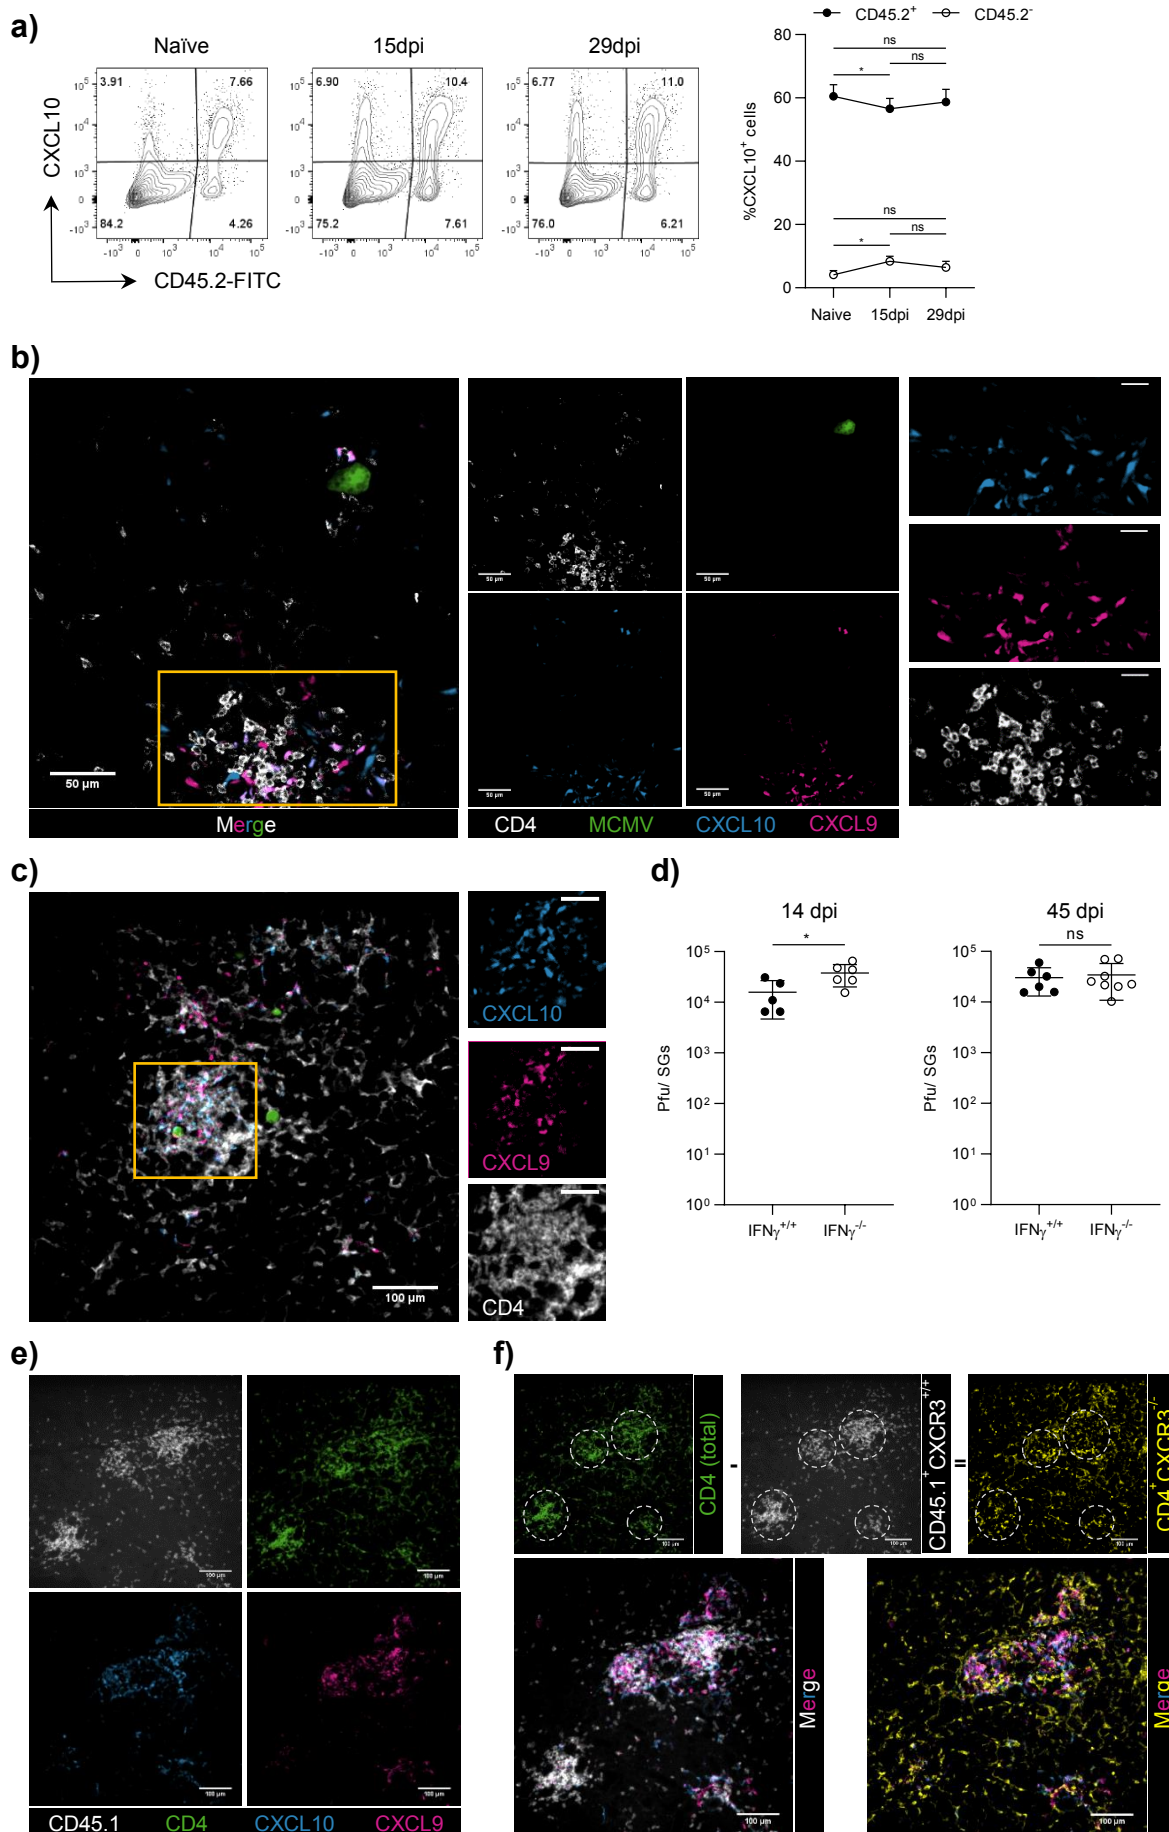

697 **Figure 6. CXCL9 and CXCL10 expression in MCMV-infected SGs.** **a)** Representative flow  
698 cytometry contour plots of naïve and MCMV-GFP infected Rex3 mice (left) and percentage of  
699 CXCL10<sup>+</sup> hematopoietic (CD45.2<sup>+</sup>) and non-hematopoietic (CD45.2<sup>-</sup>) cells at indicated days post  
700 MCMV-GFP infection (right). **b)** Example of a four color FOV of a Rex3 mouse-derived SG 15  
701 days post MCMV-GFP infection (left). Four single color channel images (middle) and magnified  
702 region (yellow frame) split in three single color channel images (right). **c)** Example of a four color  
703 FOV of a Rex3 x TCRβ<sup>-/-</sup> mouse-derived SG harboring IFNγ<sup>-/-</sup> CD4<sup>+</sup> T cells 14 days post MCMV-  
704 GFP infection (left) with magnified region (yellow frame) split in three single color channel images  
705 (right). **d)** Virus loads in the SGs of TCRβ<sup>-/-</sup> mice harboring IFNγ competent (IFNγ<sup>+/+</sup>) or IFNγ  
706 deficient (IFNγ<sup>-/-</sup>) CD4<sup>+</sup> T cells 14 and 45 dpi. **e)** Example of a four single color FOV of a Rex3 x  
707 TCRβ<sup>-/-</sup> mouse-derived SG harboring CXCR3 competent (CD45.1<sup>+</sup>CXCR3<sup>+/+</sup>) and CXCR3  
708 deficient (CD45.2<sup>+</sup>CXCR3<sup>-/-</sup>) CD4<sup>+</sup> T cells. **f)** Upper row: Image subtraction. Lower row: Merged  
709 three color CD45.1<sup>+</sup>CXCR3<sup>+/+</sup>/CXCL9/CXCL10 (left) and CD4<sup>+</sup>CXCR3<sup>-/-</sup>/CXCL9/CXCL10 (right)  
710 images. Data in **a** are shown as mean + SD of n = 6 - 8 Rex3 mice pooled from two independent  
711 experiments. Data in **d** are shown as mean ± SD of n = 5 - 6 TCRβ<sup>-/-</sup> mice pooled from two  
712 independent experiments. Each dot represents either the mean of pooled mice (**a**) or one  
713 individual mouse (**d**). Statistical significance was determined using 2-way Anova with post hoc  
714 Tukey's multiple comparisons test (**a**) or single unpaired two-tailed t test (**d**). \*P<0.05, ns = not  
715 significant. Scale bar in **b** = 50 μm (left and middle) and 20 μm (right), in **c** = 100 μm (left) and 50  
716 μm (right), in **e** and **f** = 100 μm.

717

718

719

720

721

722

723

724

725

726

727

728

729

730

731

732 **Mathematical modeling supports eventual viral control by confined local IFN $\gamma$  production**  
733 **of CD4 $^+$  T cells in the SGs**

734  
735 To determine if locally confined IFN $\gamma$  release by CD4 $^+$  T cells can eventually lead to area-wide  
736 control of MCMV infection in the SGs, we combined experimental data with a mathematical model  
737 that simulates the interaction of immune and infection processes. Using a cellular Potts modeling  
738 framework that allows us to follow the dynamics and motility of individual cells over time, we  
739 recapitulated the tissue structure and main cell types within the SMG. The multi-scale model  
740 considers the turnover and infection of epithelial cells, including intracellular viral replication and  
741 extracellular viral spread, as well as the infiltration, migration and locally confined IFN $\gamma$  production  
742 by endogenous CD4 $^+$  and M25 CD4 $^+$  T cells (**Fig. 7a & b**). Depending on the IFN $\gamma$  concentration  
743 in their surrounding, viral replication of infected cells is inhibited and infected cells are lost.  
744 Individual processes and model components were parameterized according to previous data from  
745 the literature and adapted to the experimental data. Simulating a total area of 800 $\times$ 800  $\mu\text{m}^2$ , our  
746 model represents roughly 1/30 of a 2D cross section of the SMG. For a detailed description of the  
747 model and its parameterization please refer to **Materials & Methods** and the detailed **Supp.**  
748 **Information Text S1 – Mathematical model.**

749 Our simulations show that after an initial increase in the number of infected cells and total viral  
750 load, peaking around 20-30 dpi, local IFN $\gamma$  secretion by infiltrating CD4 $^+$  T cells can eventually  
751 control viral infection in the SGs 45-60 dpi (**Fig. 7c & d**), similar to the experimental data. In this  
752 regard, a model that includes attraction of CD4 $^+$  T cells to CXCL9 and CXCL10 positive tissue  
753 areas populated with APCs, which engulf remnants of previously infected cells, contributes to  
754 reduced pathology and faster immune control of the MCMV infection. In contrast, a scenario that  
755 does not consider this chemical gradient-mediated migration behavior of CD4 $^+$  T cells, but rather  
756 assumes an undirected motion of CD4 $^+$  T cells (i.e. w/o APCs), is associated with an elevated and  
757 less controlled viral burden. The former scenario leads to increased clustering properties of CD4 $^+$   
758 IFN $\gamma^+$  T cells (**Fig. 7e**), with the majority of M25 CD4 $^+$  T cells accumulating in close proximity to  
759 actively MCMV infected cells (**Fig. 7f**). However, IFN $\gamma$ -producing CD4 $^+$  T cells are not directly  
760 located next to sites of active viral replication, which is in line with the experimental observations  
761 (**Fig. 4e & 7g**). Of note, IFN $\gamma$  producing CD4 $^+$  T cells do not show signs of clustering and are more  
762 heterogeneously distributed if the relevant contribution of APCs is ignored (**Fig. 7e**). Next,  
763 clustering of CD4 $^+$  T cells by APCs enables a concerted release of IFN $\gamma$  by several CD4 $^+$  T cells,  
764 which leads to increased local cytokine concentrations (**Fig. 7h**). In doing so, the accumulation of  
765 IFN $\gamma$ -protected sites over time finally leads to viral control in the entire simulated tissue section.

766 As our model assumes a restricted effective range for  $\text{IFN}\gamma$  released by  $\text{CD4}^+$  T cells with a at  
767 least 10%-chance to inhibit viral replication up to a radius of roughly  $\sim 30 \mu\text{m}$  around the cell,  
768 individual  $\text{CD4}^+$  T cells are less effective in controlling active viral replication. Therefore, in case  
769 of not provoking accumulations of  $\text{CD4}^+$  T cells by APCs,  $\text{IFN}\gamma$  concentrations are generally lower  
770 and more transient, mediating less efficient control of the infection (**Fig. 7c, d & h**).

771 Thus, our model shows that accumulations of  $\text{CD4}^+$  T cells by CXCL9/CXCL10 chemotactic  
772 gradients increases the efficiency of confined  $\text{IFN}\gamma$  release by individual  $\text{CD4}^+$  T cells, which confer  
773 improved regional-confined tissue protection and eventual viral control.

774

775

776

777

778

779

780

781

782

783

784

785

786

787

788

789

790

791

792

793

794

795

796

797

798

799

800

801 **Figure 7**

802

803

804

805

806

807

808

809

810

811

812

813

814

815

816

817

818

819

820

821

822

823

824

825

826

827

828

829

830

831

832

833

834

835

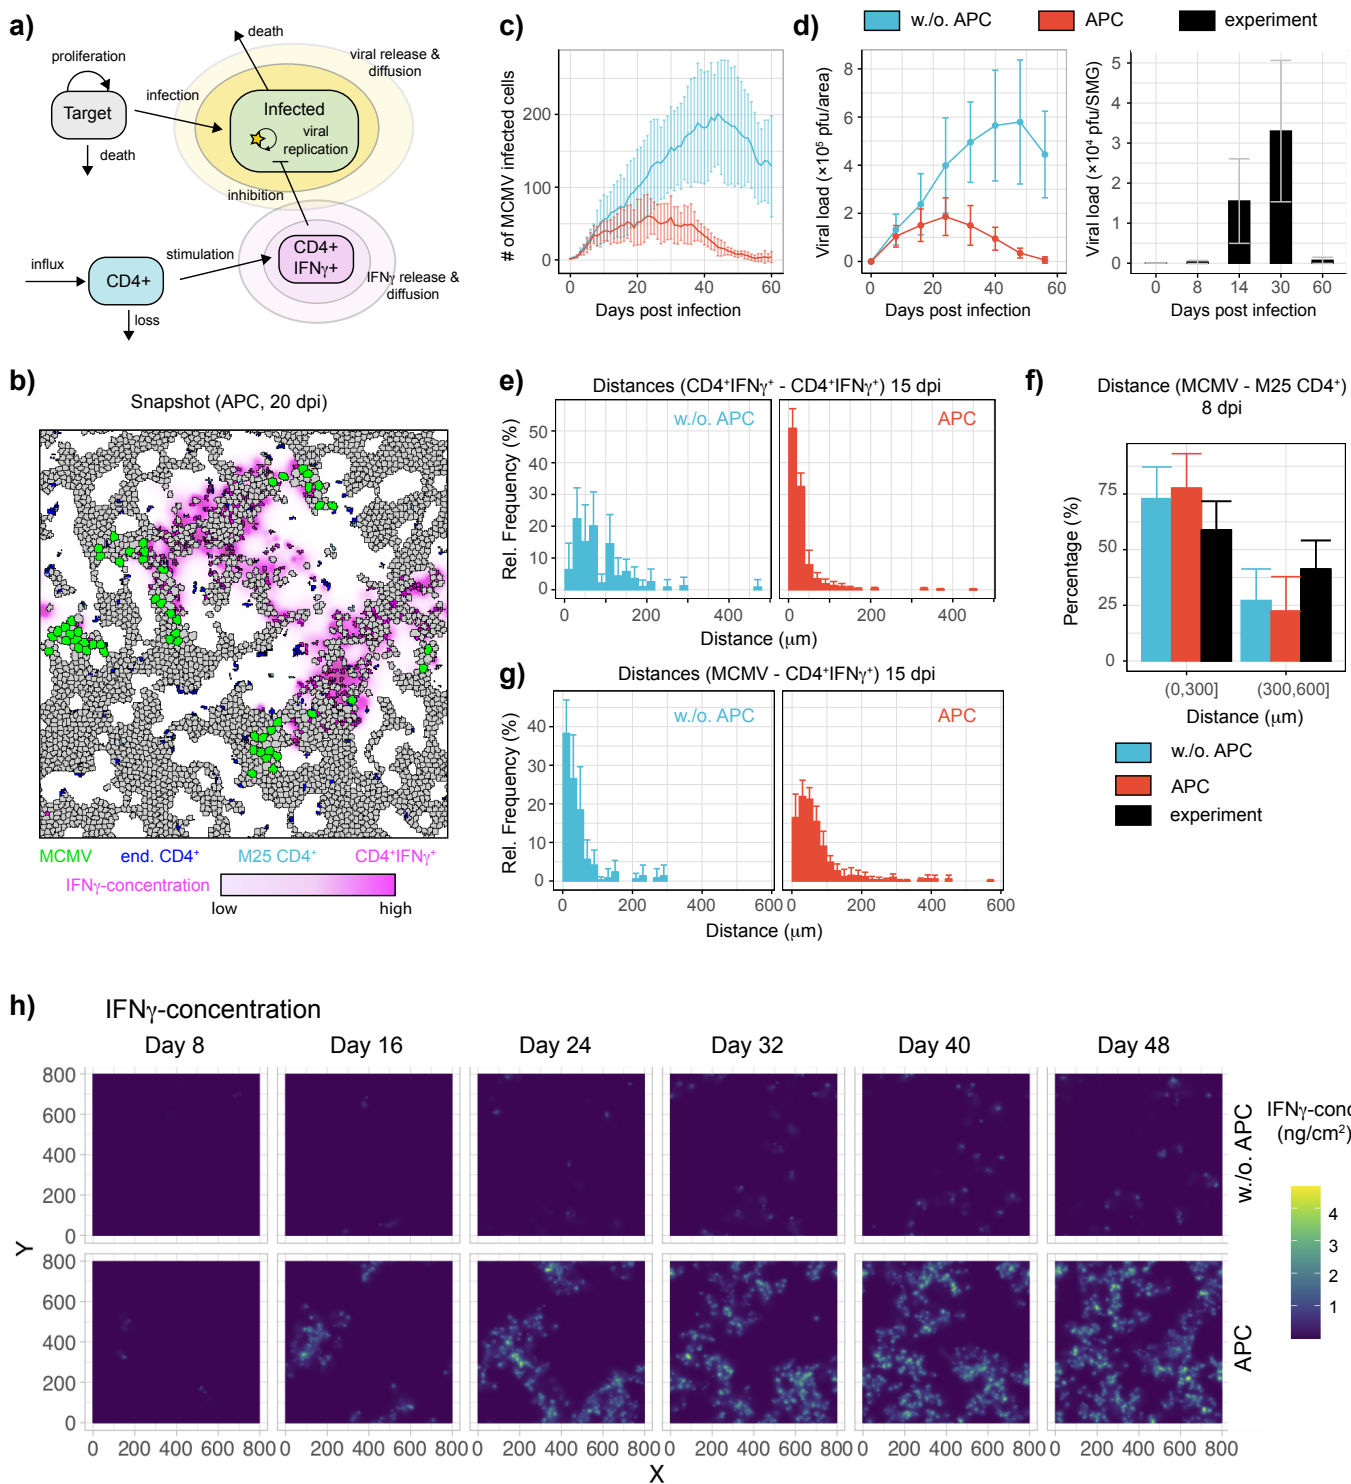

836 **Figure 7. Mathematical modeling of viral-immune interactions in the SGs. a)** Sketch of the  
837 main processes considered within the mathematical model. **b)** Snapshot of the modeled SMG  
838 tissue area of  $800 \times 800 \mu\text{m}^2$  at 20 dpi considering APC related guidance of  $\text{CD4}^+$  T cells. The plot  
839 indicates the non-duct areas with uninfected (grey) and active MCMV harboring (green) epithelial  
840 cells, as well as endogenous  $\text{CD4}^+$  (blue) and M25  $\text{CD4}^+$  T cells (light blue).  $\text{CD4}^+$   $\text{IFN}\gamma^+$  T cells  
841 are shown in pink with  $\text{IFN}\gamma^+$  concentrations indicated by the same, gradient color. **c and d)**  
842 Dynamics of the number of infected (MCMV<sup>+</sup>) cells (**c**) and viral load (**d**) for scenarios with (red)  
843 and without (blue) APC-associated CXCL9/CXCL10 attraction of  $\text{CD4}^+$  T cells. Experimental data  
844 show the viral load for the whole SMG (n= 8-9 mice, mean $\pm$ SD). **e)** Clustering of  $\text{CD4}^+$   $\text{IFN}\gamma^+$  T  
845 cells indicated by the distance of one  $\text{IFN}\gamma$  producing  $\text{CD4}^+$  T cell to its nearest neighbor. **f)**  
846 Distances of M25  $\text{CD4}^+$  T cells to the nearest MCMV infected cell. **g)** Distances of  $\text{IFN}\gamma$  producing  
847  $\text{CD4}^+$  T cells to the nearest MCMV infected cell. **h)** Dynamics of the  $\text{IFN}\gamma$  concentration within the  
848 simulated tissue section of  $800 \times 800 \mu\text{m}^2$  over the progression of infection. For each scenario, i.e.,  
849 w./o. and with APC, one representative simulation out of ten replicates is shown. All simulations  
850 were run over 60 days in total. Results in panel (**c-g**) are based on ten replicates for each scenario,  
851 with the mean and standard deviation (error bars) indicated. Please note that simulations are  
852 generally run with higher infection dynamics than observed experimentally for computational  
853 efficiency to account for the small simulated grid size (see Materials & Methods). Therefore, viral  
854 loads can only be qualitatively compared to experimental data.

855

856

857

858

859

860

861

862

863

864

865

866

867

868

869

## 870 Discussion

871

872 Infection of mice with MCMV induces an acute infection with lytic viral replication, followed by  
873 persistence of latent viral genomes from which sporadic reactivation events can occur. While acute  
874 infection is controlled in most organs within one to two weeks, the SGs represent a unique mucosal  
875 niche with sustained viral replication and hence persistence over several weeks<sup>32</sup>. Despite the  
876 marked infiltration of functional T cells, latency in this peripheral glandular tissue is only achieved  
877 two months post viral trigger. One key contribution to this delayed immune control is CMV's  
878 interference with antigen presentation that prevents the recognition of infected cells by CD8<sup>+</sup> T  
879 cells, and in less documented circumstances by CD4<sup>+</sup> T cells too<sup>33–39</sup>. Since the decreased  
880 expression or the complete lack of MHC class I on affected cells would induce a “missing self”  
881 signal and hence render virally infected cells susceptible to NK cell-mediated killing, CMV encodes  
882 for a MHC class I homolog, serving as surrogate MHC class I molecule preventing NK cell attack<sup>40</sup>.  
883 Moreover, MCMV mutants lacking the m157 gene and having a functional version of MCK2 gene  
884 product, reveal enhanced dissemination and virulence properties<sup>41–47</sup>. Therefore, the acquisition  
885 of beneficial virus-specific *in vivo* characteristics that allow MCMV to persist preferentially in the  
886 SGs are responsible for the negligible role of NK and CD8<sup>+</sup> T cells to control MCMV infection in  
887 the SGs, and further highlight a superior contribution of CD4<sup>+</sup> T cells in viral control<sup>7,8</sup>.

888 In the present study, we investigated the crucial antiviral effector functions by CD4<sup>+</sup> T cells upon  
889 CMV infection in murine salivary glands. Although previous studies have already identified an  
890 indispensable role of IFN $\gamma$  producing CD4<sup>+</sup> T cells in controlling MCMV infection in the SGs,  
891 relevant spatiotemporal information was missing that might help to explain the overall slow  
892 process of CD4<sup>+</sup> T cell-mediated viral control<sup>12,13</sup>.

893 Here, we combined experimental data together with mathematical models to provide a  
894 mechanistic understanding of the dynamics of viral spread and immune protection on a cellular  
895 level. By generating detailed micro-anatomical information about the tissue localization of infected  
896 cells, CD4<sup>+</sup> T cells, sites of antigen recognition and IFN $\gamma$  production, and inclusion of these data  
897 into mathematical models, we propose a scenario that explains the delayed control of MCMV  
898 infection in the SGs.

899 We found that M25-specific CD4<sup>+</sup> T cells successfully infiltrated MCMV infected SGs early upon  
900 infection, displayed an activated phenotype, and produced considerable amounts of the key pro-  
901 inflammatory cytokine IFN $\gamma$  upon encountering the cognate M25 antigen. However, with gradually  
902 increasing viral loads in the SGs, decreasing numbers of M25 CD4<sup>+</sup> T cells, together with reduced  
903 TCR signaling events over time, suggested a negligible contribution to early MCMV control.  
904 Possible reasons might be the temporal shift from early dominant M25-specific CD4<sup>+</sup> T cells to

905 M09-specific CD4<sup>+</sup> T cells at later time points<sup>17</sup>, and possibly a role for CD4<sup>+</sup> T cells with other  
906 MCMV-specificities, given the large MCMV genome containing more than 200 open reading  
907 frames with antigenic potential<sup>32,48</sup>. However, we have previously shown that the adoptive transfer  
908 of *in vivo* activated M25 CD4<sup>+</sup> T cells into sublethally irradiated mice conferred immune protection  
909 in various organs in an IFN $\gamma$ -dependent manner, indicating that M25-specific cells are able to  
910 contribute to MCMV control in immunocompromised mice<sup>19</sup>. Focusing on the abundant  
911 endogenous CD4<sup>+</sup> T cell population within the MCMV infected SGs, we demonstrated that CD4<sup>+</sup>  
912 T cells are the primary cellular source of IFN $\gamma$  production, in accordance to elevated TCR  
913 downstream signaling, indicative of antigen recognition. Moreover, *in situ* analysis of MCMV  
914 infected SMGs revealed that IFN $\gamma$  expressing CD4<sup>+</sup> T cells were mostly found in vicinity to sites of  
915 lytic viral replication, in dense clusters surrounding CD11c<sup>+</sup> cells that contained small inclusions  
916 of cellular cargo from previously infected cells. Clearly, these CD11c<sup>+</sup> cells were not actively  
917 infected with MCMV, as this would have resulted in presence of the reporter fluorochrome within  
918 the entire cytoplasm and not within confined small areas as observed. We thus speculate that this  
919 cargo represents apoptotic cell bodies from previously infected cells<sup>11</sup>. In this regard, Stahl et al.  
920 made a similar observation in infected neonatal lungs, where infection with MCMV attracted  
921 myeloid cells, leading to the generation of morphologically unique “nodular inflammatory foci (NIF)”  
922 (multiple juxta-positioned MCMV infected cells and associated immune cell infiltrates). Within NIF,  
923 which were required for efficient containment of the infection, they characterized few small  
924 mcherry-containing apoptotic bodies within myeloid cells, revealing the possible uptake of cell  
925 debris derived from previously infected cells by these cells<sup>49</sup>. As we observed discrete  
926 accumulations of CD4<sup>+</sup> T cells around CD11c<sup>+</sup> APCs, with some of them revealing cargo of MCMV  
927 infected cells, in combination with local TCR triggering and IFN $\gamma$  production, we were wondering  
928 which signals are required for the recruitment of these cells into regions of antigen presentation.  
929 We specifically investigated the role of the CXC chemokines CXCL9 (MIG) and CXCL10 (IP-10)  
930 in this process. These two chemokine ligands share the common receptor CXCR3, which is  
931 predominantly expressed on effector T cells<sup>22,23</sup>. Whereas IFN $\gamma$  signaling strongly induces CXCL9  
932 expression, CXCL10 can also be upregulated by type I interferons (IFN $\alpha/\beta$ )<sup>50,51</sup>. CXCR3 is  
933 important for directional migration of CD4<sup>+</sup> and CD8<sup>+</sup> T cells in various infectious settings<sup>52-54</sup>.  
934 However, a clear role of CXCR3 expression in MCMV-specific T cells has so far not been  
935 demonstrated. Although this chemokine receptor promoted the recruitment of antigen-specific  
936 CD8<sup>+</sup> T cells to MCMV infected liver<sup>55</sup>, the lack of CXCR3 expression on CD8<sup>+</sup> T cells did not  
937 interfere with their ability to infiltrate into the SGs upon MCMV infection<sup>31</sup>. In our study, we  
938 confirmed that CXCR3 expression on CD4<sup>+</sup> T cells is dispensable for SG infiltration, however, it



939 played a decisive role for the spatial localization within MCMV infected SGs. We show that  
940 CXCR3-competent CD4<sup>+</sup> T cells are specifically recruited to sites of CXCL9 and CXCL10  
941 expression, leading to the formation of distinct CD4<sup>+</sup> T cell clusters surrounding APCs. In contrast,  
942 despite similar infiltration capacity and phenotypic characteristics of CXCR3-deficient CD4<sup>+</sup> T  
943 cells, these cells rather distributed randomly. Since we identified TCR engagement and IFN $\gamma$   
944 production mainly within these dense aggregations of T cells, this observation suggests that  
945 CXCR3-deficient CD4<sup>+</sup> T cells might have reduced chances for antigen encounter and hence  
946 ability to produce IFN $\gamma$ . Interestingly, surface expression of CXCR3 was almost completely absent  
947 on SG-residing CD4<sup>+</sup> T cells, most likely due to ligand engagement and receptor internalization,  
948 as shown in a recent publication<sup>56</sup>.

949 Finally, by feeding our experimental data into mathematical models, we developed a simulation  
950 scenario of the CD4<sup>+</sup> T cell-mediated MCMV control in the SGs. In doing so, we could show that  
951 a local rather than long-range protection capability of IFN $\gamma$  producing CD4<sup>+</sup> T cells leads to  
952 eventual infection control in the SGs. Individual small areas, defined by IFN $\gamma$ -producing  
953 and sensing cells, provide site-specific antiviral protection, and allow MCMV to spread and  
954 replicate at spots that have not yet been yet exposed to IFN $\gamma$ . Furthermore, due to the indirect  
955 antigen recognition on CD11c<sup>+</sup> APCs that have engulfed cargo of previously infected cells, effector  
956 CD4<sup>+</sup> T cell responses occur in a delayed manner, i.e. only after a virus-infected cell has already  
957 ceased to produce new virions. This indirect antigen recognition enables ongoing viral replication  
958 over several weeks in the SGs. However, the accumulation of effector CD4<sup>+</sup> T cell responses by  
959 APCs potentiates the IFN $\gamma$  concentration within local regions, leading to larger areas of IFN $\gamma$ -  
960 mediated protection and faster viral control in comparison to scenarios without APC mediated  
961 clustering of CD4<sup>+</sup> T cells. Ultimate control of the lytic infection and the transition into a latent state  
962 would hence only happen after continued accumulation of locally protected areas, finally resulting  
963 in an organ-wide protection. Pursuing the idea of a short-range diffusion property of IFN $\gamma$ , Müller  
964 et al. revealed a few years ago a confined action radius of IFN $\gamma$  that induced potent protection  
965 mechanisms beyond the immunological synapse, in (bystander) cells located more than 80  $\mu$ m  
966 away from the T cell-APC interaction<sup>57</sup>. These would imply that within the vicinity of IFN $\gamma$  producing  
967 CD4<sup>+</sup> T cells, depending on the number of IFN $\gamma$  producing CD4<sup>+</sup> T cells and the amount of per-  
968 cell produced IFN $\gamma$ , surrounding cells being maximally eight cell layers away from the IFN $\gamma$  source  
969 should be able to sense the secreted IFN $\gamma$  and thus being protected from MCMV infection.

970 In this context, our mathematical model provides first mechanistic insights into the dynamics of  
971 MCMV infection and clearance in the SGs by combining different types of experimental data and  
972 measurements. Although the model only captures a small fraction of the SMG, and therefore

973 considers a higher infection level than observed experimentally, it provides a qualitative  
974 representation of the observed infection dynamics, as well as quantitative analysis of the  
975 spatiotemporal relationships of individual cells. With the results shown above relying on  
976 parameterizations that favor local viral spread<sup>58</sup>, eventual viral control is also achieved by locally  
977 mediated IFN $\gamma$  protection if MCMV would spread more heterogeneously within the tissue given  
978 higher viral diffusion, but would require larger local IFN $\gamma$  perimeters. In general, the ability and  
979 rapidness of viral control depends on the extension and duration of local IFN $\gamma$  concentrations,  
980 which is considerably enhanced by APC-mediated clustering of CD4<sup>+</sup> T cells. More detailed and  
981 time-resolved measurements, as e.g. on the stability and longevity of APC-formed CD4<sup>+</sup> T cell  
982 clusters, or on the dynamics of IFN $\gamma$  secretion by individual CD4<sup>+</sup> T cells, will help to improve the  
983 parameterization of the model and validate previous parameter choices.

984

985

986

987

988

989

990

991

992

993

994

995

996

997

998

999

## 1000 **Materials & Methods**

### 1001 **Ethics Statement**

1002 This study was conducted in accordance to the guidelines of the animal experimentation law (SR  
1003 455.163; TVV) of the Swiss Federal Government. The protocols were approved by the Cantonal  
1004 Veterinary Office of the canton Zürich, Switzerland (animal experimental permissions: 146/2014  
1005 and 114/2017).

### 1006 **Mice**

1007 Eight to twelve-weeks old age -and sex-matched mice were used for each experiment described  
1008 in this study. C57BL/6J mice were purchased from Janvier Elevage and referred to as WT B6  
1009 mice. C57BL/6N-Tg(TCRaM25,TCRbM25)424 Biat (M25-III) (M25xLy5.1) mice harbor TCR tg  
1010 CD4<sup>+</sup> T cells specific for the M25<sub>411-425</sub> peptide on the CD45.1 congenic background. The congenic  
1011 CD45.1 WT B6 mice were bred in house. Nur77GFP (JAX stock # 016617), DssRed.T3 (JAX  
1012 stock # 006051), Great (JAX stock # 017580), IFN $\gamma$ <sup>-/-</sup> (JAX stock # 002287) and TCR $\beta$ <sup>-/-</sup> (JAX stock  
1013 # 002118) mice were obtained from the Jackson Laboratory. CXCR3<sup>-/-</sup> (JAX stock # 005796) mice  
1014 were obtained from the Swiss immunological mouse repository (SwimmR). M25xNur77GFP and  
1015 M25xRFP CD4<sup>+</sup> T cells were generated by crossing the M25xLy5.1 mice to the Nur77GFP -and  
1016 DssRed.T3 mice, respectively. Rex3 mice were kindly provided by Prof. Matteo Iannacone  
1017 (IRCCS San Raffaele Scientific Institute, Milan, Italy) in agreement with Prof. Andrew D. Luster  
1018 (Massachusetts General Hospital, Massachusetts, USA), and crossed to TCR $\beta$ <sup>-/-</sup> mice for the  
1019 development of the Rex3 x TCR $\beta$ <sup>-/-</sup> mice. CD11cYFP-Prox1mOrange2 mice were kindly provided  
1020 by Prof. Cornelia Halin Winter (Swiss Federal Institute of Technology Zurich, Zurich, Switzerland).  
1021 All mice were bred and housed under specific pathogen-free conditions in animal facilities at the  
1022 Swiss Federal Institute of Technology in Zurich, Hönggerberg. Mice were exposed to a 12:12 h  
1023 light-dark cycle with unrestricted access to water and food.

### 1024 **Viruses and infections**

1025 All recombinant MCMVs were deficient in m157 protein expression ( $\Delta$ m157) and had a functional  
1026 version of the MCK2 gene product (MCK2<sup>+</sup>). MCMV-GFP expresses green fluorescent protein  
1027 (GFP) under the m157 promoter and MCMV-3DR expresses the red fluorescent protein mcherry  
1028 under the major immediate-early promoter<sup>59-61</sup>. MCMV-3DR was obtained from Prof. Martin  
1029 Messerle (Hannover Medical School, Hannover, Germany) in agreement with Prof. Reinhold

1030 Förster and Dr. Stephan Halle (Hannover Medical School, Hannover, Germany). The non-  
1031 fluorescence encoding MCMV strain was kindly provided by Prof. Luka Cicin-Sain (Helmholtz  
1032 Centre for Infection Research, Braunschweig, Germany) in agreement with Prof. Stipan Jonjić  
1033 (University of Rijeka, Rijeka, Croatia) and referred to as MCMV<sup>62</sup>. MCMV strains were propagated  
1034 on M2-10B4 cells and subsequently purified by ultracentrifugation on a 15% sucrose cushion as  
1035 previously described<sup>3</sup>. Viral titers were determined by standard plaque assay on M2-104 cells with  
1036 centrifugal enhancement. Mice were infected with  $2 \times 10^5$  or  $5 \times 10^5$  plaque forming units (Pfu) of  
1037 the respective MCMV mutant by i.v. tail injection.

### 1038 **Adoptive transfers**

1039 CD4<sup>+</sup> T cells from naïve M25xLy5.1, M25xNur77GFP, M25xRFP, IFN $\gamma$ <sup>-/-</sup>, CXCR3<sup>-/-</sup> or CD45.1 WT  
1040 B6 mice, and CD8<sup>+</sup> T cells from naïve CD45.1 or CD45.2 WT B6 mice, were purified from spleens  
1041 by positive selection using anti-CD4 or anti-CD8 $\alpha$  magnetic activated cell sorting (MACS) beads  
1042 (Miltenyi Biotech, Bergisch Gladbach, Germany) according to the manufacturer's instructions. Cell  
1043 viability was assessed by trypan blue exclusion and confirmed to be greater than 90%. Flow  
1044 cytometric cell analyses indicated >95% purity of the isolation procedures.  $9 \times 10^5$  or  $10^6$  M25 CD4<sup>+</sup>  
1045 T cells were adoptively transferred into naïve recipient WT B6 mice one day prior MCMV or  
1046 MCMV-GFP infection.  $3 \times 10^6$  or  $3.5 \times 10^6$  CD4<sup>+</sup>, and  $10^6$  CD8<sup>+</sup> T cells were adoptively transferred  
1047 into naïve recipient Rex3 x TCR $\beta$ <sup>-/-</sup> or TCR $\beta$ <sup>-/-</sup> mice seven days prior MCMV or MCMV-GFP  
1048 infection. Cell transfers were executed by i.v. tail injection.

### 1049 ***In vivo* peptide stimulations & intravascular antibody labeling**

1050  $10^6$  MACS isolated M25 CD4<sup>+</sup> or M25xNur77GFP CD4<sup>+</sup> T cells were adoptively transferred one  
1051 day prior MCMV infection into naïve recipient WT B6 mice. M25 peptide (amino acid sequence:  
1052 NHLYETPISATAMVI) was purchased from EMC microcollections (Tübingen, Germany) and 20  
1053  $\mu$ g of the M25 peptide in 0.5% DMSO in 1x PBS solution were injected i.v. at day 8 or 21 post  
1054 MCMV infection. Three hours post M25 peptide challenge, SGs and spleens were harvested in  
1055 complete cell culture medium (RPMI1640 supplemented with 10% FCS, 2mM L-Glutamine, 1x  
1056 penicillin/streptomycin) with additional 10  $\mu$ g/ml Brefeldin A. Following digestion or meshing of  
1057 organs was performed in further presence of 5  $\mu$ g/ml Brefeldin A.  
1058 Intravascular labeling was performed by i.v. administration of 3  $\mu$ g of fluorophore-conjugated anti-  
1059 CD45.1 antibody 3 min prior euthanasia with CO<sub>2</sub> as described previously<sup>63</sup>. Organs were  
1060 subsequently perfused with 10 ml of 1x PBS and harvested for subsequent lymphocyte isolation  
1061 and flow cytometric analysis.

## 1062 **Lymphocyte isolation and Flow cytometry**

1063 Mice were euthanized by CO<sub>2</sub> inhalation, and the SGs and lungs were subsequently perfused via  
1064 the right heart ventricle with 10 ml ice-cold 1x PBS to remove circulating blood. Single-cell  
1065 suspensions of spleens and lungs were prepared as previously described with slight  
1066 modifications<sup>64</sup>. Briefly, spleens were passed through metal grids using syringe plungers. The SGs  
1067 and lungs were cut into small pieces and digested in complete cell culture medium containing 2.4  
1068 mg/ml collagenase type I and 0.2 mg/ml DNaseI for 2 x 20 min at 37°C on a thermomixer.  
1069 Additionally, they were flushed through 18G and 21G needles in between and after the second  
1070 round of digestion, respectively, and subjected to centrifugation over a 30% Percoll gradient.  
1071 Prior to fluorophore-conjugated antibody labeling, cells were treated with a hypotonic ammonium-  
1072 chloride-potassium lysis buffer for 5 - 10 min at room temperature (RT) to remove remaining  
1073 erythrocytes. Cells were washed and cell surface staining was executed for 20 min at RT in the  
1074 dark. In case of continuing intracellular cytokine staining, cells were fixed and permeabilized in 2  
1075 × FACS BD Lysis Solution (BD Biosciences) with 0.08% Tween20 in ddH<sub>2</sub>O for 10 min at RT in  
1076 the dark. Subsequent intracellular staining for IFN $\gamma$  and TNF $\alpha$  was performed for 35 min at RT in  
1077 the dark. Dead cells were excluded by applying a LIVE/DEAD fixable Near-IR staining  
1078 (ThermoFisher Scientific). All staining and washing steps were performed in FACS buffer (2%  
1079 FCS and 5mM EDTA in 1x PBS). Fluorescently labeled antibodies were purchased from Biolegend  
1080 (Lucerna Chem AG) or BD Biosciences, and are summarized in **Table 1**. Multi-parametric flow  
1081 cytometric analysis was performed using LSRII flow cytometer (BD Biosciences, Allschwil,  
1082 Switzerland) with FACSDiva software. Data were analyzed using FlowJo software (Version 10.4.2,  
1083 Tree Star).

1084

## 1085 **Plaque forming assay**

1086 Viral loads in organs were determined on M2-104 cells as described previously<sup>65</sup>. Briefly, 50'000  
1087 M2-10B4 were added to each well of a 24-well plate one day prior organ-derived virus exposure.  
1088 Freshly harvested or in -80°C stored organ in 1 ml complete cell culture medium was homogenized  
1089 using a metal bead at 25 Hz for 1 - 1.5 min by TissueLyser (Qiagen, Hilden, Germany). After  
1090 centrifugation at 3500g for 5 min, virus containing supernatant was taken and transferred to a new  
1091 Eppendorf tube. A 10x serial dilution of the supernatant in complete cell culture medium was  
1092 performed using round-bottom 96-well plates. Medium of the previous day cultivated M2-10B4  
1093 cells was aspirated and replaced by the diluted supernatant. The 24-well plates were centrifuged  
1094 for 30 min at 535g and subsequently incubated for 1h at 37°C. Medium was aspirated and

1095 replaced by 2.2 % Methylcellulose (4000 centipoise) in ddH<sub>2</sub>O supplemented with 1x MEM, 10%  
1096 FCS, 2mM L-Glutamine, 1% penicillin-streptomycin and 10mM HEPES/sodium bicarbonate  
1097 solution. Plates were incubated for four days at 37°C. After four days of incubation, 500 µl of 25%  
1098 Formaldehyde solution in ddH<sub>2</sub>O was added on top of the methylcellulose layer and plates were  
1099 left for 3h at RT. Next, plates were inverted to remove viscous medium and carefully washed three  
1100 to four times with 1x PBS. Crystal violet solution was added to the wells and plates were incubated  
1101 for 20 min at RT. Finally, plates were washed with ddH<sub>2</sub>O, air-dried, and plaques were counted  
1102 using an inverted microscope. With the exception of the 1h incubation period at 37°C, all steps  
1103 were carried out at 4°C. Detection limit was set to 100 Pfu.

## 1104 **2D Immunohistochemistry - Tissue preparation & Staining**

1105 1x PBS-perfused SGs were fixed in methanol-free 4% formaldehyde solution for 4 - 6 h at 4°C.  
1106 After a short wash in 1x PBS, organs were cryoprotected in 30% sucrose in 1x PBS overnight  
1107 (o/n) at 4°C, followed by an embedding in optimal cutting temperature (O.C.T) compound and a  
1108 snap-freezing in liquid nitrogen. The SG samples were stored at -80°C until further usage. Frozen  
1109 tissue sections of 10 µm thickness were generated by a cryostat-microtome, 2 - 3 hours air-dried,  
1110 and stored at -20°C if not directly used. Completely air-dried thin tissue sections of the SGs were  
1111 washed with 1x PBS to remove remaining O.C.T compound and marked with an hydrophobic  
1112 barrier PAP pen (H-4000, Vector Laboratories). Tissue sections were blocked in 1x PBS  
1113 containing 10% normal goat serum (NGS), 1% Bovine serum albumin (BSA) and 0.1% TritonX-  
1114 100, for 1h at RT. Subsequent staining steps with unlabeled and/or fluorochrome-conjugated  
1115 antibodies were executed for 1h at RT or o/n at 4°C in the dark. Slides were washed in between  
1116 three times for 7 min in 1x PBS. Finally, sections were washed again in 1x PBS and carefully  
1117 rinsed with ddH<sub>2</sub>O, before counterstained with 4',6'-diamidino-2-phenylindole (DAPI) for 5 min at  
1118 RT and mounted in home-made Mowiol-DABCO solution (see CSH protocols; RI: 1.45 - 1.52).  
1119 Slides were stored at RT for one to two days in the dark before microscopic investigation.  
1120 Immunolabeling was performed in 1x PBS containing 3% BSA and 0.1% TritonX-100 in a humidity  
1121 chamber. Antibodies were purchased from Biolegend (Lucerna Chem AG), Life Technologies  
1122 (Thermo Fisher Scientific), BD Biosciences, Clontech Laboratories and Rockland  
1123 Immunochemicals, and are summarized in **Table 2**.

## 1124 **2D Immunohistochemistry - Imaging & Analysis**

1125 Images of thin tissue slices were acquired with an inverted confocal microscope (Axiovert 200m  
1126 microscope, Carl Zeiss, Inc., Zurich, Switzerland), equipped with an CSU-X1 spinning-disk

1127 confocal unit (Yokogawa), a 20x (Numerical aperture (NA): 0.5, Immersion: Air) or a 10x (NA:  
1128 0.3, Immersion: Air) magnification phase contrast objective, a solid state laser unit with 4 laser  
1129 lines (405, 488, 561, 647, Toptica) and two Evolve 512 EMCCD cameras (Photometrics).  
1130 Detection and spectral separation of excited fluorophores were achieved through the usage of  
1131 specific emission bandpass filters (450/50, 525/50, 605/52 and 700/75). Images with sequential  
1132 fluorophore excitation and with z-stacks sizes of 1  $\mu\text{m}$  were recorded and analyzed using  
1133 imageJ/Fiji software (Version 1.51). An initial brightness/contrast enhancement was performed  
1134 with subsequent quantitative analysis of IFN $\gamma$  producing (EYFP $^+$ ) cells using the cell counter  
1135 plugin.

### 1136 **Whole slide Imaging & Analysis**

1137 10  $\mu\text{m}$  thin frozen tissue sections of MCMV infected SGs were prepared and stained according to  
1138 the 2D immunohistochemistry part. However, only SG sections, which do not show any signs of  
1139 processing-mediated artifacts (e.g. tissue distortions, air bubbles or folds), were subjected to  
1140 whole slide scanning using Slide Scanner Panoramic 250 Flash III (3D Histech, Budapest,  
1141 Hungary) to realize faithful data for further downstream analysis. Images with a z-stack size of 0.6  
1142  $\mu\text{m}$  were acquired using a 20x magnification objective (NA: 0.8, Immersion: Air). Recorded mrxs  
1143 files were directly imported into the HALO $^{\text{®}}$  software (<https://indicalab.com/halo/>; Version  
1144 3.0.311.373; Indica Labs, Albuquerque, New Mexico, USA) for quantitative image analysis. In  
1145 doing so, we first applied tissue annotation to delimit our spatial analysis to the SMG. We then  
1146 performed a categorization of diverse tissue types (i.e. endogenous CD4 $^+$  and M25 CD4 $^+$  T cells,  
1147 sites of viral replication, duct cells, other cells and background) using tissue classifier (Random  
1148 Forest). We next exerted Highlex FL module (Version 3.1.0.0) for the simultaneous detection of  
1149 various cell types based on fluorescence marker intensities in the different cellular compartments  
1150 (i.e. nucleus, cytoplasm and cell membrane). In this regard, we first identified and segmented all  
1151 DAPI $^+$  cells, irrespective of cell type (Nuclear contrast threshold = 0.5, Minimum Nuclear Intensity  
1152 = 0.1, Nuclear Segmentation Aggressiveness = 0.8 and Minimum Nuclear Roundness = 0).  
1153 Afterwards, endogenous CD4 $^+$  and M25 CD4 $^+$  T cells were defined within DAPI $^+$  cells based on  
1154 fluorescence signal intensities in the previously mentioned cellular compartments (see table  
1155 below). In this regard, endogenous CD4 $^+$  T cells expressed only cell membrane marker CD4 (=   
1156 DAPI $^+$ CD4 $^+$  cells) whereas M25 CD4 $^+$  T cells were additionally positive for the cytoplasmic RFP  
1157 signal (= DAPI $^+$ CD4 $^+$ RFP $^+$  cells). Finally, quantitative spatial tissue analysis was executed using  
1158 nearest neighbor analysis in conjunction with proximity analysis to determine the relative spatial

1159 distribution of cells and sites of viral replication across the tissue section. Micro-anatomical  
1160 localization of sites of viral replication was provided by the tissue classifier.

1161 Thresholding (signal intensities):

| Fluorescent label<br>(marker) | Nucleus | Cytoplasm | Cell membrane |
|-------------------------------|---------|-----------|---------------|
| DAPI                          | 1       | -1        | -1            |
| AF568 (RFP)                   | 40      | 40        | 0             |
| AF647 (CD4)                   | 35      | 35        | 0             |

1162 Signal range: 0 (= no signal) - 255 (= highest intensity)

1163

### 1164 **3D Immunohistochemistry - Tissue preparation & Staining**

1165

1166 1x PBS perfused SGs were fixed in methanol-free 4% formaldehyde solution for 4 - 6 h at 4°C.  
1167 After a short wash in 1x PBS, organs were embedded in low-melting 4% agarose in 1x PBS, and  
1168 subsequently cut in 200 µm thick tissue sections using a Compresstome® (Precisionary,  
1169 Greenville, USA). Slices were collected in 6-well plates pre-filled with 0.1% PBST and incubated  
1170 for 24 h at RT. PBST was aspirated and sections were incubated overnight in blocking buffer (1x  
1171 PBS containing 10% NGS, 1% BSA and 0.1% TritonX-100) at 4°C. Blocking buffer was removed  
1172 and sections were stained in 6, 12 or 24-well plates with primary fluorochrome-conjugated  
1173 antibodies diluted in 3% BSA in 1x PBS for three to four days at 4°C or RT (**Table 2**). Next, slices  
1174 were washed three to four times with 1x PBS during a 24 h period at 4°C. 1x PBS was removed,  
1175 and a home-made RIMS with RI = 1.47 (45 g Histodenz in 30 ml 1x PBS) was added to the  
1176 sections. The samples were incubated in the dark on a rotator for 6 h at RT. Finally, SG sections  
1177 were mounted using fresh RIMS and appropriate 200 µm thick iSpacer® (SunJin Lab, Hsinchu,  
1178 Taiwan). Tissue samples were stored one to two days at RT in the dark prior confocal imaging.

1179

### 1180 **3D Immunohistochemistry - Imaging & Analysis**

1181

1182 Images of 200 µm thick tissue sections were acquired with an inverted confocal microscope (Leica  
1183 TCS SP8 MP), using a 25x magnification objective (NA: 0.95, Immersion: Water), a laser unit with  
1184 AOBs system (405, 488 (Argon Laser), 561, 633), and internal detection with 1 PMT detector and  
1185 2 Leica Hybrid detectors, operated by the Leica LAS X 3.5.5. Images were acquired with  
1186 sequential fluorophore excitation, z-stacks sizes of 2 µm and a scan format of 512x512 pixels.



1187 Image analysis was performed using imageJ/Fiji software (Version 1.51), Imaris 9.5 (Bitplane,  
1188 Zurich, Switzerland) and RStudio (Version 1.1.463). Using Imaris, several processing steps were  
1189 applied to the images (**Table 3**). The acquired signals were attributed to each individual cell  
1190 (surface creation), or its location was determined without accurate segmentation of cell bodies by  
1191 the generation of spherical objects centered on any pixels with signal above a user set threshold  
1192 (spots creation) (**suppl. Fig 4c**). For the CD4 channel, gamma was adjusted to 1.35, and  
1193 Gaussian smoothing was used with a width of 0.32  $\mu\text{m}$ . Finally, surfaces and spots were created  
1194 according to the parameters in **Table 4**. Appeared extra-cellular and likely represented imaging  
1195 artefacts were not selectively removed from analysis to avoid introducing user bias.

1196

### 1197 ***Ex vivo* live imaging**

1198

1199 Mice were euthanized by CO<sub>2</sub> inhalation, and the SGs were harvested in complete cell culture  
1200 medium (RPMI1640 supplemented with 10% FCS, 2mM L-Glutamine, 1x penicillin/streptomycin).  
1201 The organs were embedded in 4% agarose in 1x PBS, and subsequently cut in 200  $\mu\text{m}$  thick  
1202 tissue sections using a Compresstome<sup>®</sup> (Precisionary, Greenville, USA). Slices were collected in  
1203 6-well plates filled with live imaging medium (RPMI 1640 without phenol red supplemented with  
1204 10% FCS, 2mM L-Glutamine, 1x penicillin/streptomycin, 1M HEPES, 50 mM  $\beta$ -Mercaptoethanol,  
1205 100x Sodium Pyruvate, 100x Minimum Essential Medium Non-Essential Amino Acids). Next,  
1206 slices were mounted using live imaging medium and 200  $\mu\text{m}$  thick iSpacer<sup>®</sup> (SunJin Lab, Hsinchu,  
1207 Taiwan). Finally, images were acquired using the 40x magnification objective (NA: 1.1, Immersion:  
1208 Water) from the Leica TCS SP8 MP system described above. Time lapses of 5-10 min were  
1209 acquired with a time interval of approximately 25 sec and a scan format of 512x512 pixels. A  
1210 brightness/contrast enhancement was performed using imageJ/Fiji.

1211

### 1212 **Mathematical model of viral-immune interactions in the SGs**

1213

1214 For a detailed description of the mathematical model and its parameterization to analyze the  
1215 infection and immune dynamics in the SG please refer to **Supp. Information – Mathematical**  
1216 **model**. In brief, a multi-scale cellular Potts model (CPM) for the SMG was developed using the  
1217 software Morpheus (<http://morpheus.gitlab.io>)<sup>66</sup>. The modeling framework allows us to follow the  
1218 dynamics and motility of individual cells while accounting for intra- and extracellular processes.  
1219 Recapitulation of the tissue structure was achieved by segmenting microscopy images of cross  
1220 sections of the SMG using Ilastik Version1.3.3.pos3 (<https://www.ilastik.org>)<sup>67</sup>. Duct structures  
1221 extracted as binary masks were considered as background and non-duct areas later populated by

1222 epithelial cells within Morpheus. The model considers the cellular turnover and infection of  
1223 immobile epithelial cells, intracellular viral replication within infected cells, as well as export and  
1224 diffusion of extracellular virus. Endogenous CD4<sup>+</sup> and M25 CD4<sup>+</sup> T cells are able to infiltrate the  
1225 tissue and release IFN $\gamma$  upon encounter of APC or infected cells dependent on the scenario,  
1226 thereby inhibiting viral replication within infected cells. All processes of cell proliferation, death,  
1227 infection and infiltration follow stochastic processes, which were parameterized according to  
1228 experimental data from the literature or current observations within this study. For processes  
1229 where reliable measurements are missing, parameter sweeps were performed with model results  
1230 challenged against the experimental data to evaluate reasonable parameterizations. Sensitivity of  
1231 results with regard to selected parameter combinations were performed. For computational  
1232 efficiency, only a small section of 800×800  $\mu\text{m}^2$  of the SMG tissue was simulated, with the actually  
1233 observed 2D-tissue cross sections being 31-34-fold larger (e.g. ~20-22 mm<sup>2</sup>). Therefore, our  
1234 simulations generally provide a semi-quantitative representation of the experimentally observed  
1235 dynamics. Due to the relatively small tissue area simulated, higher infection rates were considered  
1236 in order to still be able to characterize spatial relationships of infected and immune cells.  
1237 Otherwise, approximately only 1 in 10 simulations would contain one infected cell around day 8  
1238 post infection.

1239

## 1240 **Statistical analysis**

1241

1242 Statistical significance was determined by two-tailed unpaired t test, 2-way Anova with post hoc  
1243 Tukey's multiple comparisons test, or two-tailed Pearson correlation using GraphPad Prism  
1244 (Version 8.2, La Jolla, CA, USA) with \*P< 0.05, \*\*P< 0.01, \*\*\*P< 0.001 and \*\*\*\*P< 0.0001.

1245

## 1246 **Acknowledgment**

1247

1248 We thank Nathalie Oetiker and Franziska Wagen for excellent technical assistance and members  
1249 of the Oxenius, Joller and Sallusto groups for helpful discussions. We thank the Scientific Center  
1250 for Optical and Electron Microscopy (ScopeM) at ETH Zurich and the Center for Microscopy and  
1251 Image analysis (ZMB) at the University of Zurich for their professional support. We very appreciate  
1252 the important work of our animal facility care takers at ETH Höggerberg and the very obliging  
1253 service of Indica Labs providing us with the HALO<sup>®</sup> software. This work was supported by ETH  
1254 Zurich and the SNF (IZHRZ0\_180552 to AO). FG is supported by the Chica and Heinz Schaller  
1255 Foundation and member of the IWR. For high-performance computational analyses this work was

1256 supported by the state of Baden-Württemberg through bwHPC (MLS-WISO) and the German  
 1257 Research Foundation (DFG) through grant INST 35/1134-1 FUGG.

1258

1259 **Table 1: Flow cytometry antibody list (Surface & Intracellular staining)**

| Marker                | Fluorochrome | Manufacturer      | Clone    | Catalog # | RRID        | Conc      |
|-----------------------|--------------|-------------------|----------|-----------|-------------|-----------|
| B220                  | PE-Cy7       | Biolegend         | RA3-6B2  | 103222    | AB_313005   | 0.4 µg/ml |
| B220                  | BV510        | Biolegend         | RA3-6B2  | 103247    | AB_2561394  | 1 µg/ml   |
| B220                  | FITC         | Biolegend         | RA3-6B2  | 103206    | AB_312991   | 1 µg/ml   |
| B220                  | PE           | Biolegend         | RA3-6B2  | 103208    | AB_312993   | 0.4 µg/ml |
| B220                  | APC          | Biolegend         | RA3-6B2  | 103212    | AB_312997   | 0.4 µg/ml |
| CD11a/CD18<br>(LFA-1) | PE-Cy7       | Biolegend         | H155-78  | 141011    | AB_2564307  | 1 µg/ml   |
| CD11c                 | FITC         | Biolegend         | N418     | 117306    | AB_313775   | 2.5 µg/ml |
| CD279<br>(PD-1)       | PE-Cy7       | Biolegend         | 29F.1A12 | 135215    | AB_10696422 | 1 µg/ml   |
| CD3                   | PE-Cy7       | Biolegend         | 145-2C11 | 100320    | Ab_312685   | 1 µg/ml   |
| CD3                   | FITC         | Biolegend         | 145-2C11 | 100306    | AB_312671   | 1 µg/ml   |
| CD31                  | PE-Cy7       | Biolegend         | 390      | 102418    | AB_830757   | 0.3 µg/ml |
| CD326<br>(EpCAM)      | AF647        | Biolegend         | G8.8     | 118212    | AB_1134101  | 0.8 µg/ml |
| CD4                   | BV421        | Biolegend         | RM4-5    | 100544    | AB_11219790 | 1 µg/ml   |
| CD4                   | BV605        | Biolegend         | RM4-5    | 100548    | AB_2563054  | 1 µg/ml   |
| CD44                  | BV510        | Biolegend         | IM7      | 103044    | AB_2650923  | 1 µg/ml   |
| CD45.1                | PE           | Biolegend         | A20      | 110708    | AB_313497   | 0.4 µg/ml |
| CD45.1                | APC          | Biolegend         | A20      | 110714    | AB_313503   | 0.4 µg/ml |
| CD45.2                | FITC         | Biolegend         | 104      | 109806    | AB_313443   | 0.4 µg/ml |
| CD49d                 | FITC         | Biolegend         | R1-2     | 103606    | AB_313037   | 2.5 µg/ml |
| CD62L                 | PerCP        | Biolegend         | MEL-14   | 104430    | AB_2187124  | 1 µg/ml   |
| CD69                  | PE-Cy7       | Biolegend         | H1.2F3   | 104512    | AB_493564   | 1 µg/ml   |
| CD69                  | FITC         | BD<br>Biosciences | H1.2F3   | 55326     | .           | 2.5 µg/ml |
| CD8a                  | PerCP        | Biolegend         | 53-6.7   | 100732    | AB_893423   | 1 µg/ml   |

|                               |             |                  |                 |               |                  |                |
|-------------------------------|-------------|------------------|-----------------|---------------|------------------|----------------|
| CD8a                          | APC         | Biolegend        | 53-6.7          | 100712        | AB_312751        | 1 µg/ml        |
| CXCR3                         | BV421       | Biolegend        | CXCR3-173       | 126521        | AB_10900974      | 1 µg/ml        |
| F4/80                         | AF647       | Biolegend        | BM8             | 123122        | AB_893480        | 2.5 µg/ml      |
| I-A/I-E<br>(MHCII)            | PerCP       | Biolegend        | M5/114.15.2     | 107624        | AB_2191073       | 0.4 µg/ml      |
| NK1.1                         | PE          | Biolegend        | PK136           | 108708        | AB_313395        | 1 µg/ml        |
| NK1.1                         | PE-Cy7      | Biolegend        | PK136           | 108714        | AB_389364        | 1 µg/ml        |
| <b>IFN<math>\gamma</math></b> | <b>APC</b>  | <b>Biolegend</b> | <b>XMG1.2</b>   | <b>505810</b> | <b>AB_315404</b> | <b>1 µg/ml</b> |
| <b>TNF<math>\alpha</math></b> | <b>FITC</b> | <b>Biolegend</b> | <b>MP6-XT22</b> | <b>506304</b> | <b>AB_315425</b> | <b>5 µg/ml</b> |

1260

1261 **Table 2: Microscopy antibody list (primary & secondary)**

| Marker                        | Fluorochrome | Manufacturer                        | Catalog #      | Clone             | Concentration          |
|-------------------------------|--------------|-------------------------------------|----------------|-------------------|------------------------|
| CD4                           | AF647        | Biolegend                           | 100530         | RM4-5             | 5 µg/ml                |
| CD4                           | -            | BD Biosciences                      | 550280         | RM4-5             | 2.5 µg/ml              |
| CD8                           | BV421        | Biolegend                           | 100738         | 53-6.7            | 4 µg/ml                |
| E-Cadherin                    | AF647        | BD Biosciences                      | 560062         | 36/E-<br>Cadherin | n/a, 1/125<br>dilution |
| CD11b                         | -            | BD Biosciences                      | 557394         | M1/70             | 5 µg/ml                |
| GFP/ EYFP                     | -            | Clontech<br>Laboratories            | 632592         | n/a               | n/a, 1/200<br>dilution |
| RFP                           | -            | Rockland<br>Immunochemicals         | 600-401-379    | n/a               | n/a, 1/200<br>dilution |
| CD45.1                        | AF647        | Biolegend                           | A20            | 110720            | 5 µg/ml                |
| <b>Goat, anti-rat</b>         | <b>AF488</b> | <b>Thermo Fisher<br/>Scientific</b> | <b>A-11006</b> | <b>polyclonal</b> | <b>10 µg/ml</b>        |
| <b>Goat, anti-rat</b>         | <b>AF555</b> | <b>Thermo Fisher<br/>Scientific</b> | <b>A-21434</b> | <b>polyclonal</b> | <b>10 µg/ml</b>        |
| <b>Goat, anti-rat</b>         | <b>AF647</b> | <b>Thermo Fisher<br/>Scientific</b> | <b>A-21247</b> | <b>polyclonal</b> | <b>10 µg/ml</b>        |
| <b>Goat, anti-<br/>rabbit</b> | <b>AF488</b> | <b>Thermo Fisher<br/>Scientific</b> | <b>A-11034</b> | <b>polyclonal</b> | <b>10 µg/ml</b>        |
| <b>Goat, anti-<br/>rabbit</b> | <b>AF555</b> | <b>Thermo Fisher<br/>Scientific</b> | <b>A-21429</b> | <b>polyclonal</b> | <b>10 µg/ml</b>        |

1262

1263

1264 **Table 3:** General information to volumetric images

| <b>Dataset</b>                         | <b>Fig. 5b &amp; 5e</b> | <b>Fig. 5c</b> | <b>Suppl. Fig. 4c</b> |
|----------------------------------------|-------------------------|----------------|-----------------------|
| Description                            | FOV1 from SMG           | FOV2 from SMG  | FOV1 from SMG         |
| Total imaged volume (mm <sup>3</sup> ) | 0.0405                  | 0.0405         | 0.0405                |
| Number of channels                     | 2                       | 2              | 2                     |
| Number of CD4 <sup>+</sup> T cells     | 5534                    | 5442           | 5534                  |
| Number of MCMV associated sites        | 31                      | 55             | 31                    |

1265

1266

1267 **Table 4:** Technical information to volumetric images

| <b>Surface/ Spots creation parameters</b> |                |                                 |                                                    |                              |                                                  |                   |                        |                 |
|-------------------------------------------|----------------|---------------------------------|----------------------------------------------------|------------------------------|--------------------------------------------------|-------------------|------------------------|-----------------|
| Surface/ Spots name                       | Source Channel | Smoothing: Surface details (μm) | Background Subtraction: Diameter of largest sphere | Absolute intensity threshold | Split touching objects: Split seed diameter (μm) | Quality threshold | Voxel number threshold | Diamers (spots) |
| <b>Suppl. Fig. 7a</b>                     |                |                                 |                                                    |                              |                                                  |                   |                        |                 |
| MCMV surfaces                             | MCMV-3DR       | 0.3                             | 9.00                                               | 11.6                         | 7                                                | 3.29              | 19-1160                | -               |
| CD11c surfaces                            | CD11c eYFP     | 0.5                             | 10                                                 | 27.9                         | 10                                               | 6.03              | 1075-10060             | -               |
| CD4 spots                                 | CD4 AF647      | -                               | true                                               | -                            | -                                                | 2                 | -                      | 5.5             |

1268

1269

1270

1271

1272

1273

1274

1275

1276

1277

1278

1279 **References**

- 1280
- 1281 1. Emery, V. C. Investigation of CMV disease in immunocompromised patients. *J. Clin.*  
1282 *Pathol.* **54**, 84–88 (2001).
- 1283 2. Steininger, C. Clinical relevance of cytomegalovirus infection in patients with disorders of  
1284 the immune system. *Clin. Microbiol. Infect.* **13**, 953–963 (2007).
- 1285 3. Brune, W., Hengel, H. & Koszinowski, U. H. A mouse model for cytomegalovirus infection.  
1286 *Curr. Protoc. Immunol.* 19.7.1-19.7.13 (2001) doi:10.1002/0471142735.im1907s43.
- 1287 4. Hudson, J. B. The murine cytomegalovirus as a model for the study of viral pathogenesis  
1288 and persistent infections. *Arch. Virol.* **62**, 1–29 (1979).
- 1289 5. Campbell, A. E., Cavanaugh, V. J. & Slater, J. S. The salivary glands as a privileged site  
1290 of cytomegalovirus immune evasion and persistence. *Med. Microbiol. Immunol.* **197**, 205–  
1291 213 (2008).
- 1292 6. Reddehase, M. J., Mutter, W., Münch, K., Bühring, H. J. & Koszinowski, U. H. CD8-  
1293 positive T lymphocytes specific for murine cytomegalovirus immediate-early antigens  
1294 mediate protective immunity. *J. Virol.* **61**, 3102–3108 (1987).
- 1295 7. Jonjic, S., Mutter, W., Weiland, F., Reddehase, M. J. & Koszinowski, U. H. Site-restricted  
1296 persistent cytomegalovirus infection after selective long-term depletion of CD4+ T  
1297 lymphocytes. *J. Exp. Med.* **169**, 1199–1212 (1989).
- 1298 8. Jonjić, S., Pavić, I., Lucin, P., Rukavina, D. & Koszinowski, U. H. Efficacious control of  
1299 cytomegalovirus infection after long-term depletion of CD8+ T lymphocytes. *J. Virol.* **64**,  
1300 5457–5464 (1990).
- 1301 9. Doom, C. M. & Hill, A. B. MHC class I immune evasion in MCMV infection. *Med.*  
1302 *Microbiol. Immunol.* **197**, 191–204 (2008).
- 1303 10. Hengel, H. *et al.* Cytomegaloviral control of MHC class I function in the mouse. *Immunol.*  
1304 *Rev.* **168**, 167–176 (1999).
- 1305 11. Walton, S. M. *et al.* Absence of cross-presenting cells in the salivary gland and viral  
1306 immune evasion confine cytomegalovirus immune control to effector CD4 T cells. *PLoS*  
1307 *Pathog.* **7**, e1002214 (2011).
- 1308 12. Lucin, P., Pavić, I., Polić, B., Jonjić, S. & Koszinowski, U. H. Gamma interferon-dependent  
1309 clearance of cytomegalovirus infection in salivary glands. *J. Virol.* **66**, 1977–1984 (1992).
- 1310 13. Lucin, P. *et al.* Late phase inhibition of murine cytomegalovirus replication by synergistic  
1311 action of interferon-gamma and tumour necrosis factor. *J. Gen. Virol.* **75**, 101–110 (1994).
- 1312 14. Thom, J. T., Weber, T. C., Walton, S. M., Torti, N. & Oxenius, A. The Salivary Gland Acts  
1313 as a Sink for Tissue-Resident Memory CD8+ T Cells, Facilitating Protection from Local

- 1314 Cytomegalovirus Infection. *Cell Rep.* **13**, 1125–1136 (2015).
- 1315 15. Smith, C. J., Caldeira-Dantas, S., Turula, H. & Snyder, C. M. Murine CMV Infection  
1316 Induces the Continuous Production of Mucosal Resident T Cells. *Cell Rep.* **13**, 1137–  
1317 1148 (2015).
- 1318 16. Walton, S. M. *et al.* The Dynamics of Mouse Cytomegalovirus-Specific CD4 T Cell  
1319 Responses during Acute and Latent Infection. *J. Immunol.* **181**, 1128–1134 (2008).
- 1320 17. Arens, R. *et al.* Cutting Edge: Murine Cytomegalovirus Induces a Polyfunctional CD4 T  
1321 Cell Response. *J. Immunol.* **180**, 6472–6476 (2008).
- 1322 18. Mandaric, S. *et al.* IL-10 Suppression of NK/DC Crosstalk Leads to Poor Priming of  
1323 MCMV-Specific CD4 T Cells and Prolonged MCMV Persistence. *PLoS Pathog.* **8**,  
1324 e1002846 (2012).
- 1325 19. Jeitziner, S. M., Walton, S. M., Torti, N. & Oxenius, A. Adoptive transfer of  
1326 cytomegalovirus-specific effector CD4<sup>+</sup> T cells provides antiviral protection from murine  
1327 CMV infection. *Eur. J. Immunol.* **43**, 2886–2895 (2013).
- 1328 20. Verma, S. *et al.* Cytomegalovirus-Specific CD4 T Cells Are Cytolytic and Mediate Vaccine  
1329 Protection. *J. Virol.* **90**, 650–658 (2016).
- 1330 21. McDermott, D. S. & Varga, S. M. Quantifying Antigen-Specific CD4 T Cells during a Viral  
1331 Infection: CD4 T Cell Responses Are Larger Than We Think. *J. Immunol.* **187**, 5568–5576  
1332 (2011).
- 1333 22. Sallusto, F., Lenig, D., Mackay, C. R. & Lanzavecchia, A. Flexible programs of chemokine  
1334 receptor expression on human polarized T helper 1 and 2 lymphocytes. *J. Exp. Med.* **187**,  
1335 875–883 (1998).
- 1336 23. Bonecchi, R. *et al.* Differential expression of chemokine receptors and chemotactic  
1337 responsiveness of type 1 T helper cells (Th1s) and Th2s. *J. Exp. Med.* **187**, 129–134  
1338 (1998).
- 1339 24. Moran, A. E. *et al.* T cell receptor signal strength in Treg and iNKT cell development  
1340 demonstrated by a novel fluorescent reporter mouse. *J. Exp. Med.* **208**, 1279–1289  
1341 (2011).
- 1342 25. Ashouri, J. F. & Weiss, A. Endogenous Nur77 Is a Specific Indicator of Antigen Receptor  
1343 Signaling in Human T and B Cells. *J. Immunol.* **198**, 657–668 (2017).
- 1344 26. Ho, M. The history of cytomegalovirus and its diseases. *Med. Microbiol. Immunol.* **197**,  
1345 65–73 (2008).
- 1346 27. Reinhardt, R. L., Liang, H. E. & Locksley, R. M. Cytokine-secreting follicular T cells shape  
1347 the antibody repertoire. *Nat. Immunol.* **10**, 385–393 (2009).
- 1348 28. Richardson, D. S. & Lichtman, J. W. Clarifying Tissue Clearing. *Cell* **162**, 246–257 (2015).

- 1349 29. Yang, B. *et al.* Single-cell phenotyping within transparent intact tissue through whole-body  
1350 clearing. *Cell* **158**, 945–958 (2014).
- 1351 30. Groom, J. R. *et al.* CXCR3 Chemokine Receptor-Ligand Interactions in the Lymph Node  
1352 Optimize CD4+ T Helper 1 Cell Differentiation. *Immunity* **37**, 1091–1103 (2012).
- 1353 31. Caldeira-Dantas, S. *et al.* The Chemokine Receptor CXCR3 Promotes CD8 + T Cell  
1354 Accumulation in Uninfected Salivary Glands but Is Not Necessary after Murine  
1355 Cytomegalovirus Infection. *J. Immunol.* **200**, 1133–1145 (2018).
- 1356 32. Krmpotic, A., Bubic, I., Polic, B., Lucin, P. & Jonjic, S. Pathogenesis of murine  
1357 cytomegalovirus infection. *Microbes Infect.* **5**, 1263–1277 (2003).
- 1358 33. Del Val, M. *et al.* Cytomegalovirus prevents antigen presentation by blocking the transport  
1359 of peptide-loaded major histocompatibility complex class I molecules into the medial-golgi  
1360 compartment. *J. Exp. Med.* **176**, 729–738 (1992).
- 1361 34. Kleijnen, M. F. *et al.* A mouse cytomegalovirus glycoprotein, gp34, forms a complex with  
1362 folded class I MHC molecules in the ER which is not retained but is transported to the cell  
1363 surface. *EMBO J.* **16**, 685–694 (1997).
- 1364 35. Ziegler, H. *et al.* A mouse cytomegalovirus glycoprotein retains MHC class I complexes in  
1365 the ERGIC/cis-Golgi compartments. *Immunity* **6**, 57–66 (1997).
- 1366 36. Reusch, U. *et al.* A cytomegalovirus glycoprotein re-routes MHC class I complexes to  
1367 lysosomes for degradation. *EMBO J.* **18**, 1081–1091 (1999).
- 1368 37. Del Val, M., Münch, K., Reddehase, M. J. & Koszinowski, U. H. Presentation of CMV  
1369 immediate-early antigen to cytolytic T lymphocytes is selectively prevented by viral genes  
1370 expressed in the early phase. *Cell* **58**, 305–315 (1989).
- 1371 38. Hengel, H., Brune, W. & Koszinowski, U. H. Immune evasion by cytomegalovirus -  
1372 Survival strategies of a highly adapted opportunist. *Trends Microbiol.* **6**, 190–197 (1998).
- 1373 39. Yunis, J. *et al.* Murine cytomegalovirus degrades MHC class II to colonize the salivary  
1374 glands. *PLoS Pathog.* **14**, e1006905 (2018).
- 1375 40. Farrell, H. E. *et al.* Inhibition of natural killer cells by a cytomegalovirus MHC class I  
1376 homologue in vivo. *Nature* **386**, 510–514 (1997).
- 1377 41. Fleming, P. *et al.* The Murine Cytomegalovirus Chemokine Homolog, m131/129, Is a  
1378 Determinant of Viral Pathogenicity. *J. Virol.* **73**, 6800–6809 (1999).
- 1379 42. Saederup, N., Aguirre, S. A., Sparer, T. E., Bouley, D. M. & Mocarski, E. S. Murine  
1380 Cytomegalovirus CC Chemokine Homolog MCK-2 (m131-129) Is a Determinant of  
1381 Dissemination That Increases Inflammation at Initial Sites of Infection. *J. Virol.* **75**, 9966–  
1382 9976 (2001).
- 1383 43. Jordan, S. *et al.* Virus Progeny of Murine Cytomegalovirus Bacterial Artificial



- 1384 Chromosome pSM3fr Show Reduced Growth in Salivary Glands due to a Fixed Mutation  
1385 of MCK-2. *J. Virol.* **85**, 10346–10353 (2011).
- 1386 44. Arase, H., Mocarski, E. S., Campbell, A. E., Hill, A. B. & Lanier, L. L. Direct recognition of  
1387 cytomegalovirus by activating and inhibitory NK cell receptors. *Science (80-. ).* **296**, 1323–  
1388 1326 (2002).
- 1389 45. Smith, H. R. C. *et al.* Recognition of a virus-encoded ligand by a natural killer cell  
1390 activation receptor. *Proc. Natl. Acad. Sci. U. S. A.* **99**, 8826–8831 (2002).
- 1391 46. Voigt, V. *et al.* Murine cytomegalovirus m157 mutation and variation leads to immune  
1392 evasion of natural killer cells. *Proc. Natl. Acad. Sci. U. S. A.* **100**, 13483–13488 (2003).
- 1393 47. Bubić, I. *et al.* Gain of Virulence Caused by Loss of a Gene in Murine Cytomegalovirus. *J.*  
1394 *Virol.* **78**, 7536–7544 (2004).
- 1395 48. Rawlinson, W. D., Farrell, H. E. & Barrell, B. G. Analysis of the complete DNA sequence  
1396 of murine cytomegalovirus. *J. Virol.* **70**, 8833–8849 (1996).
- 1397 49. Stahl, F. R. *et al.* Nodular Inflammatory Foci Are Sites of T Cell Priming and Control of  
1398 Murine Cytomegalovirus Infection in the Neonatal Lung. *PLoS Pathog.* **9**, e1003828  
1399 (2013).
- 1400 50. Farber, J. M. A macrophage mRNA selectively induced by  $\gamma$ -interferon encodes a  
1401 member of the platelet factor 4 family of cytokines. *Proc. Natl. Acad. Sci. U. S. A.* **87**,  
1402 5238–5242 (1990).
- 1403 51. Luster, A. D., Unkeless, J. C. & Ravetch, J. V.  $\gamma$ -Interferon transcriptionally regulates an  
1404 early-response gene containing homology to platelet proteins. *Nature* **315**, 672–676  
1405 (1985).
- 1406 52. Sung, J. H. *et al.* Chemokine guidance of central memory T cells is critical for antiviral  
1407 recall responses in lymph nodes. *Cell* **150**, 1249–1263 (2012).
- 1408 53. Hickman, H. D. *et al.* CXCR3 chemokine receptor enables local CD8<sup>+</sup> T cell migration for  
1409 the destruction of virus-infected cells. *Immunity* **42**, 524–537 (2015).
- 1410 54. Kohlmeier, J. E. *et al.* CXCR3 Directs Antigen-Specific Effector CD4<sup>+</sup> T Cell Migration to  
1411 the Lung During Parainfluenza Virus Infection. *J. Immunol.* **183**, 4378–4384 (2009).
- 1412 55. Hokeness, K. L. *et al.* CXCR3-Dependent Recruitment of Antigen-Specific T Lymphocytes  
1413 to the Liver during Murine Cytomegalovirus Infection. *J. Virol.* **81**, 1241–1250 (2007).
- 1414 56. Maurice, N. J., McElrath, M. J., Andersen-Nissen, E., Frahm, N. & Prlic, M. CXCR3  
1415 enables recruitment and site-specific bystander activation of memory CD8<sup>+</sup> T cells. *Nat.*  
1416 *Commun.* **10**, 1–15 (2019).
- 1417 57. Müller, A. J. *et al.* CD4<sup>+</sup> T Cells Rely on a Cytokine Gradient to Control Intracellular  
1418 Pathogens beyond Sites of Antigen Presentation. *Immunity* **37**, 147–157 (2012).

- 1419 58. Wirtz, N. *et al.* Polyclonal cytomegalovirus-specific antibodies not only prevent virus  
1420 dissemination from the portal of entry but also inhibit focal virus spread within target  
1421 tissues. *Med. Microbiol. Immunol.* **197**, 151–158 (2008).
- 1422 59. Hasan, M. *et al.* Selective Down-Regulation of the NKG2D Ligand H60 by Mouse  
1423 Cytomegalovirus m155 Glycoprotein. *J. Virol.* **79**, 2920–2930 (2005).
- 1424 60. Marquardt, A. *et al.* Single cell detection of latent cytomegalovirus reactivation in host  
1425 tissue. *J. Gen. Virol.* **92**, 1279–1291 (2011).
- 1426 61. Stahl, F. R. *et al.* Mck2-dependent infection of alveolar macrophages promotes replication  
1427 of MCMV in nodular inflammatory foci of the neonatal lung. *Mucosal Immunol.* **8**, 57–67  
1428 (2015).
- 1429 62. Hirche, C. *et al.* Systemic Virus Infections Differentially Modulate Cell Cycle State and  
1430 Functionality of Long-Term Hematopoietic Stem Cells In Vivo. *Cell Rep.* **19**, 2345–2356  
1431 (2017).
- 1432 63. Anderson, K. G. *et al.* Intravascular staining for discrimination of vascular and tissue  
1433 leukocytes. *Nat. Protoc.* **9**, 209–222 (2014).
- 1434 64. Joller, N., Spörri, R., Hilbi, H. & Oxenius, A. Induction and protective role of antibodies in  
1435 *Legionella pneumophila* infection. *Eur. J. Immunol.* **37**, 3414–3423 (2007).
- 1436 65. Zurbach, K. A., Moghbeli, T. & Snyder, C. M. Resolving the titer of murine  
1437 cytomegalovirus by plaque assay using the M2-10B4 cell line and a low viscosity overlay.  
1438 *Virology* **11**, (2014).
- 1439 66. Starruß, J., De Back, W., Bruschi, L. & Deutsch, A. Morpheus: A user-friendly modeling  
1440 environment for multiscale and multicellular systems biology. *Bioinformatics* **30**, 1331–  
1441 1332 (2014).
- 1442 67. Berg, S. *et al.* ilastik: interactive machine learning for (bio)image analysis. *Nat. Methods*  
1443 **16**, 1226–1232 (2019).

1444

1445

1446

1447

1448

1449

1450

1451

1452

## Supplementary Figure 1

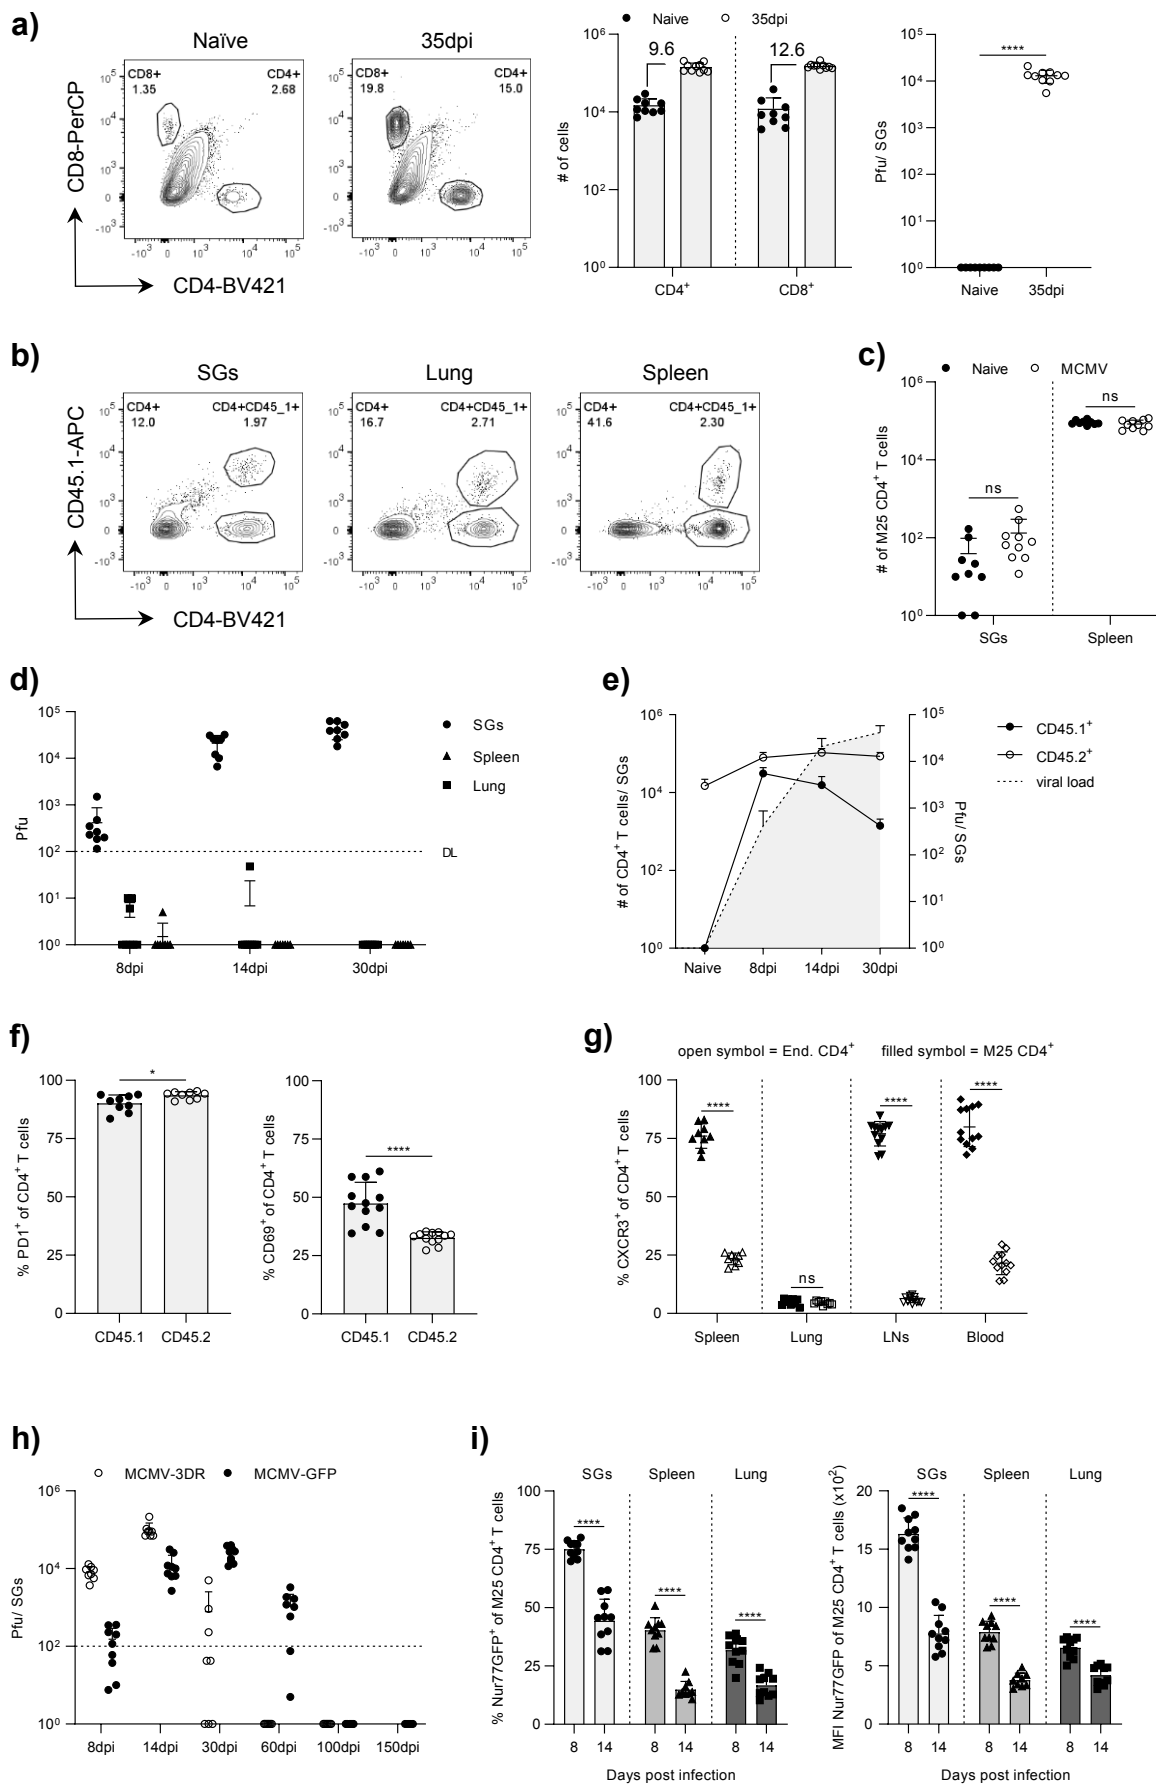

1454 **Supplementary Figure 1: Kinetics and phenotypic characterization of M25 CD4<sup>+</sup> T cells. a)**  
1455 Representative flow cytometry contour plots showing frequency of SG-localized CD4<sup>+</sup> and CD8<sup>+</sup>  
1456 T cells in naïve WT B6 mice and upon MCMV-GFP infection (left) with total T cell counts (middle)  
1457 and viral loads (right) in the SGs (n = 9 – 10 mice). **b)** Representative flow cytometry contour plots  
1458 of the SGs, spleens and lungs showing endogenous CD45.2<sup>+</sup> CD4<sup>+</sup> T cells and adoptively  
1459 transferred CD45.1<sup>+</sup> M25 CD4<sup>+</sup> T cells. **c)** Total numbers of M25 CD4<sup>+</sup> T cell counts in the SGs  
1460 and spleens one week post transfer into naïve or four weeks-infected B6 mice (n = 9 – 10 mice).  
1461 **d)** Viral loads in the SGs, spleens and lungs at indicated time points post MCMV-GFP infection (n  
1462 = 8 mice). **e)** Combined kinetics of SGs-infiltrating endogenous CD45.2<sup>+</sup>, adoptively transferred  
1463 CD45.1<sup>+</sup> M25 CD4<sup>+</sup> T cells, and viral burden in the SGs (n = 7 – 9 mice). **f)** Percentage of PD-1<sup>+</sup>  
1464 and CD69<sup>+</sup> CD4<sup>+</sup> T cells in the SGs (n = 9 mice). **g)** Percentage of CXCR3<sup>+</sup> CD4<sup>+</sup> T cells in various  
1465 organs at day 8 post MCMV-GFP infection (n = 9 – 12 mice). **h)** Kinetics of viral loads in the SGs  
1466 upon MCMV-3DR or MCMV-GFP infection (n = 8 – 9 mice). **i)** Percentage of Nur77GFP<sup>+</sup> M25  
1467 CD4<sup>+</sup> T cells (left) and MFI of Nur77GFP on M25 CD4<sup>+</sup> T cells (right) in SGs, spleens and lungs  
1468 at day 8 and 14 post MCMV-3DR infection (n = 9 – 10 mice). Data in **a** and **c – i** are shown as  
1469 mean + SD pooled from two independent experiments. Each symbol represents an individual  
1470 mouse. Statistical significance was determined using single (**a** and **f**) or multiple (**c**, **g** and **i**)  
1471 unpaired two-tailed t test. \*\*\*\*P<0.0001, ns = not significant.

1472

1473 .

1474

1475

1476

1477

1478

1479

1480

1481

1482

1483

1484

1485

1486

1487

1488

## Supplementary Figure 2

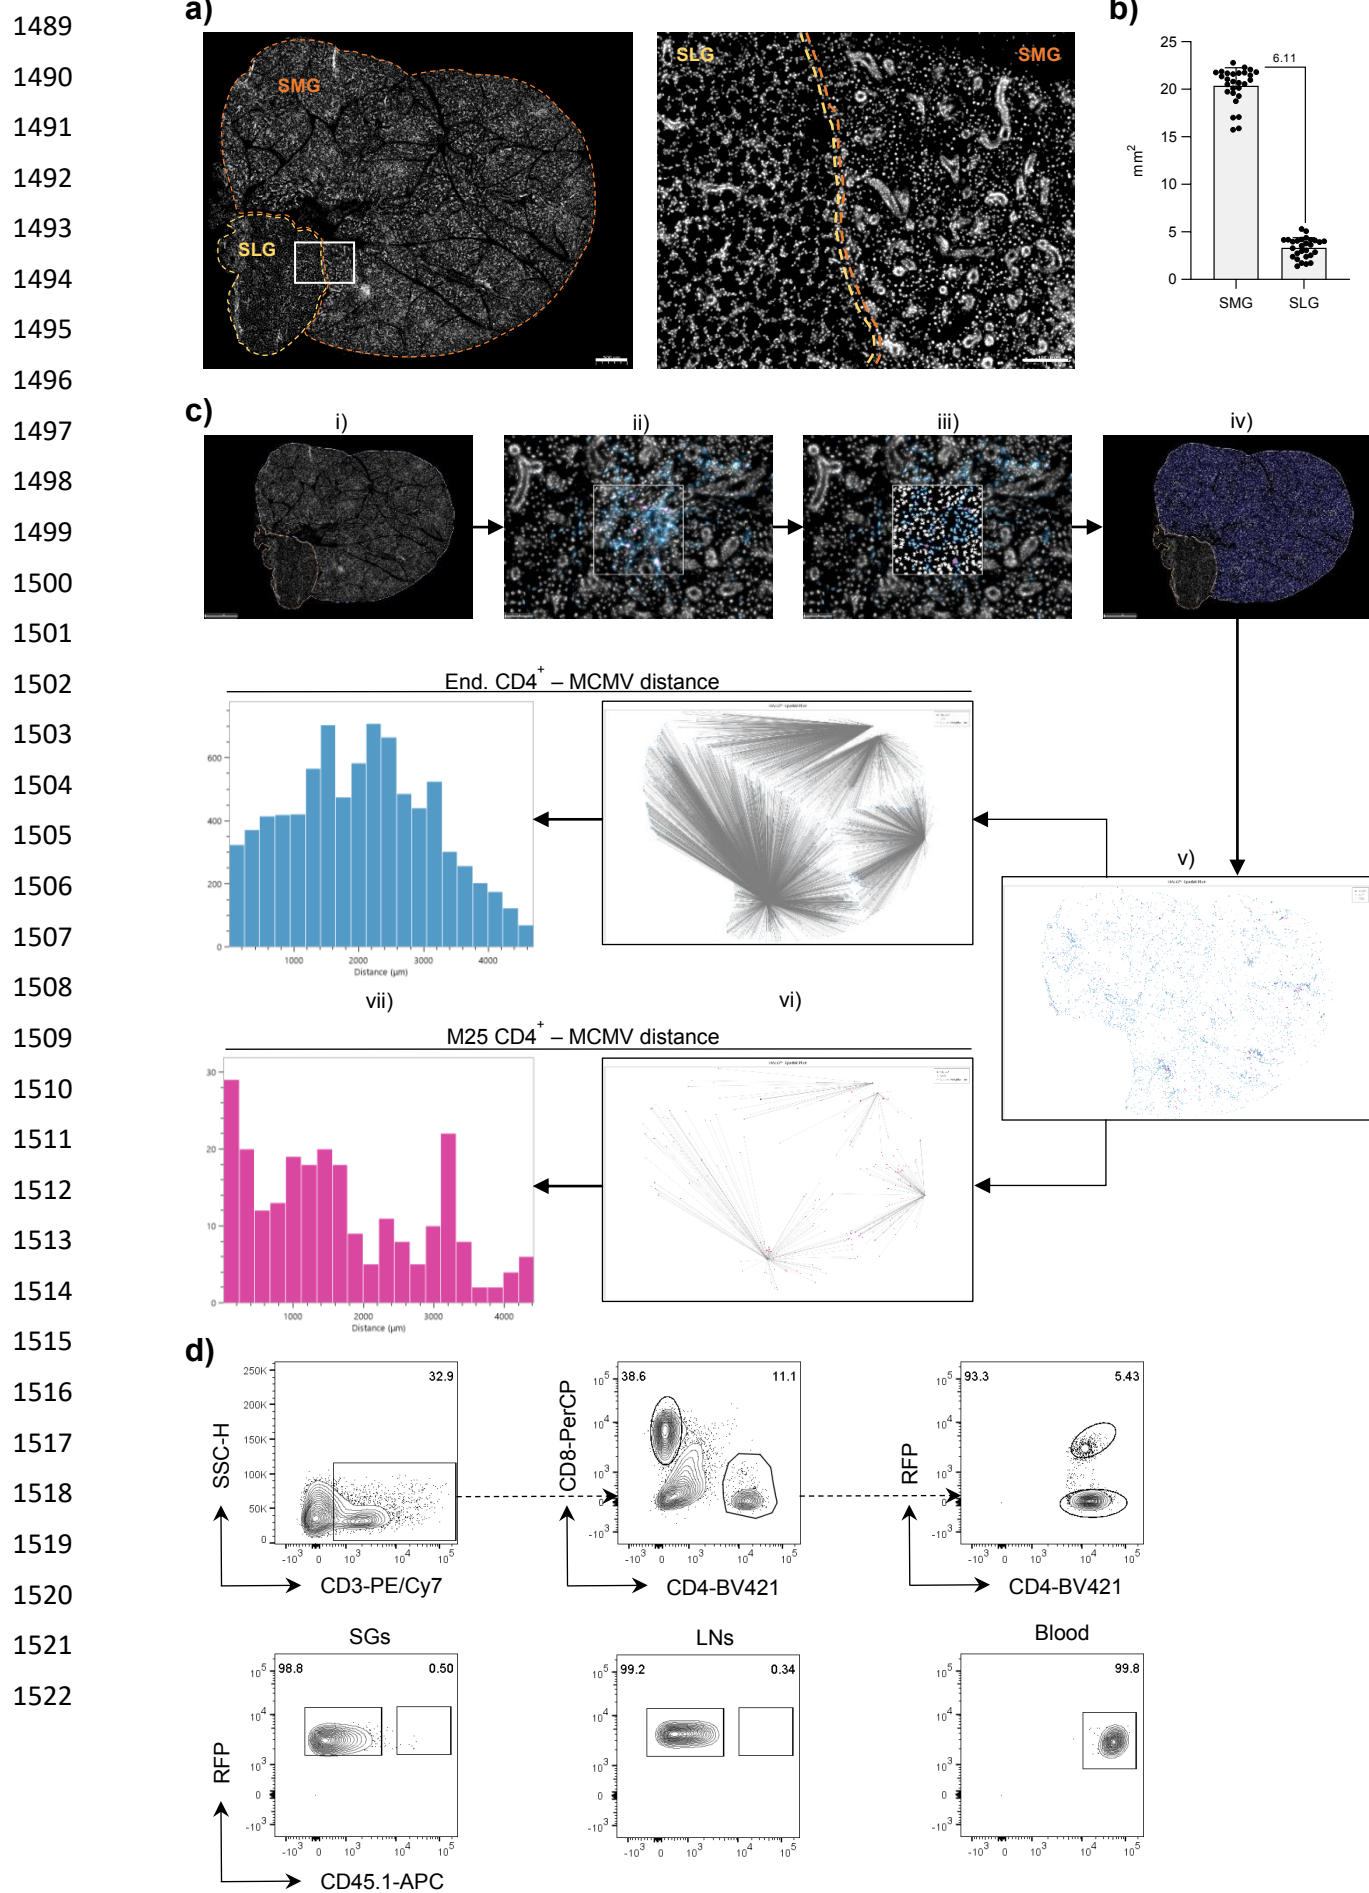

1523 **Supplementary Figure 2. Spatial localization of endogenous CD4<sup>+</sup> and M25 CD4<sup>+</sup> T cells in**  
1524 **the SGs. a)** Example of the right SG lobe with magnified region; perimeters of the submandibular  
1525 and sublingual gland, SMG and SLG respectively, are indicated by dotted lines. **b)** Area of SMGs  
1526 and SLGs. **c)** Image processing procedure: i) Tissue Annotation (i.e. SMGs and SLGs), ii)  
1527 unmodified, original FOV within the SMGs and iii) after applying cell segmentation and phenotypic  
1528 characterization (HighPlex FL module), iv) application of the HighPlex FL module to the whole  
1529 annotation layer (i.e. SMGs), v) “Reduced” image consisting of extracted endogenous CD4<sup>+</sup> and  
1530 M25 CD4<sup>+</sup> T cells from total cells together with infection foci, vi) Nearest neighbor analyses  
1531 between endogenous CD4<sup>+</sup> or M25 CD4<sup>+</sup> T cells and infection foci and vii) representative  
1532 histogram of overall distances between endogenous CD4<sup>+</sup> and M25 CD4<sup>+</sup> T cells and infection  
1533 foci. **d)** I.v. labeling of M25 CD4<sup>+</sup> T cells in various organs. MACS purified, RFP expressing M25  
1534 CD4<sup>+</sup> T cells were adoptively transferred into naïve WT B6 one day prior MCMV-GFP infection. At  
1535 day 8 post MCMV-GFP infection, 3 µg of anti-CD45.1 antibody was injected i.v. 3 min prior harvest.  
1536 M25 CD4<sup>+</sup> T cells were identified by the RFP signal. Upper row: Gating strategy, lower row:  
1537 Representative flow cytometry contour plots of SGs, SG draining LNs and blood. Plots are  
1538 representative of n = 5 mice from one experiment. Scale bar in **b** = 500 µm (left) and 100 µm  
1539 (right).  
1540  
1541  
1542  
1543  
1544  
1545  
1546  
1547  
1548  
1549  
1550  
1551  
1552  
1553  
1554  
1555  
1556  
1557

### Supplementary Figure 3

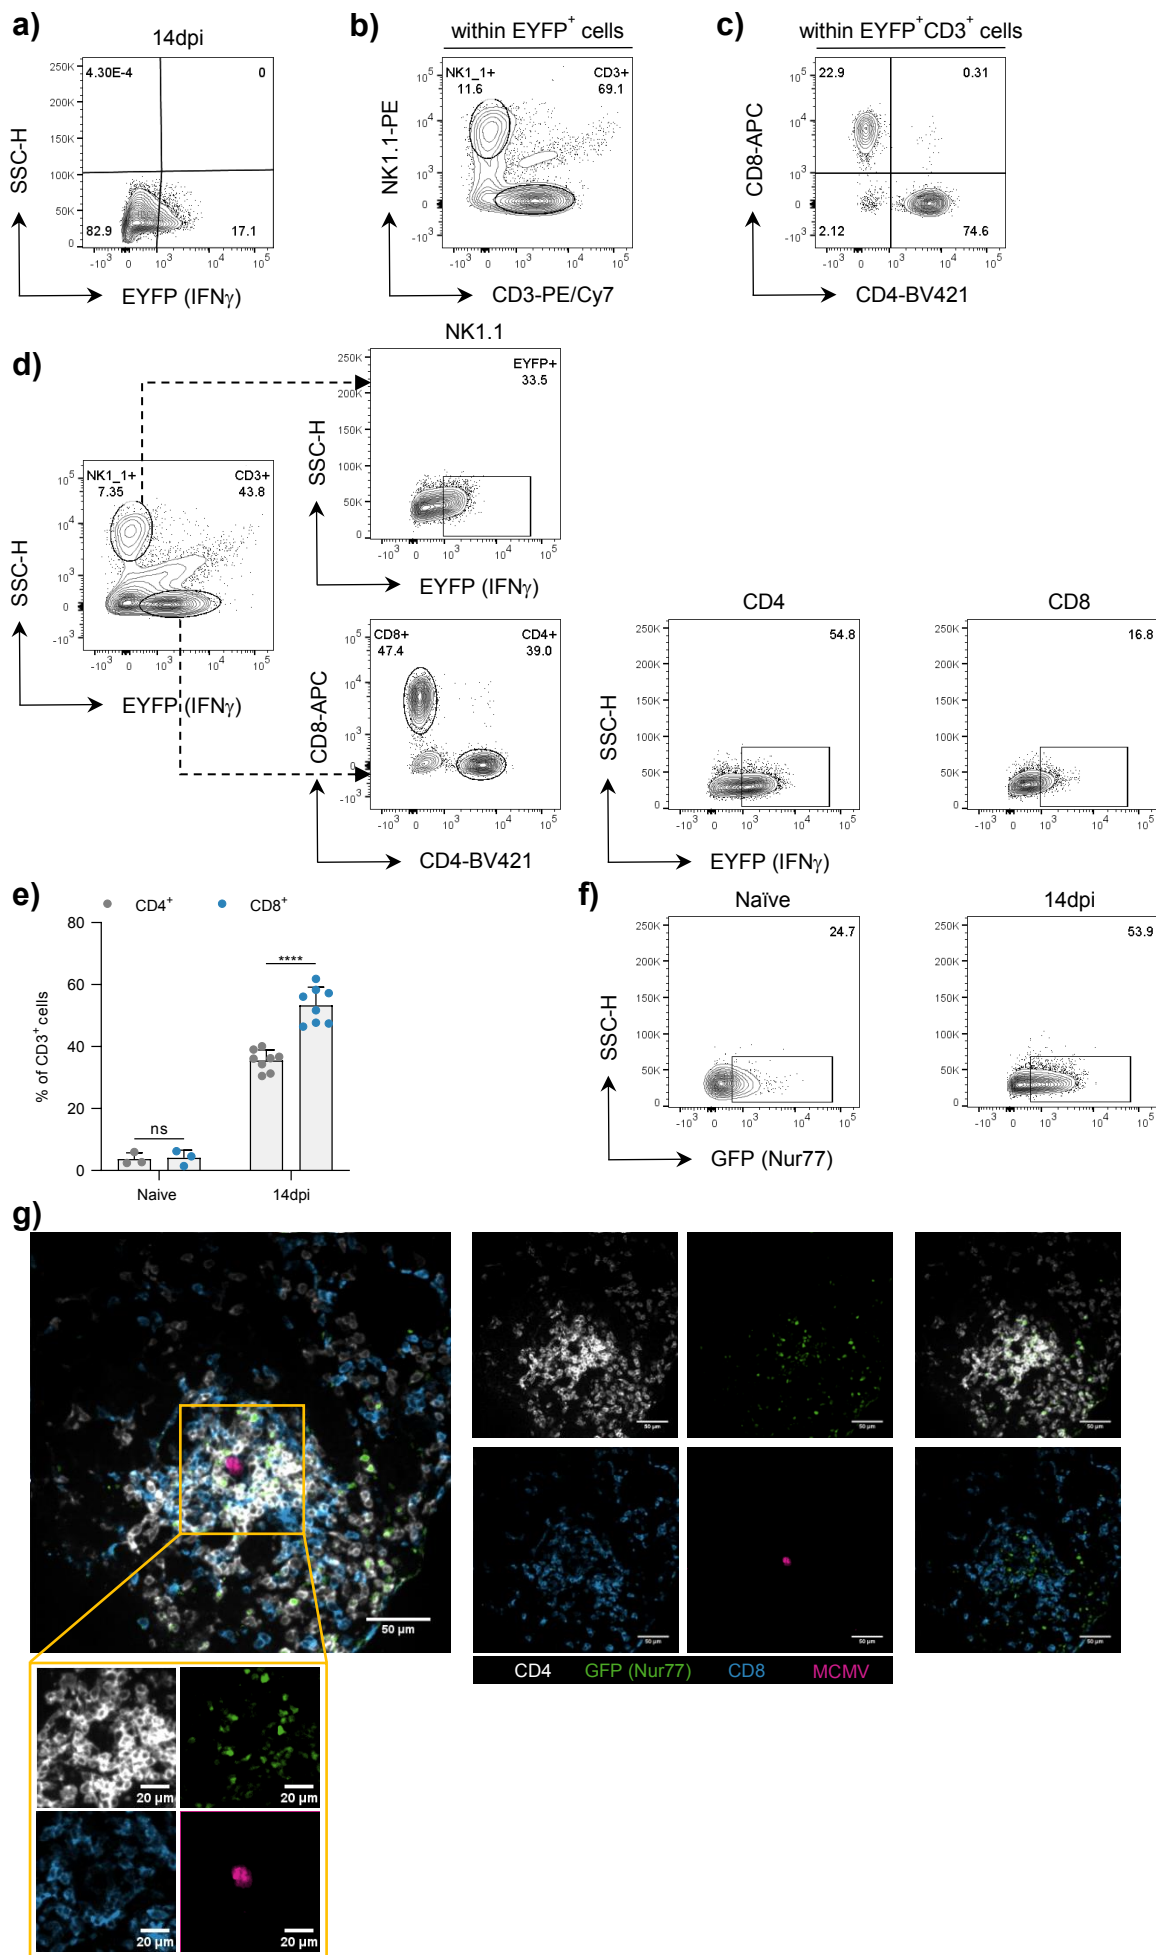

1559 **Supplementary Figure 3. IFN $\gamma$  production by CD4<sup>+</sup> T cells in MCMV-3DR-infected SGs. a –**  
1560 **c) Representative flow cytometry contour plots showing gating strategy. a)** Frequencies of EYFP<sup>+</sup>  
1561 cells upon MCMV-3DR infection. **b and c)** Further subgating of the EYFP<sup>+</sup> cell fraction. **d)**  
1562 Representative flow cytometry contour plots of MCMV-3DR infected SGs showing gating strategy  
1563 to determine the percentage of EYFP<sup>+</sup> cells within CD4<sup>+</sup>, CD8<sup>+</sup> and NK1.1<sup>+</sup> cells. **e)** Percentage  
1564 of CD4<sup>+</sup> and CD8<sup>+</sup> T cells within CD3<sup>+</sup> cells in naïve and MCMV-3DR infected Great mice. **f)**  
1565 Representative flow cytometry contour plots of Nur77GFP expression in SG-residing CD4<sup>+</sup> T cells  
1566 in naïve and MCMV-3DR infected Nur77GFP mice. **g)** Example of a four color FOV of a Nur77GFP  
1567 mouse-derived SG 14 days post MCMV-3DR infection (left). Single color channel images (middle),  
1568 merged two color CD4/GFP (right, upper row) and CD8/GFP (right, lower row) images. Magnified  
1569 region (yellow frame) region split in four single color channel images. Data in **e)** are shown as  
1570 mean + SD of n = 3 and n = 8 infected Great mice pooled from 2 independent experiments.  
1571 Statistical significance in **e)** was determined using multiple unpaired two-tailed t test.  
1572 \*\*\*\*P<0.0001, ns = not significant. Scale bar in **g** = 50  $\mu$ m or 20  $\mu$ m (magnified region).

1573

1574

1575

1576

1577

1578

1579

1580

1581

1582

1583

1584

1585

1586

1587

1588

1589

1590

1591

1592

1593



## Supplementary Figure 4

a)

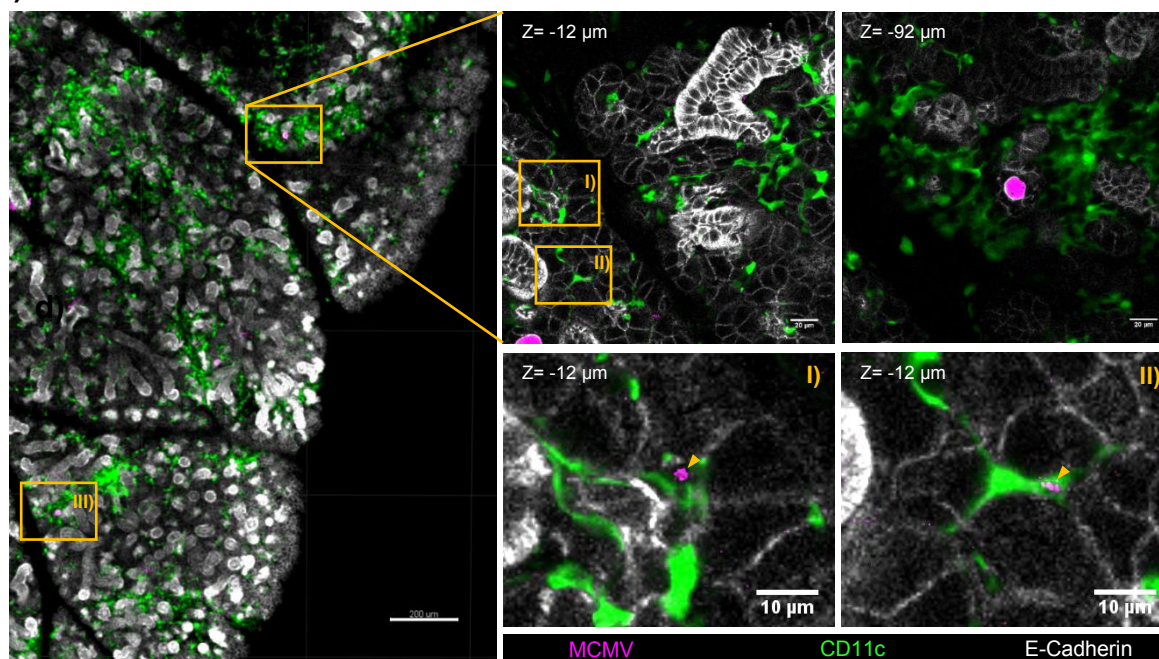

b)

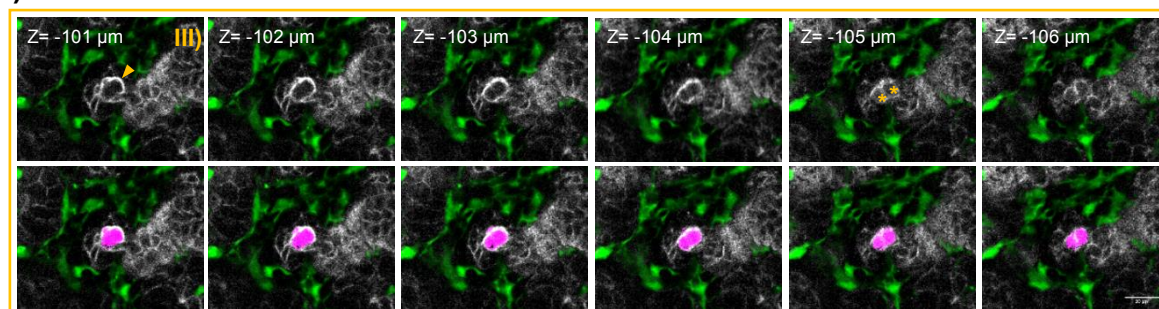

c)

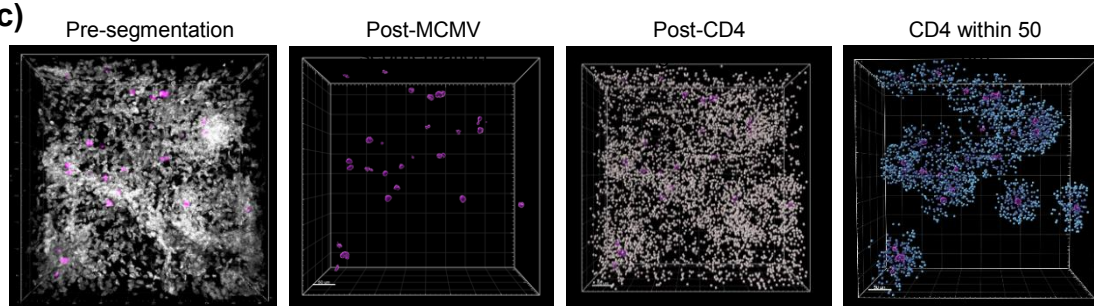

d)

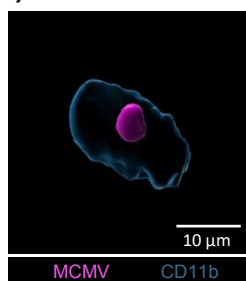

1595 **Supplementary Figure 4: Processing and assignment of MCMV-3DR signals in the SGs. a)**  
1596 Example of a three color FOV of a CD11cYFP-Prox1morange mouse-derived SG 14 days post  
1597 MCMV-3DR infection (left, scale bar = 200  $\mu\text{m}$ ) with magnified regions (right, scale bar = 20  $\mu\text{m}$   
1598 (top) and 10  $\mu\text{m}$  (bottom)) at indicated z-positions. **b)** Magnified region of **a** (yellow frame: III) at  
1599 sequential z-planes without (upper row) and with (lower row) MCMV-3DR encoding mcherry signal  
1600 (scale bar = 20  $\mu\text{m}$ ). Yellow arrowheads in **a** and **b** indicate engulfment of possible remnants of  
1601 previously infected cells in CD11c<sup>+</sup> cells and large actively infected E-Cadherin<sup>+</sup> cells, respectively.  
1602 Yellow asterisks in **b** show two neighboring MCMV-3DR infected E-Cadherin<sup>+</sup> cells. **c)**  
1603 Segmentation process for spatial analysis. From left to right: Unprocessed 3D reconstruction,  
1604 post-segmentation of MCMV signal as surfaces, post-segmentation of the CD4 signal as spots  
1605 and CD4<sup>+</sup> T cells within 50  $\mu\text{m}$  to next site of viral replication. Scale bar = 50  $\mu\text{m}$ . **d)** 3D  
1606 reconstructions of MCMV-3DR-associated mcherry signal within a CD11b<sup>+</sup> cell 8 dpi. Scale bar =  
1607 10  $\mu\text{m}$ .

1608  
1609  
1610  
1611  
1612  
1613  
1614  
1615  
1616  
1617  
1618  
1619  
1620  
1621  
1622  
1623  
1624  
1625  
1626  
1627  
1628

## Supplementary Figure 5

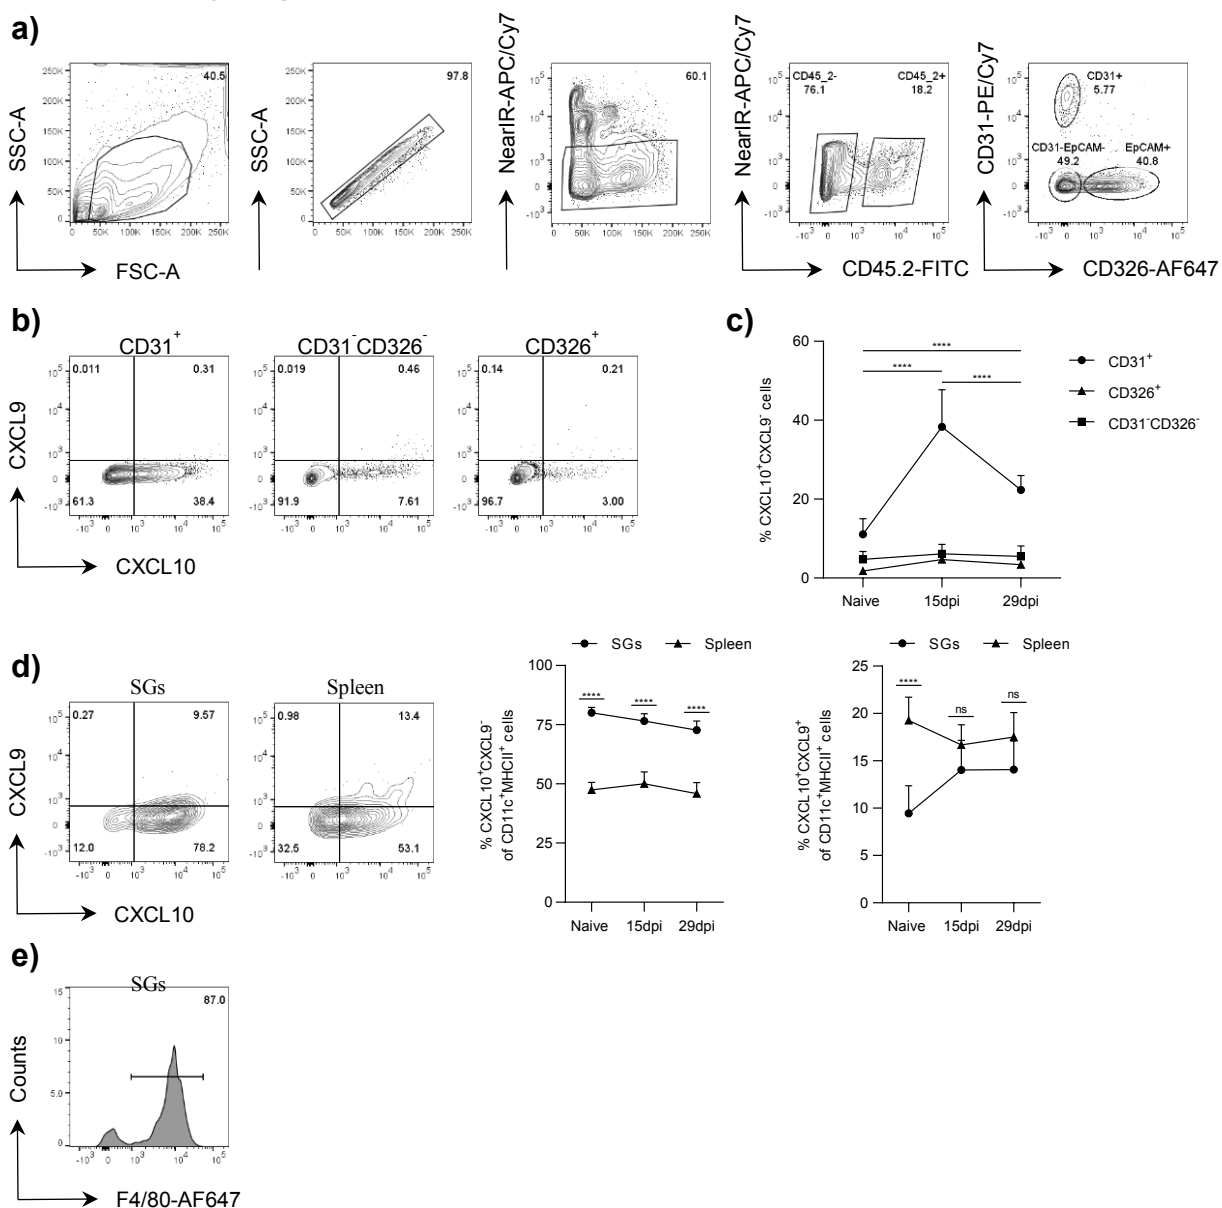

1629

1630

1631

1632

1633

1634

1635

1636

1637

1638

1639

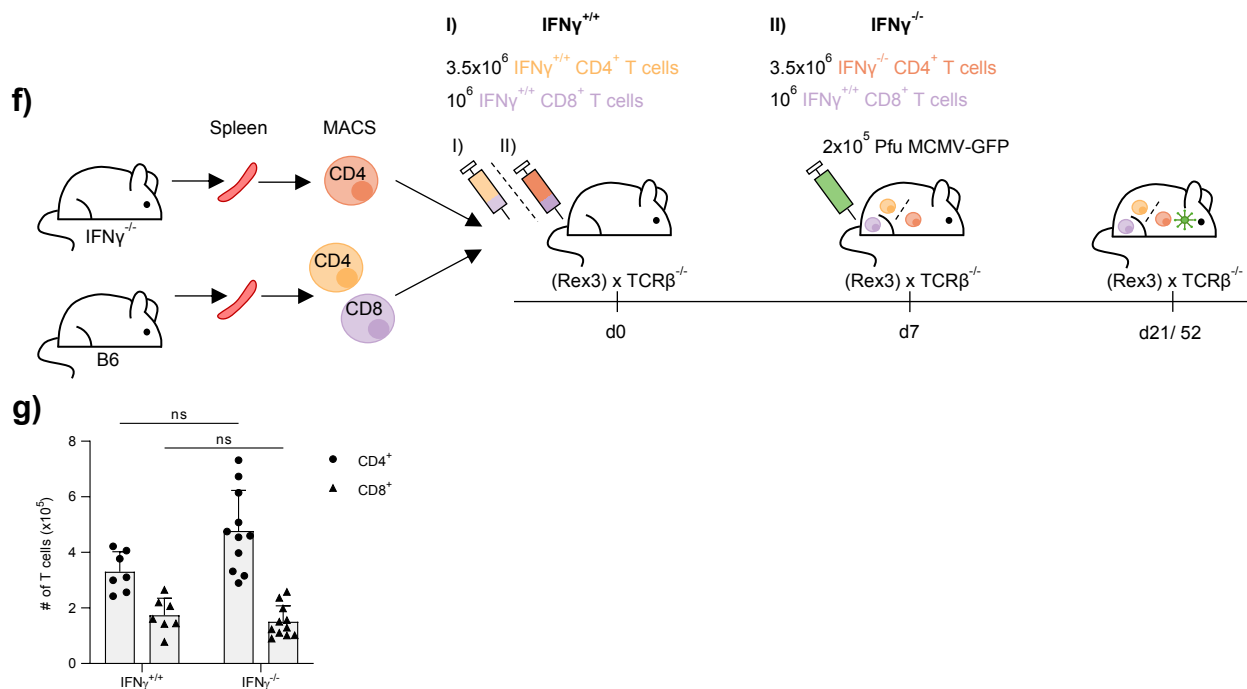

1640 **Supplementary Figure 5. CXCL9 and CXCL10 expression and their role in MCMV-infected**  
1641 **SGs. a and b)** Representative flow cytometry contour plots showing gating strategy of non-  
1642 hematopoietic cells **(a)** and CXCL9 and CXCL10 expression levels **(b)** in defined non-  
1643 hematopoietic cell compartments 15 days post MCMV-GFP infection **c)** Percentage of indicated  
1644 CXCL10<sup>+</sup> non-hematopoietic cells at indicated time points. **d)** Representative flow cytometry  
1645 contour plots (left) and percentages (middle & right) of CXCL9 and CXCL10<sup>+</sup> CD11c<sup>+</sup>MHCII<sup>+</sup> cells  
1646 at indicated time points post MCMV-GFP infection in the SGs and spleen. **e)** Representative  
1647 histogram of F4/80 expression levels in CD11c<sup>+</sup>MHCII<sup>+</sup> cells of the SGs 15 days post MCMV-GFP  
1648 infection. **f)** Experimental approach. T cells from spleens of naïve WT B6 (IFN $\gamma$ <sup>+/+</sup>) and IFN $\gamma$ KO  
1649 (IFN $\gamma$ <sup>-/-</sup>) mice were purified using anti-CD4 or anti-CD8 $\alpha$  MACS beads. 3.5x10<sup>6</sup> IFN $\gamma$  competent  
1650 (IFN $\gamma$ <sup>+/+</sup>) or IFN $\gamma$  deficient (IFN $\gamma$ <sup>-/-</sup>) CD4<sup>+</sup> T cells and 10<sup>6</sup> IFN $\gamma$  competent CD8<sup>+</sup> T cells were  
1651 adoptively co-transferred into naïve Rex3 x TCR $\beta$ <sup>-/-</sup> or TCR $\beta$ <sup>-/-</sup> mice seven days prior MCMV-GFP  
1652 infection. Flow cytometric and microscopic analyses of CXCL9 and CXCL10 expression were  
1653 performed 14 dpi, viral burden was evaluated 14 and 45 dpi. **g)** Total numbers of CD4<sup>+</sup> and CD8<sup>+</sup>  
1654 T cells in the SGs 14 dpi. Data in **c** and **d** are shown as mean + SD of n = 6 - 8 Rex3 mice pooled  
1655 from two independent experiments. Each symbol in **c** and **d** represents the mean of pooled mice.  
1656 Statistical significance was determined using 2-way Anova with post hoc Tukey's multiple  
1657 comparisons test (**c**) or multiple unpaired two-tailed t test (**d & g**). \*\*\*\*P<0.0001, ns = not  
1658 significant.

1659

1660

1661

1662

1663

1664

1665

1666

1667

1668

1669

1670

1671

1672

1673

1674

## Supplementary Figure 6

1675

a)

1676

1677

1678

1679

1680

1681

1682

1683

1684

1685

1686

1687

1688

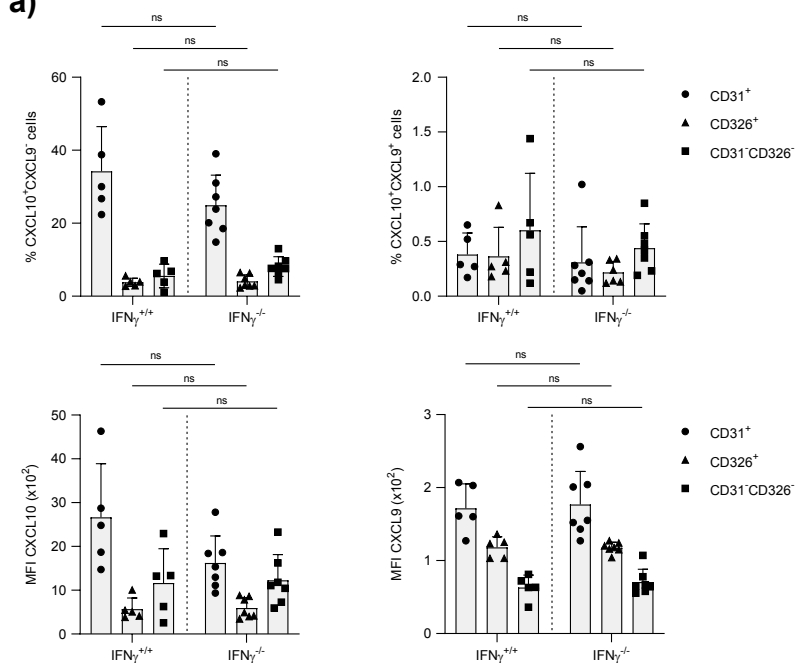

1689

b)

1690

1691

1692

1693

1694

1695

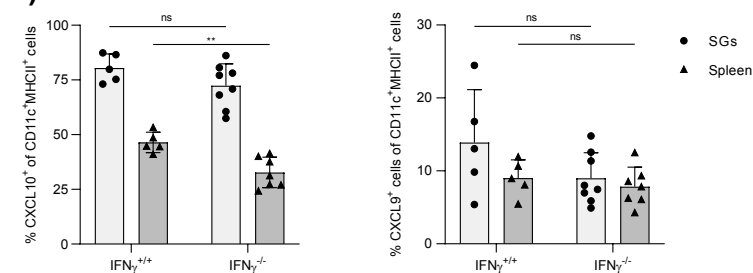

1696

c)

1697

1698

1699

1700

1701

1702

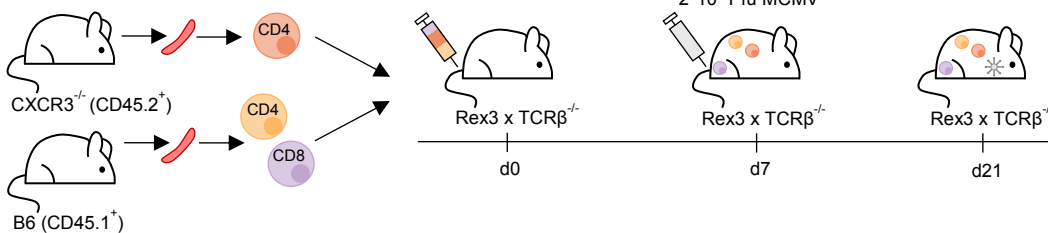

1703

d)

1704

1705

1706

1707

1708

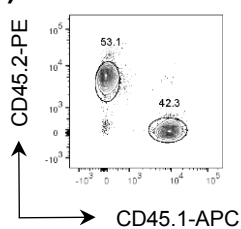

e)

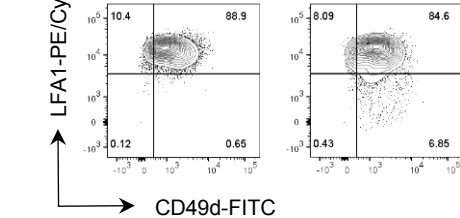

1709 **Supplementary Figure 6. CXCR3-mediated recruitment of T cells to sites of CXCL9 and**  
1710 **CXCL10 expression in MCMV-infected SGs. a)** Percentage (upper row) and MFI (lower row) of  
1711 CXCL9 and CXCL10 expression in indicated non-hematopoietic cell types in the SGs 14 dpi. **b)**  
1712 Percentage of CXCL9<sup>+</sup> and CXCL10<sup>+</sup> CD11c<sup>+</sup>MHCII<sup>+</sup> cells in the SGs and spleen 14 dpi. **c)**  
1713 Experimental approach. T cells from spleens of naïve WT B6 (CD45.1<sup>+</sup>, CXCR3<sup>+/+</sup>) and CXCR3<sup>-/-</sup>  
1714 mice (CD45.2<sup>+</sup>) were purified using anti-CD4 or anti-CD8 $\alpha$  MACS beads. 3.\*10<sup>6</sup> CXCR3  
1715 competent (CD45.1<sup>+</sup>CXCR3<sup>+/+</sup>) and CXCR3 deficient (CD45.2<sup>+</sup>CXCR3<sup>-/-</sup>) CD4<sup>+</sup> T cells, together  
1716 with CXCR3 competent CD8<sup>+</sup> T cells, were adoptively co-transferred into naïve Rex3 x TCR $\beta$ <sup>-/-</sup>  
1717 mice seven days prior MCMV infection. Flow cytometric and microscopic analyses were performed  
1718 14 dpi. **d)** Representative flow cytometry contour plots of CD45.1<sup>+</sup>(CXCR3<sup>+/+</sup>) and CD45.2<sup>+</sup>  
1719 (CXCR3<sup>-/-</sup>) CD4<sup>+</sup> T cells and **e)** CD49d<sup>+</sup>LFA-1<sup>+</sup> CD4<sup>+</sup> T cells in the SGs 14 dpi. Data in **a & b** are  
1720 shown as mean + SD of n = 5 - 8 Rex3 x TCR $\beta$ <sup>-/-</sup> mice pooled three independent experiments.  
1721 Graphs in **d)** and **e)** are representative of n = 4 mice from one independent experiment.  
1722 Each symbol in **a** and **b** represents an individual mouse. Statistical significance was determined  
1723 using multiple unpaired two-tailed t test (**b**), or 2-way Anova with post hoc Tukey's multiple  
1724 comparisons test (**c & d**). \*P<0.05, ns = not significant.

1725

1726

1727

1728

1729

1730

1731

1732

1733

1734

1735

1736

1737

1738

1739

1740

1741

1742

1743

1744 **Supplementary Figure 7**

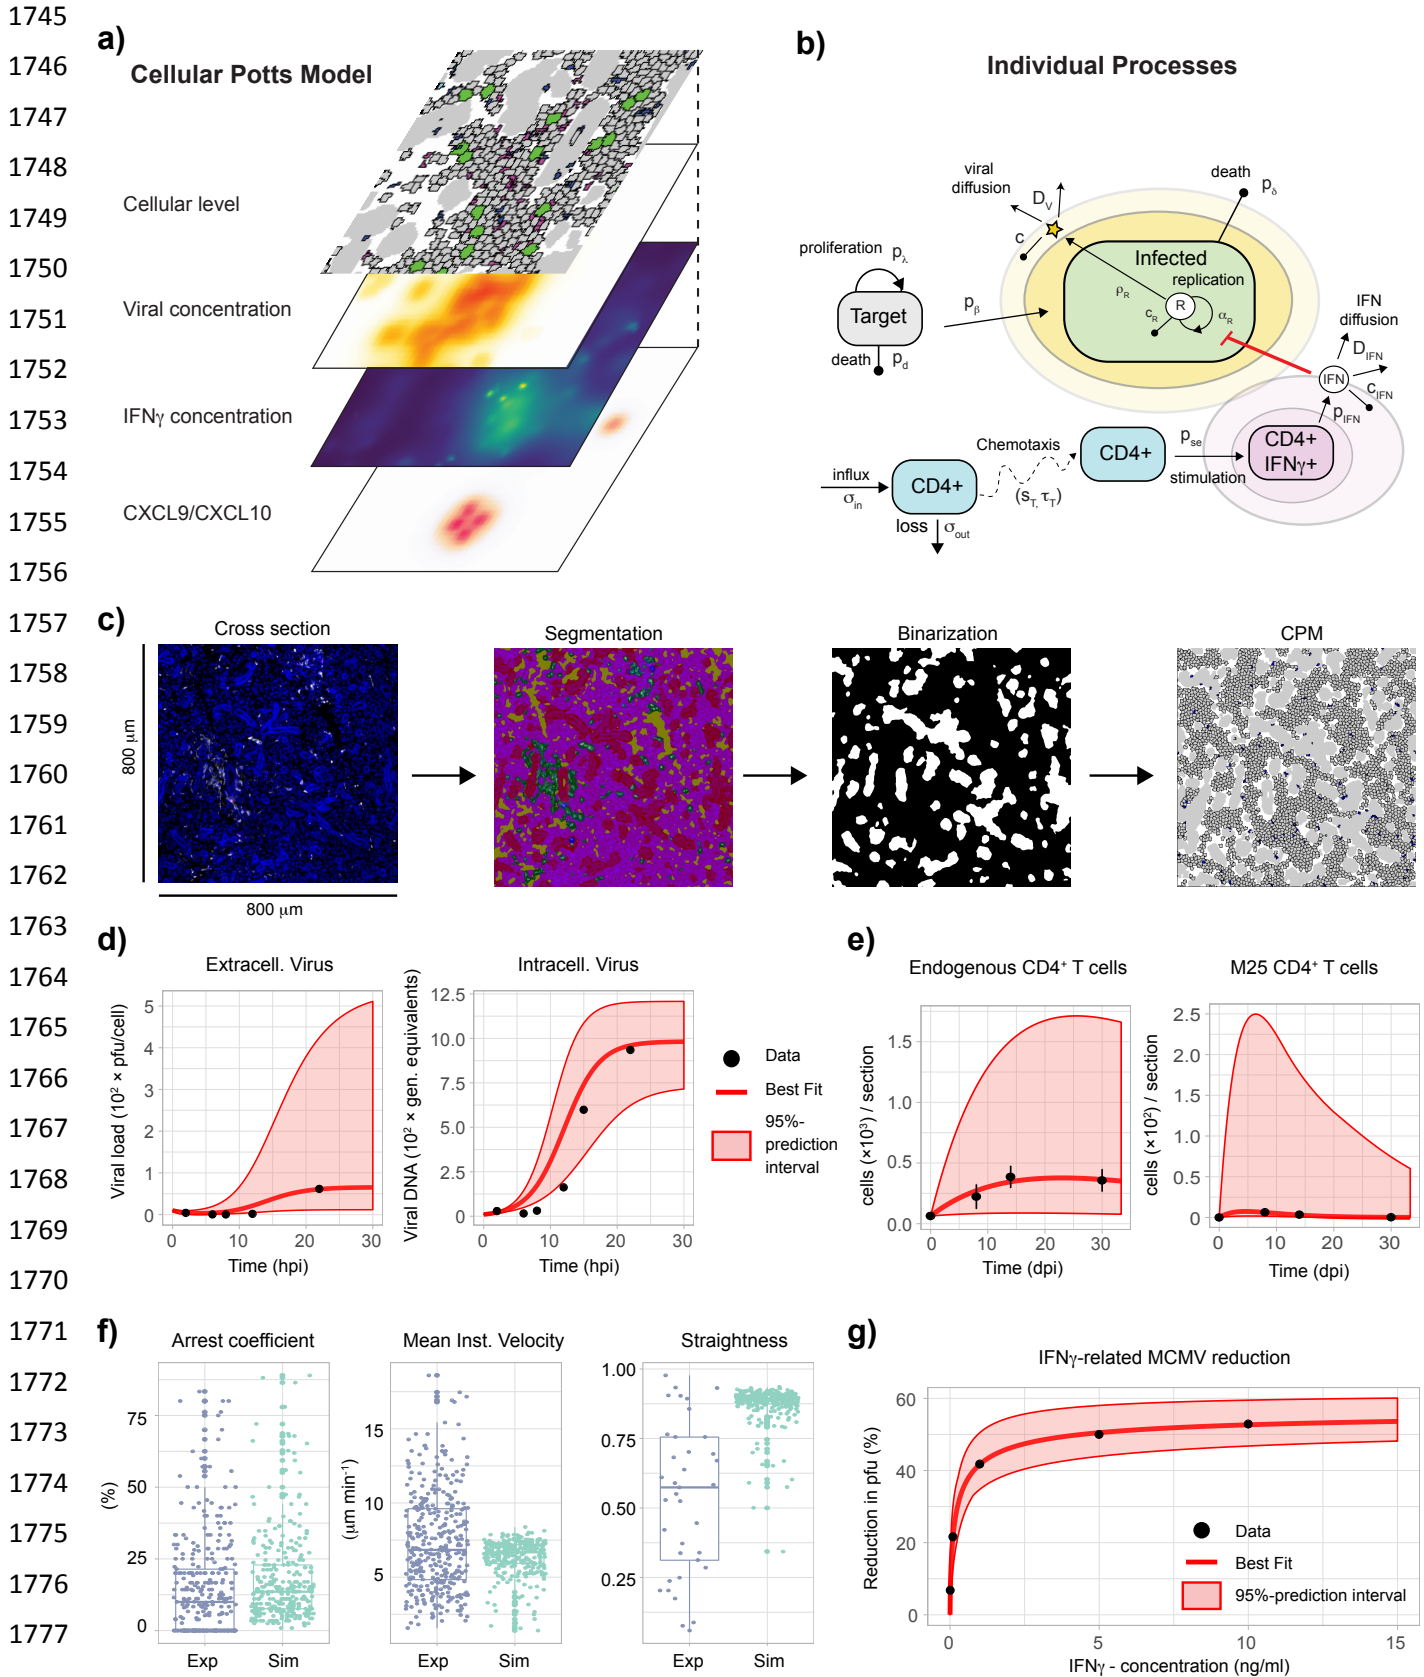

1778 **Supplementary Figure 7. Mathematical modeling of viral-immune interactions in the SGs.**

1779 **a)** Sketch of the structure of the multi-scale cellular Potts model used to simulate viral-immune  
1780 interaction in the SMG. Different interconnected layers account for the spatiotemporal dynamics  
1781 of individual cells in interaction with CXCL9/CXCL10, IFN $\gamma$ , and extracellular MCMV  
1782 concentrations. **b)** Individual processes considered within the CPM that describe the turnover and  
1783 infection of epithelial cells, intracellular viral replication, as well as the motility and stimulation of  
1784 CD4<sup>+</sup> T cells, and diffusion of virus and IFN $\gamma$ . Individual parameters are explained in detail within  
1785 the **Supplemental Information - Text S1**. **c)** Representation of the ductal structure within the  
1786 simulations by using 800×800  $\mu\text{m}^2$  areas selected from SMG cross section images that were  
1787 segmented to distinguish ductal cells (*red*), M25 (*blue*) and endogenous (*green*) CD4<sup>+</sup> T cells, cell  
1788 free areas (*yellow*), and remaining cells (purple) using *HALO* and *ilastik* software. Segmented  
1789 images were converted to binary images to distinguish between ductal (*white*) and non-ductal  
1790 (*black*) areas, with non-ductal areas later populated by epithelial cells within the CPM. **d)**  
1791 Experimental data digitalized from (Misra et al., 1977) and best fit to describe MCMV viral  
1792 replication dynamics based on Eq. (8). **e)** Infiltration dynamics of endogenous (upper panel) and  
1793 M25 CD4<sup>+</sup> T cells (lower panel) using Eq. (9) and experimental data (see **Text S1**). **f)** CD4<sup>+</sup> T cell  
1794 motility dynamics as predicted by fitting the CPM to the data of (Stolp et al., 2020) on CD8<sup>+</sup> T cell  
1795 dynamics in the SG. The distributions of the arrest coefficient, mean instant velocity and  
1796 straightness for the data (*blue*) and model predictions (*cyan*) following 300 T cells over 1h are  
1797 shown, with model predictions based on the best parameterization obtained by the FitMultiCell  
1798 approach. **g)** Dose-response curve for the effect of IFN $\gamma$  on MCMV replication efficiency  
1799 parameterized based on Eq. (10) and the data of (Lucin et al., 1994). Panels **(d)**, **(e)**, and **(g)**  
1800 indicate experimental data (*black dots*), best model fits (*red line*) and 95%-prediction bands (*red*  
1801 *shaded area*). All individual parameter estimates are shown in **Text S1**.

1802

1803

1804

1805

1806

1807

1808

1809

1810

1811



1812 **Supplementary Video 1. 3D visualization of CD4<sup>+</sup> T cells and MCMV-3DR-associated**  
1813 **mcherry signals (sites of viral replication and small remnants).** 3D reconstruction of CD4<sup>+</sup> T  
1814 cells (white) and MCMV-3DR-associated mcherry signals (magenta) in the SMG at 8 dpi. Small  
1815 mcherry volumes represent remnants or apoptotic bodies and large mcherry volumes sites of  
1816 infectious virus production.

1817  
1818 **Supplementary Video 2. Quantitative analysis of CD4<sup>+</sup> T cells within 50 μm to each MCMV-**  
1819 **3DR-associated mcherry signal.** Successive 3D processing of mcherry-expressing MCMV-3DR  
1820 (magenta) as surfaces and CD4<sup>+</sup> T cells (white) as spots with further thresholding of these spots  
1821 within 50 μm (cyan) to each MCMV-3DR-associated mcherry signal in the SMG. Major tick  
1822 intervals = 50 μm.

1823  
1824 **Supplementary Video 3. Ex vivo live imaging of CD11c<sup>+</sup> cell phagocytosing MCMV-3DR-**  
1825 **derived small remnants.** Times series of CD11c<sup>+</sup> cell (green) phagocytosing surrounding MCMV-  
1826 3DR-associated remnants (magenta) at 9 dpi. Scale bar = 3 μm. Time in hours: minutes: seconds:  
1827 milliseconds.

1828  
1829 **Supplementary Video 4. 3D reconstruction of accumulating CD11c<sup>+</sup> cells and CD4<sup>+</sup> T cells.**  
1830 3D processing of MCMV-3DR-associated mcherry signals (magenta), CD4<sup>+</sup> T cells (white) and  
1831 CD11c<sup>+</sup> cells (green) as surfaces in the SMG at 14 dpi. Zoom-in on small remnants within CD11c<sup>+</sup>  
1832 cells.

1833  
1834  
1835  
1836  
1837  
1838  
1839  
1840  
1841  
1842  
1843  
1844  
1845

## 1846 Supplemental Information Text S1-

### 1847 1848 **Mathematical model of MCMV infection and immune dynamics in the** 1849 **salivary glands**

1850 We developed a multi-scale mathematical model to study the spatiotemporal dynamics of MCMV  
1851 infection and CD4<sup>+</sup> T cell dynamics in the salivary glands (SG). The model follows the dynamics  
1852 and fate of individual cells while accounting for intra- and extracellular processes, such as  
1853 intracellular viral replication and extracellular viral diffusion, respectively. It is built as a cellular  
1854 Potts Model (CPM) using the software Morpheus (<http://morpheus.gitlab.io>; (Starruss et al., 2014)),  
1855 which provides a 2D-representation of the observed tissue structure and accounts for individual  
1856 cell morphology, motility and their spatial location. A CPM is a lattice-based model with individual  
1857 cells defined by several connected lattice sites (Glazier and Graner, 1993; Graner and Glazier,  
1858 1992). Each cell is characterized by a specific cell type, as well as a unique identifier  $w$  and the  
1859 position within the grid,  $(i,j)$ . The motility and dynamics of individual cells is then determined by  
1860 stochastic events that regulate the interaction between grid sites (Glazier and Graner, 1993). Our  
1861 model considers the turnover and infection of epithelial cells, the diffusion and clearance of  
1862 extracellular virus, as well as the infiltration, migration and locally confined release of IFN $\gamma$  of  
1863 endogenous and M25-specific CD4<sup>+</sup> T cells. A sketch of the model and its structure is shown in  
1864 **Figure S7a,b**. A detailed description of the individual model components, as well as their  
1865 parameterization based on own experimental data and data from the literature is given in the  
1866 following.

1867

### 1868 **The multi-scale mathematical model**

#### 1869 **Epithelial cells and viral replication**

1870 The multi-scale model provides a 2D-representation of the tissue structure of the submandibular  
1871 salivary glands (SMG) as observed in the experimental cross sections. Epithelial cells, which form  
1872 the structure of the solid tissue, are immobile, and die and proliferate with probability  $p_\lambda$  and  $p_d$ ,  
1873 respectively. Hereby,  $p_\lambda$  is defined by

$$1874 \quad p_\lambda = 1 - \exp\left(-\lambda\left(1 - \frac{N}{N_{max}}\right)\right) \quad (1)$$

1875 with  $\lambda$  defining the maximal proliferation rate,  $N_{max}$ , the maximal cell density and  $N$  the current  
1876 number of epithelial cells to ensure tissue homeostasis in response to cell turnover or tissue  
1877 damage. Uninfected epithelial cells, i.e., target cells, get infected by MCMV dependent on the viral  
1878 concentration,  $V$ , at the location of the cell. The probability of infection,  $p_\beta$ , is given by

1879

$$1880 \quad p_\beta = 1 - \exp(-\beta V) \quad (2)$$

1881 Hereby, the parameter  $\beta$  defines a scaling factor, which determines transmission of infection  
1882 dependent on the extracellular viral concentration. Upon infection, epithelial cells will double in

1883 size (Munger et al., 2006) and start replication of intracellular viral RNA,  $R$ , which is modeled by a  
 1884 system of ordinary differential equations following logistic-growth with

$$1885 \quad \frac{dR}{dt} = \begin{cases} \alpha_R R \left(1 - \frac{R}{R_{max}}\right) - \rho_R R & \text{during active viral replication} \\ -c_R R - \rho_R R & \text{after stop of viral replication} \end{cases} \quad (3)$$

1886 Hereby,  $R_{max}$  defines the maximal carrying capacity of the cell, and  $\alpha_R$ ,  $\rho_R$  and  $c_R$  the net-  
 1887 replication, viral export and intracellular viral clearance rate, respectively. The stop of viral  
 1888 replication, as e.g. mediated by  $IFN_\gamma$ , is represented by the switch to the second case in Eq. (3)  
 1889 in which the virus gets degraded with rate  $c_R$  and is continued to be exported until intracellular  
 1890 virus vanishes (see also (Rand et al., 2012)). As MCMV suppresses cell cycle progression  
 1891 (Marcinowski et al., 2012), cell division of infected cells is not considered within the simulations,  
 1892 while death occurs with probability  $p_\delta$ .

1893 Once exported, extracellular virus diffuses through the tissue with diffusion coefficient  $D_V$ . Thus,  
 1894 the concentration of extracellular virus is modeled by a reaction-diffusion system given by

$$1895 \quad \begin{aligned} \frac{\partial V}{\partial t} &= D_V \nabla^2 V + f(V) \\ f(V) &= \frac{dV_{ij}}{dt} = \rho_R R_{ij} - c_R V_{ij} \end{aligned} \quad (4)$$

1896 Hereby,  $f(V)$ , describes viral export,  $\rho_R$ , and viral degradation,  $c_R$ , at each specific lattice site  $(i,j)$   
 1897 within the grid, with  $R_{ij} = 0$  for all lattice sites that belong to uninfected cells. To determine the  
 1898 probability of an uninfected cell,  $\omega$ , to get infected (Eq. (2)), the viral concentration is averaged  
 1899 over all lattice sites that belong to the uninfected cell, i.e.  $V_\omega = 1/|\omega| \sum_{(i,j) \in \omega} V_{ij}$ .

1900 Local concentrations of  $IFN_\gamma$  can inhibit viral replication in infected cells with probability  
 1901  $p_{IFN_\gamma}$  defined by

$$1902 \quad p_{IFN_\gamma} = 1 - \exp(-g(IFN)) \quad (5)$$

1903 with  $g(IFN)$  determining the dose-response relationship for  $IFN_\gamma$  given by

$$1904 \quad g(IFN) = \frac{y_{max}}{1 + \left(\frac{ED_{50}}{IFN}\right)^n} \quad (6)$$

1905 Hereby define  $y_{max}$  the maximal inhibition efficacy,  $ED_{50}$  the effective dose at which 50% of cells  
 1906 are inhibited, and  $n$  a Hill-coefficient. Upon inhibition of intracellular viral replication, the  
 1907 concentration of intracellular viral RNA will follow the second case of Eq. (3). As the effect of  $IFN_\gamma$   
 1908 on the replication rate of MCMV infected cells was shown to be reversible (Kropp et al., 2011;  
 1909 Presti et al., 1998), infected cells can loose the replication inhibition without maintained  $IFN_\gamma$   
 1910 signaling. An infected cell is considered as an active, MCMV replicating cell (MCMV<sup>+</sup>) and, thus,  
 1911 visible by light microscopy, if the intracellular viral load  $R$  is larger than a threshold of 100 ( $R > 100$ ).  
 1912  
 1913  
 1914

## 1915 **CD4<sup>+</sup> T cells and IFN<sub>γ</sub> release**

1916 In contrast to epithelial cells, endogenous and M25 CD4<sup>+</sup> T cells are considered as motile cells  
1917 that enter and leave the tissue with time-dependent influx and efflux rates,  $\sigma_{in}$  and  $\sigma_{out}$ . Within the  
1918 tissue, CD4<sup>+</sup> T cells follow persistent motion modeled with persistent strength  $s_T$  and decay time  
1919  $\tau_T$ . The movement of CD4<sup>+</sup> T cells can be influenced by chemokine fields, e.g. CXCL9 and  
1920 CXCL10 chemotactic gradients as mediated by antigen presenting cells (APC). The attraction of  
1921 cells is defined by the chemotactic strength,  $CTX$ , that determines the strength at which the  
1922 gradient can deviate the direction of the CD4<sup>+</sup> T cell. Stimulation of CD4<sup>+</sup> T cells leading to release  
1923 of IFN<sub>γ</sub> depends on interaction of CD4<sup>+</sup> T cells with APC or infected cells dependent on the  
1924 scenario (see below). When stimulated, the CD4<sup>+</sup> T cell becomes temporally immobile and will  
1925 secrete IFN<sub>γ</sub> with rate  $\sigma_{IFN}$ . Analogously to the extracellular virus, the dynamics of the IFN<sub>γ</sub>  
1926 concentration within the system is then described by

$$\begin{aligned} \frac{\partial IFN}{\partial t} &= D_{IFN} \nabla^2 IFN + f(IFN) \\ f(IFN) &= \frac{dIFN_{ij}}{dt} = \rho_{IFN} IFN_{ij} - c_{IFN} IFN_{ij} \end{aligned} \quad (7)$$

1928  
1929 Hereby,  $D_{IFN}$  defines the 2D-diffusion coefficient of IFN<sub>γ</sub>, and  $f(IFN)$  describes the release,  $\rho_{IFN}$ ,  
1930 and extracellular clearance,  $c_{IFN}$ , of IFN<sub>γ</sub> at each specific lattice site  $(i,j)$ . To calculate the  
1931 probability of inhibiting viral replication in infected cell  $\omega_I$  according to Eq. (3) and (4), the IFN<sub>γ</sub>  
1932 concentration is averaged over all lattice sites that belong to an infected cell, i.e.,  $IFN =$   
1933  $1/|\omega_I| \sum_{(i,j) \in \omega_I} IFN_{ij}$ .

## 1935 **Parameterization and Model adaptation**

1936 The individual components and processes of the model were parameterized based on own  
1937 experimental data and data from the literature. For some of the processes where reliable  
1938 measurements are missing, parameter sweeps were performed with model results challenged  
1939 against the experimental data to evaluate reasonable parameterizations. Sensitivity of results with  
1940 regard to selected parameter combinations were performed.

### 1942 **SGM tissue structure**

1943 Recapitulation of the tissue structure was achieved by segmenting microscopy images of cross  
1944 sections of the SMG using Ilastik Version 1.3.3.pos3 (<https://www.ilastik.org>, (Berg et al., 2019)).  
1945 Duct structures were extracted as binary masks and loaded as background into Morpheus. The  
1946 images were then populated by immobile epithelial cells representing acinar glandular epithelial  
1947 cells as the main target cells for MCMV (Fox, 2006; Walton et al., 2011). Duct areas were left  
1948 empty (**Figure S7c**). The spatial localization of immune and infected cells was measured on 20-  
1949 22  $\mu\text{m}^2$  cross sections, which is an unfeasible system size for the simulations. For computational  
1950 efficiency, only small sections of  $800 \times 800 \mu\text{m}^2$  of the SMG tissue were considered, with the  
1951 actually observed 2D-tissue cross sections being 31-34-fold larger (e.g.  $\sim 20\text{-}22 \text{ mm}^2$ ). Simulations  
1952 were run with a scaling factor of 1 pixel (px) =  $2 \mu\text{m}$  to allow simulation of larger areas. The cell

1953 area of target and infected cell was determined using microscopy images of the SG cross sections  
 1954 with labelled MCMV-GFP infected cells. The average diameter of infected cells was determined  
 1955 as  $\sim 17.54 \mu\text{m}$  leading to an average area of  $241.6 \mu\text{m}^2$ . Target cells, i.e., uninfected epithelial  
 1956 cells, were set to half of the area of infected cells (Kwak et al., 2016; Munger et al., 2006), i.e.,  
 1957  $120.8 \mu\text{m}^2$  (**Table A**).

1958 At the beginning of a simulation,  $\sim 2500$  target cells were initialized within the grid defining the  
 1959 maximal population capacity of the system  $N_{max}$ . This corresponds to the average area of  $\sim 46\%$   
 1960 that was covered by non-immune and non-duct cells within the observed cross sections. With  
 1961 epithelial cells usually having a relatively long lifespan of 2-4 months (Aure et al., 2015; Schwartz-  
 1962 Arad et al., 1988), the probability of uninfected epithelial cells to die,  $p_d$ , is  $\Gamma$ -distributed with scale  
 1963 and shape parameters determined by  $k_T=40$  and  $\theta_T=55$  leading to an expected lifespan of  $\sim 3$   
 1964 months. With MCMV-infected cells observed to remain viable for 36-48h (Fox, 2006) cell death of  
 1965 infected cells,  $p_\delta$ , was modeled analogously according to  $\Gamma(k_I=0.25, \theta_I=170)$ .

1966

### 1967 Intracellular viral replication

1968 The dynamics of intracellular viral replication and export as described in Eq. (3) was parameterized  
 1969 using *in vitro* experimental data on the viral synthesis in MCMV infected mouse embryo fibroblasts  
 1970 (MEF)(Misra et al., 1977). In this experiment, MEFs in cell culture were infected with MCMV and  
 1971 the number of genome equivalents and pfu per cell were determined at frequent time points in  
 1972 between 0 and 22 hours post infection (**Figure S7d**). The data allowed us to simultaneously  
 1973 estimate the net-viral replication rate,  $\alpha_R$ , extracellular viral degradation,  $c$ , and viral export,  $\rho_R$ ,  
 1974 using a single coherent data set. To analyze the data and estimate these parameters, the system  
 1975 in Eq. (3) was extended by

$$\begin{aligned}
 \frac{dR}{dt} &= \begin{cases} \alpha_R R \left(1 - \frac{R}{R_{max}}\right) - \rho_R R & \text{during active viral replication} \\ -c_R R - \rho_R R & \text{after stop of viral replication} \end{cases} \\
 \frac{dV_1}{dt} &= -cV_1 \\
 \frac{dV_2}{dt} &= \rho_R R - cV_2
 \end{aligned} \tag{8}$$

1977 which distinguishes between the extracellular viral load applied to the system at the start of the  
 1978 experiment,  $V_1$ , and the newly produced virions by the infected cells,  $V_2$ . Eq. (8) was fitted to the  
 1979 data using  $V = V_1 + V_2$ . Based on these analyses we estimated a net viral replication rate of  $\alpha_R =$   
 1980  $0.41 \text{ h}^{-1}$  (0.38, 0.49), a maximal carrying capacity of  $R_{max} = 1060$  genome equivalents (1020,  
 1981 1260), a viral export rate of  $\rho_R = 0.03$  pfu/gen. equivalent  $\text{h}^{-1}$  (0.02, 0.11) and a viral degradation  
 1982 rate of  $c = 0.45 \text{ h}^{-1}$  (0.20, 1.65), with numbers in brackets indicating 95%-confidence intervals of  
 1983 estimates. As the rates of intracellular viral replication and degradation could not be determined  
 1984 separately based on these experimental data, the rate of intracellular RNA degradation,  $c_R$ , was  
 1985 set to the extracellular degradation rate,  $c_R = c$ . The experimental data with model predictions and  
 1986 all parameter estimates are shown in **Figure S7d** and **Table A**, respectively. For technical details  
 1987 on the fitting procedure please see section **Parameter fitting and estimation procedures**. While  
 1988 the model predicts saturation of the viral concentrations  $\sim 24$  h corresponding to the assumed

1989 length of the replication cycle of MCMV (Misra et al., 1977), it slightly underestimates the lag time  
1990 before the start of rapid viral replication leading to earlier viral export.

1991

## 1992 **MCMV spread and cell proliferation**

1993 There are three factors that influence the degree and extend of MCMV spread and tissue  
1994 pathology within the salivary glands in the absence of any immune response: This includes (i) viral  
1995 spread, as defined by the scaling factor  $\beta$  regulating the infection probability,  $p_\beta$ , dependent on  
1996 the extracellular viral concentration,  $V$  (Eq. (2)), (ii) extracellular viral diffusion defined by the  
1997 diffusion coefficient  $D_V$  (Eq. (4)), and (iii) tissue regeneration determined by the cell proliferation  
1998 parameter  $\lambda$  (Eq. (1)). Individual assessment of the parameters  $\beta$  and  $\lambda$  is generally difficult due  
1999 to their strong interdependency and the lack of appropriate experimental data. Therefore, we  
2000 performed combined sweeps of  $\beta$  and  $\lambda$  to identify appropriate parameter combinations. Model  
2001 simulations without the presence of immune responses were challenged against the following  
2002 observations and assumptions to restrict parameter values:

2003 1.) As our data indicate high infection levels at 8 dpi, parameter  $\beta$  should be chosen to allow  
2004 a considerable spread of the infection within the tissue already at 8 dpi. This is used to set  
2005 a lower bound for  $\beta$ .

2006 2.) Even without the presence of CD4<sup>+</sup> T cell immunity, we assumed that the virus is incapable  
2007 of leading to the complete lysis of large tissue sections at 8 dpi. These comparisons  
2008 allowed us to determine an upper boundary to  $\beta$  and a lower bound to  $\lambda$ .

2009 3.) MCMV indicates local spread within tissue (Wirtz et al., 2008) leading to infectious foci.  
2010 This observation was used to balance the relationship between  $\beta$  and  $D_V$  that regulates  
2011 the extent of viral spread.

2012 Previous measurements indicate a viral diffusion coefficient for MCMV in between  $D_V = 4.4 \mu\text{m}^2/\text{s}$   
2013 -  $6.4 \mu\text{m}^2/\text{s}$  (Dick et al., 2015). However, given the long time period (~60 days) required for our  
2014 simulations, we used an effective viral diffusion coefficient of  $D_V^{eff} = 64 \mu\text{m}^2/\text{h}$  in our model, which  
2015 resulted in locally confined virus fields around the infected cell. As the choice of  $D_V^{eff}$  is  
2016 compensated by the choice of the unknown scaling parameter  $\beta$ , this does not affect our analyses,  
2017 but substantially increases computational efficiency. Otherwise simulation time would increase by  
2018 ~100-fold, making it unfeasible for our analyses. Accounting for the observations in (1.) - (3.)  
2019 mentioned above, we finally set  $\lambda = 0.204 \text{ h}^{-1}$  and  $\beta = 1.5 \times 10^{-3} \text{ pfu}^{-1} \text{ h}^{-1}$  to scale tissue regeneration  
2020 and infection spread in our simulations. With these parameters we obtained preferential local  
2021 spread of the infection as observed in (Wirtz et al., 2008), but also seeding of new infections at  
2022 distant locations due to viral diffusion. In general, the maintenance of the tissue, as well as the  
2023 dynamics of infection was sensitive to the choices of  $\lambda$  and  $\beta$ . More detailed measurements will  
2024 be needed to appropriately curtail both values for future analyses.

2025

2026

## 2027 **CD4<sup>+</sup> T cell infiltration dynamics**

2028 In agreement with the experimental data, our model distinguishes between endogenous and M25  
2029 CD4<sup>+</sup> T cells. Both cell types are modeled with a targeted T cell area of ~50 μm<sup>2</sup> corresponding to  
2030 a T cell diameter of ~8 μm which is at the lower bound of average T cell sizes.

2031 To parameterize the infiltration dynamics of CD4<sup>+</sup> T cells into the SMG during the time course of  
2032 the infection, we used our experimental measurements. The numbers of endogenous and M25  
2033 CD4<sup>+</sup> T cells were determined at 0, 8, 14 and 30 dpi for the total SMG, and for specified cross  
2034 sections at 8 dpi. Based on the ratio of CD4<sup>+</sup> T cells on the cross sections and the total SMG at 8  
2035 dpi, we calculated the expected density of endogenous and M25 CD4<sup>+</sup> T cells in a defined area of  
2036 800×800 μm<sup>2</sup> as used for our simulations (**Table B**). The population dynamics of CD4<sup>+</sup> T cells in  
2037 the SMG can then be described by the following system of ordinary differential equations to  
2038 determine the net-flux and loss of cells in and out of the SMG,

$$\begin{aligned} \frac{dE}{dt} &= -\sigma_{in}E \\ \frac{dT}{dt} &= \sigma_{in}E - \sigma_{out}T \end{aligned} \quad (9)$$

2040 Hereby,  $E$  and  $T$  define the concentration of CD4<sup>+</sup> T cells outside and within the SMG, respectively,  
2041 and  $\sigma_{in}$  and  $\sigma_{out}$  the rate of influx and loss of cells. Eq. (9) was fitted separately for endogenous  
2042 and M25 CD4<sup>+</sup> T cells based on the experimental data shown in **Table B**. Best fits and 95%-  
2043 confidence intervals are shown in **Table A** with experimental data and model predictions shown  
2044 in **Figure S7e**. All parameters for endogenous cells were identifiable, while low cell counts slightly  
2045 impaired parameter identifiability for M25 CD4<sup>+</sup> T cells.

2046 The estimates were then used to parameterize the appearance and loss of endogenous and M25  
2047 CD4<sup>+</sup> T cells in our CPM. At each time step, a total number of  $\sigma_{in}E(t)$  cells was randomly placed  
2048 on the grid to simulate CD4<sup>+</sup> T cell infiltration. In addition, a CD4<sup>+</sup> T cell was removed from the  
2049 tissue with probability  $p_{out} = 1 - \exp(-\sigma_{out})$ . For technical reasons, CD4<sup>+</sup> T cells were initialized  
2050 at the positions of ductal structures and moved into the tissue from these points of entry. To guide  
2051 this process, a gradient from the center to the borders of the duct structures was introduced. CD4<sup>+</sup>  
2052 T cells moved against the gradient and into the tissue with a chemotactic strength set to  $CTX_{duct} =$   
2053 1, which resulted in a homogeneous distribution of the CD4<sup>+</sup> T cells in the grid. Larger values  
2054 would result in strong borders between the acinar and ductal areas and inhomogeneous  
2055 distribution of the CD4<sup>+</sup> T cells over the grid.

2056

## 2057 **CD4<sup>+</sup> T cell motility within the SMG**

2058 Parameters to describe CD4<sup>+</sup> T cell motility within the SMG were determined using data from two-  
2059 photon intravital microscopy analyses on the dynamics of CD8<sup>+</sup> T cells in the SMG during  
2060 lymphocytic choriomeningitis virus infection (Stolp et al., 2020) assuming similar motility  
2061 characteristics of both cell types. T cells were observed to move in the SMG with an average  
2062 speed of 6.8 μm/min, a top speed of 18 μm/min and were characterized with a low arrest coefficient  
2063 (Stolp et al., 2020). Thus, these data indicate a fast motion with rare motility arrest and frequent  
2064 direction changes.

2065 Cell motility of CD4<sup>+</sup> T cells was implemented in Morpheus using persistent motion, which is  
2066 described by the persistence strength,  $s_T$ , and the decay time  $\tau_T$ , defining the weight and the  
2067 maintenance with which a cell pursues a specific target direction, respectively. The parameters  
2068 were estimated using the FitMultiCell-pipeline (<https://fitmulticell.gitlab.io>) with simulations  
2069 following 300 CD4<sup>+</sup> T cells over a time period of 1h. Best estimates revealed a persistence strength  
2070 of  $s_T = 180$  and decay time of  $\tau_T = 8.9$  min assuming no deviation by chemotactic gradients ( $CTX=0$ ).  
2071 With these parameters, simulated T cell motility dynamics showed similar mean velocities and  
2072 distribution of arrest coefficients, but constrained maximal velocities and higher straightness than  
2073 observed in the experimental data (**Figure S7f**). These deviations are affected by the chosen  
2074 temporal and spatial discretization of the simulation environment. Decreasing the time step size  
2075 of the model would improve parameter fitting but substantially affects computational run time of  
2076 the model. However, given the level of detail aimed for in our analyses, CD4<sup>+</sup> T cell motility was  
2077 sufficiently represented by the parameterization shown above.

2078

### 2079 **CD4<sup>+</sup> T cell stimulation, IFN $\gamma$ dynamics and CXCL9/CXCL10 gradients**

2080 Within the SMG, CD4<sup>+</sup> T cells can get stimulated to release IFN $\gamma$ , which inhibits viral replication  
2081 within infected cells. In our simulations we distinguish between two scenarios of CD4<sup>+</sup> T cells  
2082 stimulation: (i) without and (ii) with the consideration of antigen presenting cells (APC). In a  
2083 scenario without the consideration of APC, CD4<sup>+</sup> T cells are stimulated by the direct contact with  
2084 antigen, i.e., infected cells. The probabilities of endogenous and M25 CD4<sup>+</sup> T cells to get  
2085 stimulated,  $p_{se} = 1 - \exp(-\lambda_{se})$  and  $p_{sm} = 1 - \exp(-\lambda_{sm})$ , respectively, were adjusted using  
2086 previous observations from the literature (Verma et al., 2016). Assessing the percentage of IFN $\gamma$   
2087 secreting CD4<sup>+</sup> T cells at 8 days post MCMV infection within various organs, Verma et al. (Verma  
2088 et al., 2016) measured that 8 to 15% of CD4<sup>+</sup> T cells, and 15-30% of epitope-specific cells were  
2089 IFN $\gamma$ <sup>+</sup>. To broadly reflect these dynamics, parameters  $\lambda_{se} = 0.05 \text{ h}^{-1}$  and  $\lambda_{sm} = 0.15 \text{ h}^{-1}$  were chosen.  
2090 With this parameterization, we observed that  $14.4 \pm 5.17 \%$  and  $29.1 \pm 12.1 \%$  (mean  $\pm$  SD of 10  
2091 replicates) of CD4<sup>+</sup> and M25 CD4<sup>+</sup> T cells, respectively, were IFN $\gamma$ <sup>+</sup> within our simulations (e.g.  
2092 Figure 7 in the main manuscript), which is at the upper end of the observed intervals.

2093 **APC related activation:** In the second scenario, we considered the additional effect of APC on  
2094 CD4<sup>+</sup> T cell motility dynamics and stimulation. APCs are suggested to have a macrophage-like  
2095 phenotype that present MCMV-antigen after phagocytosis of apoptotic remains of infected cells  
2096 (Walton et al., 2011). Therefore, in our model APCs were simulated as an additional layer with  
2097 grid sites  $APC_{ij}$  (**Figure S7a**). The death of infected cells can lead to local antigen presentation,  
2098 i.e.,  $APC_{ij} = 1$ , at the grid site corresponding to the location of the infected cell. As infected cells  
2099 tend to be close to each other and one APC might take up signals from different infected cells in  
2100 the surrounding, only one out of three infected cells would on average result in antigen  
2101 presentation. To represent CXCR3 guided motion, APCs are assumed to produce a local gradient  
2102 of CXCL9/CXCL10 signaling that attracts CD4<sup>+</sup> T cells. Different parameters were tested to define  
2103 the chemotactic strength  $CTX_{APC}$  at which CD4<sup>+</sup> T cells will move along this gradient. With values  
2104 of  $CTX_{APC} = 10$  and  $CTX_{APC} = 100$  resulting in rare or recruitment of almost all CD4<sup>+</sup> T cells to the  
2105 specific APC,  $CTX_{APC}$  was set to 50. Upon contact with an APC, CD4<sup>+</sup> T cells are stimulated with  
2106 the same probabilities  $p_{se}$  and  $p_{sm}$  as before.



2107 **IFN $\gamma$  release:** As CD4<sup>+</sup> T cell motility is observed to be temporarily reduced after contact to an  
2108 antigen (Honda et al., 2014), CD4<sup>+</sup> T cells will stop their movement upon stimulation for on average  
2109 of ~42h, which corresponds to the lifetime of infected cells. The stopping time is therefore  
2110 randomly determined by  $\Gamma(k_1 = 0.25, \theta_1 = 170)$ . During their immobility, cells will secrete IFN $\gamma$  for a  
2111 confined time period, which was set to 2.5 h according to previous observations (Gao et al., 2014).  
2112 Similar as for the viral concentration and infection spread, the effective range of IFN $\gamma$  is regulated  
2113 by the diffusion coefficient for IFN $\gamma$   $D_{IFN}$ , the secretion rate  $\rho_{IFN}$ , as well as the clearance rate,  
2114  $c_{IFN}$  (Eq. (7)). Assessment of these parameters is difficult and previous reported estimates, as e.g.  
2115 for  $\rho_{IFN}$ , vary substantially dependent on the method and system analyzed (Gao et al., 2014; Liao  
2116 et al., 2014). We therefore used different parameter combinations of IFN $\gamma$  production, diffusion  
2117 and clearance to test the effect of varying locally confined IFN $\gamma$  concentrations on the observed  
2118 dynamics. Based on the values for production, degradation and diffusion, we can determine an  
2119 effective IFN $\gamma$  perimeter,  $r_{IFN}(x)$ , given by the radius around the cell membrane up to which an  
2120 IFN $\gamma$  concentration is achieved that would be at least as high as the ED $_x$ , thus leading to a x%-  
2121 chance of inhibiting MCMV replication within infected cells within this area (see Eq. (5) and (6)).  
2122 The perimeter is determined using the steady-state of Eq. (7). Defining an effective diffusion  
2123 coefficient for IFN $\gamma$  of  $D_{IFN}^{eff} = 7.81 \mu\text{m}^2/\text{h}$ , we adjusted the production and clearance rate to  $\rho_{IFN} =$   
2124  $25 \text{ ng cell}^{-1}\text{h}^{-1}$  and  $c_{IFN} = 0.15 \text{ h}^{-1}$ , respectively, to match our experimental observations (**Table A**).  
2125 With this parameterization, an individual CD4<sup>+</sup> T cell would have an effective IFN $\gamma$  perimeter with  
2126 a radius of  $r_{IFN}(50) = 10.77 \mu\text{m}$ ,  $r_{IFN}(25) = 18.97 \mu\text{m}$ , and  $r_{IFN}(10) = 29.53 \mu\text{m}$  for a 50%, 25%  
2127 and 10% chance, respectively, in inhibiting MCMV replication. This would correspond to an area  
2128 of  $364.42 \mu\text{m}^2$ ,  $1130.97 \mu\text{m}^2$  or  $2739.47 \mu\text{m}^2$  around the CD4<sup>+</sup> T cell that would be protected by  
2129 IFN $\gamma$  concentrations that are at least as high as the required ED $_{50}$ , ED $_{25}$ , or ED $_{10}$ , respectively. The  
2130 impact of varying values of  $D_{IFN}^{eff}$ ,  $\rho_{IFN}$  and  $c_{IFN}$ , and thus, varying effective radii for IFN $\gamma$  release  
2131 on the progression of infection and protection was investigated.

2132

### 2133 **Effect of IFN $\gamma$ on viral replication**

2134 IFN $\gamma$  is assumed to suppress MCMV replication in the infected cells by late gene inhibition and  
2135 was previously reported to be dose-dependent and reversible (Kropp et al., 2011; Lucin et al.,  
2136 1994; Presti et al., 1998). In our model, the probability to inhibit viral replication in infected cells  
2137 depends on the dose response relationship,  $g(IFN)$ , given in Eq. (6). The individual parameters,  
2138 i.e., the maximal efficiency replication inhibition per time step,  $y_{max}$ , the ED $_{50}$ , and the Hill-  
2139 coefficient  $n$  that characterize this dose-response relationship were determined using data from  
2140 Lucin et al. (Lucin et al., 1994). In their experiments, Lucin et al. (Lucin et al., 1994) pretreated  
2141 MEFs with different concentrations of IFN $\gamma$  for 48h, and determined the percentage of inhibition of  
2142 viral load measured in pfu at 4 dpi. Even low concentrations of IFN $\gamma$  (<1 ng/ml) resulted in a  
2143 reduction of replication of approximately 40%, and the effect quickly saturated with a maximum  
2144 suppression of <60% at IFN $\gamma$  concentrations of >5 ng/ml. We fitted

2145 
$$f_{inh}(IFN) = 1 - \exp(-g(IFN)48) = 1 - \exp\left(\frac{y_{max}}{1 + \left(\frac{ED_{50}}{IFN + \epsilon}\right)^n} 48\right) \quad (10)$$

2146 to these experimental data, with  $f_{inh}(IFN)$  representing the percentage of inhibition dependent on  
2147 the concentration of  $IFN_{\gamma}$ ,  $IFN$ , after 48h of treatment. Best fits and 95%-prediction intervals are  
2148 shown in **Figure S7g** with best estimates given by  $y_{max} = 1.76 \times 10^{-2} \text{ h}^{-1}$  ( $1.61 \times 10^{-2}$ ,  $2.0 \times 10^{-2}$ ),  
2149  $ED_{50} = 0.41 \text{ ng/ml}$  (0.27, 0.77), and  $n = 0.64$  (0.51, 0.77) with numbers in brackets indicating 95%-  
2150 confidence intervals of parameter estimates (see also **Table A**).

2151

## 2152 **General system settings**

2153 The grid size, as well as simulated time step sizes had to be chosen in a trade-off between the  
2154 required system size, level of detail and simulation duration. As mentioned above, our simulated  
2155 grid size covered an area of  $800 \times 800 \mu\text{m}^2$  with 1 pixel (=lattice site) representing  $2 \mu\text{m}$  in real  
2156 space (**Table A**). This increased scaling allows the simulation of areas that are that large while  
2157 still being able to determine spatiotemporal dynamics on a cellular level with a reasonable  
2158 resolution. In addition, we used periodic boundary conditions and von-Neumann neighborhoods.  
2159 Simulations were run based on a time step size of 1 hour. The duration of a MonteCarlo-Simulation  
2160 time step (,i.e., MCS-duration), which determines the frequency of copy attempts of the CPM per  
2161 simulation time step, was chosen to allow for realistic  $CD4^+$  T cell motility dynamics while retaining  
2162 feasible simulations times. We used a MCS-duration of 0.0015, which resulted in  $> 600$  MCS per  
2163 time step (= 1 h). All simulations were run over 60 days with one run taking around 48 h on the  
2164 high-performance computing cluster bwHPC MLS-WiSO. At the start of each simulation to initiate  
2165 infection, two actively replicating MCMV infected cells were randomly placed within the simulated  
2166 grid. In total, 7 different underlying duct structures were analyzed.

2167

## 2168 **Parameter fitting and estimation procedures**

2169 Parameter fitting for ODE-models describing the dynamics of intracellular viral replication,  $CD4^+$  T  
2170 cell influx, and  $IFN_{\gamma}$  efficacy were performed using Maximum-Likelihood approaches based on the  
2171 R-packages FME (Soetaert. K.; Petzoldt, 2019), deSolve, as well as the *nls*-function from the  
2172 base-package. Parameter identifiability and 95%-confidence intervals of estimates were  
2173 determined by profile likelihood analysis (Raue et al., 2009) using the R-package Profillroning  
2174 (<https://github.com/GabelHub/ProfileIroning>), or the function *nls.profile* from the base-package  
2175 ( $IFN_{\gamma}$ -dose response).

2176 Parameter estimation for individual  $CD4^+$  T cell velocity within the CPM was performed using the  
2177 FitMultiCell pipeline (<https://fitmulticell.gitlab.io>), which is based on combining Morpheus with the  
2178 computational parallelization and high-performance approach pyABC to automatically adjust  
2179 stochastic multi-scale models to experimental data. The pyABC workflow tests multiple parameter  
2180 sets in parallel by subsequently minimizing distance measurements between experimental and  
2181 simulated data. To this end, each simulation is evaluated using the R-Motilitylab package  
2182 (<http://www.motilitylab.net>) to calculate the mean square displacement, the velocity, straightness

2183 and arrest coefficient of each cell. To account for differences in the measurement scales of these  
2184 variables, the coefficient of variance is considered within the fitting procedure by

2185 
$$d_i = \frac{(\mu_i - u)^2}{\sigma_i^2} + \left(\frac{\sigma_i}{\mu_i} - \frac{s}{u}\right)^2$$

2186 defining the calculated distance for the respective quantity  $i$ . Hereby,  $\mu_i$  and  $\sigma_i$ , are the mean and  
2187 standard deviation of the experimental data, and  $u$  and  $s$  the corresponding values for the  
2188 simulated data.

2189

2190

### 2191 **Data and Code availability**

2192 The individual codes and files describing the model structure to be run in Morpheus are made  
2193 publicly available via GitHub (*Github-Link will be added here*).

2194

2195

2196 **Table A:** General systems settings for the cellular Potts models and parameterization of the  
 2197 individual processes of cellular turnover, intracellular viral replication, viral clearance and diffusion,  
 2198 as well as CD4<sup>+</sup> T cell dynamics and IFN $\gamma$ -production as used within the different simulations.  
 2199 Numbers marked with (\*), (#) or (†) indicate parameters that were estimated, adjusted or set,  
 2200 respectively, based on experimental observations and data from the literature. Sources are given  
 2201 within the text. (¶) indicates values that were determined based on data presented within this  
 2202 manuscript. Numbers in round-brackets indicate 95%-confidence intervals of estimates.

| Parameter                              | Description                                       | Unit               | Value                                         |
|----------------------------------------|---------------------------------------------------|--------------------|-----------------------------------------------|
| <b>General systems settings</b>        |                                                   |                    |                                               |
|                                        | Size of the grid                                  | pixel <sup>2</sup> | 400 × 400 (1 px = 2 μm)                       |
|                                        | Time step duration                                | h                  | 1                                             |
|                                        | Duration of a MonteCarlo time step (MCS-duration) |                    | 0.0015 = 5.4 s                                |
|                                        | Epithelial cell area (uninfected)                 | μm <sup>2</sup>    | 120.8 (¶)                                     |
|                                        | Epithelial cell area (infected)                   | μm <sup>2</sup>    | 241.6 (¶)                                     |
|                                        | T cell area                                       | μm <sup>2</sup>    | 50 (¶)                                        |
| <b>Epithelial cell dynamics</b>        |                                                   |                    |                                               |
| $\lambda$                              | max. proliferation rate of epithelial cells       | h <sup>-1</sup>    | 0.204 (#)                                     |
| $N_{\max}$                             | max. number of epithelial cells                   | cells              | 2500 (¶)                                      |
| $p_d$                                  | Probability for cell death of uninfected cells    |                    | $\sim \Gamma(k_T = 40, \theta_T = 55)$ (†)    |
| $p_\delta$                             | Probability for cell death of infected cells      |                    | $\sim \Gamma(k_I = 0.25, \theta_I = 170)$ (†) |
| <b>Intracellular viral replication</b> |                                                   |                    |                                               |
| $\alpha_R$                             | viral net-replication rate                        | h <sup>-1</sup>    | 0.41 (*)<br>(0.38, 0.49)                      |

|                                          |                                                            |                                |                            |
|------------------------------------------|------------------------------------------------------------|--------------------------------|----------------------------|
| $R_{\max}$                               | max. carrying capacity of intracellular virus per cell     | gen. copy equiv.               | 1060 (*)<br>(1020,1260)    |
| $\rho_R$                                 | viral export rate                                          | pfu/ gen. copy equiv. $h^{-1}$ | 0.03 (*)<br>(0.02,0.11)    |
| $c_R$                                    | viral clearance rate (intracell.)                          | $h^{-1}$                       | 0.45 (*)<br>(0.20,1.65)    |
| <b>Extracellular viral concentration</b> |                                                            |                                |                            |
| $c$                                      | viral clearance rate (extracell.)                          | $h^{-1}$                       | 0.45 (*)<br>(0.20,1.65)    |
| $D_V^{eff}$                              | effective viral diffusion coefficient for the simulations  | $\mu m^2 h^{-1}$               | 64 (#)                     |
| $\beta$                                  | Cell-free transmission rate                                | pfu $^{-1}h^{-1}$              | $1.5 \times 10^{-3}$ (#)   |
| <b>CD4<sup>+</sup> T cell dynamics</b>   |                                                            |                                |                            |
| $\sigma_{in, end}$                       | influx rate of endogen. CD4 <sup>+</sup> T cells           | $\times 10^{-2} h^{-1}$        | 0.17 (*,†)<br>(0.07, 0.31) |
| $\sigma_{out, end}$                      | loss rate of endogen. CD4 <sup>+</sup> T cells             | $\times 10^{-2} h^{-1}$        | 0.17 (*,†)<br>(0.07, 0.31) |
| $\sigma_{in, M25}$                       | influx rate of M25 CD4 <sup>+</sup> T cells                | $\times 10^{-2} h^{-1}$        | 0.9 (*,†)<br>(0.40, 0.31)  |
| $\sigma_{out, M25}$                      | loss rate of M25 CD4 <sup>+</sup> T cells                  | $\times 10^{-2} h^{-1}$        | 0.9 (*,†)<br>(0.40, 1.40)  |
| $E_{0, end}$                             | Initial concentration of endogen. CD4 <sup>+</sup> T cells | cells                          | 960 (*,†)<br>(510, 2580)   |
| $E_{0, M25}$                             | Initial concentration of M25 CD4 <sup>+</sup> T cells      | cells                          | 20 (*,†)<br>(10, 460)      |
| $s_T$                                    | Persistence strength                                       |                                | 180 (*)                    |

|                                                    |                                                                               |                                       |                          |
|----------------------------------------------------|-------------------------------------------------------------------------------|---------------------------------------|--------------------------|
| $\tau_T$                                           | Decay time                                                                    | min                                   | 8.9 (*)                  |
| $CTX_{APC}$                                        | Chemotactic strength to follow CXCL9/CXCL10 gradients                         |                                       | 50 (#)                   |
| $\lambda_{se}$                                     | stimulation rate of end. CD4 <sup>+</sup> T cells                             | h <sup>-1</sup>                       | 0.05 (#)                 |
| $\lambda_{sm}$                                     | stimulation rate of M25 CD4 <sup>+</sup> T cells                              | h <sup>-1</sup>                       | 0.15 (#)                 |
| <b>IFN<math>\gamma</math> release and efficacy</b> |                                                                               |                                       |                          |
| $y_{max}$                                          | max. rate of replication inhibition by                                        | $\times 10^{-2} \text{ h}^{-1}$       | 1.76 (*)<br>(1.61, 2.0)  |
| $ED_{50}$                                          | effective dose                                                                | ng/ml                                 | 0.41 (*)<br>(0.27, 0.77) |
| $n$                                                | Hill-coefficient for dose-response relationship                               |                                       | 0.64 (*)<br>(0.51, 0.77) |
| $\rho_{IFN}$                                       | Production rate of IFN $\gamma$                                               | ng h <sup>-1</sup> cell <sup>-1</sup> | 25 (#)                   |
| $c_{IFN}$                                          | Degradation rate of IFN $\gamma$                                              | h <sup>-1</sup>                       | 0.15 (#)                 |
| $D_{IFN}^{eff}$                                    | effective diffusion coefficient of IFN $\gamma$ for standard parameterization | $\mu\text{m}^2 \text{ h}^{-1}$        | 7.81 (#)                 |
| <b>CXCL9/CXCL10 dynamics</b>                       |                                                                               |                                       |                          |
| $\rho_{CX9/10}$                                    | Release rate of CXCL9/10                                                      | h <sup>-1</sup>                       | 0.05 (#)                 |
| $c_{CX9/10}$                                       | Degradation rate of CXCL9/10                                                  | h <sup>-1</sup>                       | 0.04 (#)                 |
| $D_{CX9/10}$                                       | Diffusion coefficient of CXCL9/10                                             | $\mu\text{m}^2 \text{ h}^{-1}$        | 8.0 (#)                  |

|             |                                                                              |  |        |
|-------------|------------------------------------------------------------------------------|--|--------|
| $CTX_{APC}$ | Chemotactic strength of CD4 <sup>+</sup> T cells following CXCL9/10 gradient |  | 50 (#) |
|-------------|------------------------------------------------------------------------------|--|--------|

2203  
 2204 **Table B:** CD4<sup>+</sup> T cell dynamics based as observed on the cross sections of SMG. The observed  
 2205 cell numbers for endogenous and M25 CD4<sup>+</sup>T cells at 8 dpi with the determined conversion factor  
 2206 for the simulated area of 800×800 μm<sup>2</sup>, as well as the transformed cell counts at 0, 8, 14 and 30  
 2207 dpi are shown. The latter were used in the analysis for determining the net-influx and efflux rates  
 2208 based on Eq. (9) (see also **Figure S7e** and **Table A**). Observations were based on 4 cross  
 2209 sections with the mean ± SD shown.

| <b>Transformation factor of cell counts based on cross section image analyses (n=4) at 8 dpi</b> |                                         |                                    |
|--------------------------------------------------------------------------------------------------|-----------------------------------------|------------------------------------|
|                                                                                                  | <b>Endogen. CD4<sup>+</sup> T cells</b> | <b>M25 CD4<sup>+</sup> T cells</b> |
| Mean cell count (1×1 cm <sup>2</sup> )                                                           | 509.88                                  | 10.54                              |
| Mean # cells (800×800 μm <sup>2</sup> )                                                          | 326.32                                  | 6.74                               |
| Mean # cells (SMG, extrapolation)                                                                | 76501.06                                | 30731.16                           |
| Transformation factor                                                                            | 234.43                                  | 4557.70                            |
| <b>Transformed cell counts for 800×800 μm<sup>2</sup> sections</b>                               |                                         |                                    |
| <b>Time (dpi)</b>                                                                                | <b>Endogen. CD4<sup>+</sup> T cells</b> | <b>M25 CD4<sup>+</sup> T cells</b> |
| 0                                                                                                | 63 (± 29.6)                             | 0 (± 0)                            |
| 8                                                                                                | 223 (± 101.1)                           | 6.4 (± 2.9)                        |
| 14                                                                                               | 386 (± 91.1)                            | 3.48 (± 2.2)                       |
| 30                                                                                               | 357 (± 92.5)                            | 0.3 (± 0.1)                        |

2210  
 2211  
 2212  
 2213  
 2214  
 2215  
 2216  
 2217  
 2218  
 2219

## REFERENCES

- 2220  
2221  
2222 Aure, M.H., Konieczny, S.F., and Ovitt, C.E. (2015). Salivary gland homeostasis is maintained  
2223 through acinar cell self-duplication. *Dev Cell* **33**, 231-237.
- 2224 Berg, S., Kutra, D., Kroeger, T., Straehle, C.N., Kausler, B.X., Haubold, C., Schiegg, M., Ales, J.,  
2225 Beier, T., Rudy, M., *et al.* (2019). ilastik: interactive machine learning for (bio)image analysis. *Nat*  
2226 *Methods* **16**, 1226-1232.
- 2227 Dick, J.E., Hilterbrand, A.T., Boika, A., Upton, J.W., and Bard, A.J. (2015). Electrochemical  
2228 detection of a single cytomegalovirus at an ultramicroelectrode and its antibody anchoring. *Proc*  
2229 *Natl Acad Sci U S A* **112**, 5303-5308.
- 2230 Fox, J.B., S.; Davisson, M.; Newcomer, C.; Quimby, F.; Smith, A. (2006). *The Mouse in*  
2231 *Biomedical Research Vol.2 - Diseases* (San Diego, United States: Elsevier Science Publishing  
2232 Co Inc.).
- 2233 Gao, Y., Zhou, Q., Matharu, Z., Liu, Y., Kwa, T., and Revzin, A. (2014). A mathematical method  
2234 for extracting cell secretion rate from affinity biosensors continuously monitoring cell activity.  
2235 *Biomicrofluidics* **8**, 021501.
- 2236 Glazier, J.A., and Graner, F. (1993). Simulation of the differential adhesion driven rearrangement  
2237 of biological cells. *Phys Rev E Stat Phys Plasmas Fluids Relat Interdiscip Topics* **47**, 2128-2154.
- 2238 Graner, F., and Glazier, J.A. (1992). Simulation of biological cell sorting using a two-dimensional  
2239 extended Potts model. *Phys Rev Lett* **69**, 2013-2016.
- 2240 Honda, T., Egen, J.G., Lämmermann, T., Kastenmüller, W., Torabi-Parizi, P., and Germain, R.N.  
2241 (2014). Tuning of antigen sensitivity by T cell receptor-dependent negative feedback controls T  
2242 cell effector function in inflamed tissues. *Immunity* **40**, 235-247.
- 2243 Kropp, K.A., Robertson, K.A., Sing, G., Rodriguez-Martin, S., Blanc, M., Lacaze, P., Hassim,  
2244 M.F., Khondoker, M.R., Busche, A., Dickinson, P., *et al.* (2011). Reversible inhibition of murine  
2245 cytomegalovirus replication by gamma interferon (IFN- $\gamma$ ) in primary macrophages involves a  
2246 primed type I IFN-signaling subnetwork for full establishment of an immediate-early antiviral  
2247 state. *J Virol* **85**, 10286-10299.
- 2248 Kwak, M., Alston, N., and Ghazizadeh, S. (2016). Identification of Stem Cells in the Secretory  
2249 Complex of Salivary Glands. *J Dent Res* **95**, 776-783.
- 2250 Liao, K.L., Bai, X.F., and Friedman, A. (2014). Mathematical modeling of interleukin-27 induction  
2251 of anti-tumor T cells response. *PLoS One* **9**, e91844.
- 2252 Lucin, P., Jonjić, S., Messerle, M., Polić, B., Hengel, H., and Koszinowski, U.H. (1994). Late  
2253 phase inhibition of murine cytomegalovirus replication by synergistic action of interferon-gamma  
2254 and tumour necrosis factor. *J Gen Virol* **75** (*Pt 1*), 101-110.
- 2255 Marcinowski, L., Lidschreiber, M., Windhager, L., Rieder, M., Bosse, J.B., Rädle, B., Bonfert, T.,  
2256 Györy, I., de Graaf, M., Prazeres da Costa, O., *et al.* (2012). Real-time transcriptional profiling of  
2257 cellular and viral gene expression during lytic cytomegalovirus infection. *PLoS Pathog* **8**,  
2258 e1002908.



- 2259 Misra, V., Muller, M.T., and Hudson, J.B. (1977). The enumeration of viral genomes in murine  
2260 cytomegalovirus-infected cells. *Virology* 83, 458-461.
- 2261 Munger, J., Bajad, S.U., Collier, H.A., Shenk, T., and Rabinowitz, J.D. (2006). Dynamics of the  
2262 cellular metabolome during human cytomegalovirus infection. *PLoS Pathog* 2, e132.
- 2263 Presti, R.M., Pollock, J.L., Dal Canto, A.J., O'Guin, A.K., and Virgin, H.W.t. (1998). Interferon  
2264 gamma regulates acute and latent murine cytomegalovirus infection and chronic disease of the  
2265 great vessels. *J Exp Med* 188, 577-588.
- 2266 Rand, U., Rinas, M., Schwerk, J., Nöhren, G., Linnes, M., Kröger, A., Flossdorf, M., Kály-Kullai,  
2267 K., Hauser, H., Höfer, T., and Köster, M. (2012). Multi-layered stochasticity and paracrine signal  
2268 propagation shape the type-I interferon response. *Mol Syst Biol* 8, 584.
- 2269 Raue, A., Kreutz, C., Maiwald, T., Bachmann, J., Schilling, M., Klingmüller, U., and Timmer, J.  
2270 (2009). Structural and practical identifiability analysis of partially observed dynamical models by  
2271 exploiting the profile likelihood. *Bioinformatics* 25, 1923-1929.
- 2272 Schwartz-Arad, D., Arber, L., Arber, N., Zajicek, G., and Michaeli, Y. (1988). The rat parotid  
2273 gland--a renewing cell population. *J Anat* 161, 143-151.
- 2274 Soetaert, K.; Petzoldt, T. (2019). FME. <http://cran-r-project.org/web/packages/FME/FME.pdf>.
- 2275 Starruss, J., De Back, W., Bruschi, L., and Deutsch, A. (2014). Morpheus: a user-friendly  
2276 modeling environment for multiscale and multicellular systems biology. *Journal of Tissue  
2277 Engineering and Regenerative Medicine* 8, 52-52.
- 2278 Stolp, B., Thelen, F., Ficht, X., Altenburger, L.M., Ruef, N., Inavalli, V., Germann, P., Page, N.,  
2279 Moalli, F., Raimondi, A., *et al.* (2020). Salivary gland macrophages and tissue-resident CD8(+) T  
2280 cells cooperate for homeostatic organ surveillance. *Sci Immunol* 5.
- 2281 Verma, S., Weiskopf, D., Gupta, A., McDonald, B., Peters, B., Sette, A., and Benedict, C.A.  
2282 (2016). Cytomegalovirus-Specific CD4 T Cells Are Cytolytic and Mediate Vaccine Protection. *J  
2283 Virol* 90, 650-658.
- 2284 Walton, S.M., Mandaric, S., Torti, N., Zimmermann, A., Hengel, H., and Oxenius, A. (2011).  
2285 Absence of cross-presenting cells in the salivary gland and viral immune evasion confine  
2286 cytomegalovirus immune control to effector CD4 T cells. *PLoS Pathog* 7, e1002214.
- 2287 Wirtz, N., Schader, S.I., Holtappels, R., Simon, C.O., Lemmermann, N.A., Reddehase, M.J., and  
2288 Podlech, J. (2008). Polyclonal cytomegalovirus-specific antibodies not only prevent virus  
2289 dissemination from the portal of entry but also inhibit focal virus spread within target tissues.  
2290 *Med Microbiol Immunol* 197, 151-158.
- 2291
- 2292
